# Supplementary material for: On the diversity and richness of understory bryophytes at Nectandra Cloud Forest Reserve, Costa Rica
Source: Biodivers Data J. 2017 Mar 24;(5):e11778. doi: 10.3897/BDJ.5.e11778 (PMC5515068; doi:10.3897/BDJ.5.e11778)
Supplement: Supplementary material 1 — List of 1083 bryophyte specimens collected at Nectandra classified to level of genera [file bdj-05-e11778-s001.xlsx]

## Sheet: Supp genera list
Group	Ucjep.No	Collecting.No	Genus	epithet	.	Habitat			Coll Date	Collector
Hornwort	UC2053250	110519	Anthoceros		Anthocerotaceae	On moist, diffusely lit soil in cloud forest on moderate slopes of the watershed of the Quebrada Verde in the Cordillera de TilarÃ¡n near headquarters of Nectandra Gardens along Highway 142 about 15 km north of San Ramon in San Ramon Canton, Angeles District.			2007-07-05	D. H. Norris
Hornwort	UC2053389	111204	Anthoceros	laevis	Anthocerotaceae	On moist, diffusely lit base of tree in area of cloud forest			2010-03-11	D. H. Norris
Hornwort	UC2053265	110890	Megaceros		Dendrocerotaceae	On stones along trail in Nectandra Reserve.			2009-03-26	D. H. Norris
Hornwort	UC2053269	110911	Megaceros		Dendrocerotaceae	On rocks in estero at bridge in Nectandra Reserve.			2009-03-26	D. H. Norris
Hornwort	UC2053835	110925A	Megaceros		Dendrocerotaceae	On log along creek at bridge in Nectandra Reserve			2009-03-26	D. H. Norris
Hornwort	UC2053628	29	Megaceros		Dendrocerotaceae	On stone in area od cloud forest			2010-03-11	P. Nonkulolu
Hornwort	UC2053630	30	Megaceros		Dendrocerotaceae	On stone			2010-03-11	P. Nonkulolu
Hornwort	UC2053933	31	Megaceros		Dendrocerotaceae	On stone in area of cloud forest.			2010-03-11	P. Nonkulolu
Hornwort	UC2053636	42	Megaceros		Dendrocerotaceae	On tree near laboratory in the Nectandra gardens in cloud forest			2010-03-11	D. Lucas
Hornwort	UC2053821	44	Megaceros		Dendrocerotaceae	On rock in the Nectandra Gardens in cloud forest.			2010-03-11	D. Lucas
Hornwort	UC2053215	109969	Megaceros	vincentianus	Dendrocerotaceae	On shaded, clayey soil along Trail "A" in cloud forest along road on moderate slopes of the watershed of the Quebrada Verde in the Cordillera de TilarÃ¡n along Highway 142 about 15 km north of San Ramon in San Ramon Canton, Angeles District.			2007-07-05	D. H. Norris
Hornwort	UC2053627	110076	Megaceros	vincentianus	Dendrocerotaceae	On very moist, shaded log along Trail "E" in cloud forest on moderate slopes of the watershed of the Quebrada Verde in the Cordillera de TilarÃ¡n along Highway 142 about 15 km north of San Ramon in San Ramon Canton, Angeles District.			2007-07-05	D. H. Norris
Hornwort		110301	Megaceros	vincentianus	Dendrocerotaceae	On moist, rather shaded log along Trail "E" in cloud forest on moderate slopes of the watershed of the Quebrada Verde in the Cordillera de TilarÃ¡n along Highway 142 about 15 km north of San Ramon in San Ramon Canton, Angeles District.			2007-07-05	D. H. Norris
Hornwort	UC2053673	110593	Megaceros	vincentianus	Dendrocerotaceae	On moist, shaded rock of stairs in trail in cloud forest along Trail "E" on moderate slopes of the watershed of the Quebrada Verde in the Cordillera de TilarÃ¡n at Nectandra Gardens along Highway 142 about 15 km north of San Ramon in San Ramon Canton, Angeles District.			2007-07-05	D. H. Norris
Hornwort	UC2054043	110301A	Megaceros	vincentianus	Dendrocerotaceae	On moist, rather shaded log along Trail "E" in cloud forest			2007-07-05	D. H. Norris
Hornwort	UC2053362	110435	Megaceros	vincentianus	Dendrocerotaceae	On moist, shaded tree along Trail "C" in cloud forest on moderate slopes of the watershed of the Quebrada Verde in the Cordillera de TilarÃ¡n along Highway 142 about 15 km north of San Ramon in San Ramon Canton, Angeles District.			2007-07-05	D. H. Norris
Hornwort	UC2053614	110128	Phaeoceros		Notothyladaceae	On moist, shaded log along Trail "E" in cloud forest on moderate slopes of the watershed of the Quebrada Verde in the Cordillera de TilarÃ¡n along Highway 142 about 15 km north of San Ramon in San Ramon Canton, Angeles District.			2007-07-05	D. H. Norris
Hornwort	UC2053868	110199C	Phaeoceros		Notothyladaceae	On moist, diffusely lit soil at edge of clearing at crest of Trail "A" in cloud forest border adjacent to pastured lands			2007-07-05	D. H. Norris
Liverwort	UC2053818	21	Tylimanthus	laxus	Acrobolbaceae	On rock in the Nectandra Gardens in cloud forest.			2010-03-11	D. H. Norris
Liverwort	UC2053653	110394	Aneura		Aneuraceae	On moist, shaded boulder on steep bank of intermittent stream along Trail "C" in cloud forest on moderate slopes of the watershed of the Quebrada Verde in the Cordillera de TilarÃ¡n along Highway 142 about 15 km north of San Ramon in San Ramon Canton, Angeles District.			2007-07-05	D.H.Norris, 2008.
Liverwort		110292B	Riccardia		Aneuraceae	On moist, diffusely lit fencepost in small creek at crest of Trail "A" in cloud forest border adjacent to pastured lands on moderate slopes of the watershed of the Quebrada Verde in the Cordillera de TilarÃ¡n along Highway 142 about 15 km north of San Ramon in San Ramon Canton, Angeles District.			2007-07-05	D. H. Norris
Liverwort		110595	Riccardia		Aneuraceae	On moist, shaded log in cloud forest along Trail "E" on moderate slopes of the watershed of the Quebrada Verde in the Cordillera de TilarÃ¡n at Nectandra Gardens along Highway 142 about 15 km north of San Ramon in San Ramon Canton, Angeles District.			2007-07-05	D.H.Norris, 2008.
Liverwort	UC2053925	48	Riccardia	fucoides	Aneuraceae	On rock along trail in the Nectandra Gardens in cloud forest.			2010-03-11	D. H. Norris
Liverwort	UC2053651	110074	Riccardia		Aneuraceae	On very moist, shaded rounded boulder in stream along Trail "E" in cloud forest on moderate slopes of the watershed of the Quebrada Verde in the Cordillera de TilarÃ¡n along Highway 142 about 15 km north of San Ramon in San Ramon Canton, Angeles District.			2007-07-05	D. H. Norris
Liverwort	UC2053670	110075	Riccardia		Aneuraceae	On very moist, shaded rounded boulder in stream along Trail "E" in cloud forest on moderate slopes of the watershed of the Quebrada Verde in the Cordillera de TilarÃ¡n along Highway 142 about 15 km north of San Ramon in San Ramon Canton, Angeles District.			2007-07-05	D. H. Norris
Liverwort	UC2053654	110302	Riccardia		Aneuraceae	On moist, rather shaded log along Trail "E" in cloud forest on moderate slopes of the watershed of the Quebrada Verde in the Cordillera de TilarÃ¡n along Highway 142 about 15 km north of San Ramon in San Ramon Canton, Angeles District.			2007-07-05	D.H.Norris, 2008.
Liverwort	UC2053225	110334	Riccardia		Aneuraceae	On moist, shaded log along Trail "E" in cloud forest on moderate slopes of the watershed of the Quebrada Verde in the Cordillera de TilarÃ¡n along Highway 142 about 15 km north of San Ramon in San Ramon Canton, Angeles District.			2007-07-05	D. H. Norris
Liverwort	UC2053648	110342	Riccardia		Aneuraceae	On moist, shaded soil of vertical trail bank along Trail "E" in cloud forest on moderate slopes of the watershed of the Quebrada Verde in the Cordillera de TilarÃ¡n along Highway 142 about 15 km north of San Ramon in San Ramon Canton, Angeles District.			2007-07-05	D. H. Norris
Liverwort	UC2053226	110520	Riccardia		Aneuraceae	On moist, diffusely lit soil in cloud forest on moderate slopes of the watershed of the Quebrada Verde in the Cordillera de TilarÃ¡n near headquarters of Nectandra Gardens along Highway 142 about 15 km north of San Ramon in San Ramon Canton, Angeles District.			2007-07-05	D. H. Norris
Liverwort	UC2053229	110913	Riccardia		Aneuraceae	On log in Nectandra Reserve.			2009-03-26	D. H. Norris
Liverwort	UC2053649	110936	Riccardia		Aneuraceae	On shaded soil in open area beyond rope bridge in Nectandra Reserve.			2009-03-26	D. H. Norris
Liverwort	UC2053227	111220	Riccardia		Aneuraceae	On moist, diffusely lit base of tree in area of cloud forest			2010-03-11	D. H. Norris
Liverwort	UC2053243	111233	Riccardia		Aneuraceae	On log in area of cloud forest			2010-03-11	D. H. Norris
Liverwort	UC2053650	111242	Riccardia		Aneuraceae	On stone along Trail "A" of Nectandra Gardens in area of cloud forest.			2010-03-11	D. H. Norris
Liverwort	UC2053759	17188	Riccardia		Aneuraceae	On boulder in stream at edge of multi-layered tropical cloud forest abutting on Dracaena plantation.			2010-03-11	Allen Risk
Liverwort	UC2053765	17193	Riccardia		Aneuraceae	On boulder in stream at edge of multi-layered tropical cloud forest abutting on Dracaena plantation.			2010-03-11	Allen Risk
Liverwort	UC2054007	21	Riccardia		Aneuraceae	On tree trunk in area of cloud forest.			2010-03-11	P. Nonkulolu
Liverwort	UC2053224	110294	Riccardia	multifida	Aneuraceae	On moist, diffusely lit fencepost in small creek at crest of Trail "A" in cloud forest border adjacent to pastured lands on moderate slopes of the watershed of the Quebrada Verde in the Cordillera de TilarÃ¡n along Highway 142 about 15 km north of San Ramon in San Ramon Canton, Angeles District.			2007-07-05	D. H. Norris
Liverwort	UC2053228	110307	Riccardia	subg. Dendroceropsis	Aneuraceae	On moist, shaded rock along Trail "E" in cloud forest on moderate slopes of the watershed of the Quebrada Verde in the Cordillera de TilarÃ¡n along Highway 142 about 15 km north of San Ramon in San Ramon Canton, Angeles District.			2007-07-05	D. H. Norris
Liverwort	UC2053556	110082	Plagiochasma		Aytoniaceae	On moist, shaded rounded boulder on bank of stream along Trail "E" in cloud forest on moderate slopes of the watershed of the Quebrada Verde in the Cordillera de TilarÃ¡n along Highway 142 about 15 km north of San Ramon in San Ramon Canton, Angeles District.			2007-07-05	D. H. Norris
Liverwort	UC2053357	110367	Plagiochasma	rupestre	Aytoniaceae	On moist, diffusely lit rock wall along Trail "C" in cloud forest on moderate slopes of the watershed of the Quebrada Verde in the Cordillera de TilarÃ¡n along Highway 142 about 15 km north of San Ramon in San Ramon Canton, Angeles District.			2007-07-05	D. H. Norris
Liverwort	UC2053238	110370	Reboulia		Aytoniaceae	On moist, diffusely lit rock wall along Trail "C" in cloud forest on moderate slopes of the watershed of the Quebrada Verde in the Cordillera de TilarÃ¡n along Highway 142 about 15 km north of San Ramon in San Ramon Canton, Angeles District.			2007-07-05	D. H. Norris
Liverwort	UC2053655	110532	Reboulia		Aytoniaceae	On moist, diffusely lit cement of steps in cloud forest along Trail "E" on moderate slopes of the watershed of the Quebrada Verde in the Cordillera de TilarÃ¡n at Nectandra Gardens along Highway 142 about 15 km north of San Ramon in San Ramon Canton, Angeles District.			2007-07-05	D. H. Norris
Liverwort	UC2053790	5715	Mnioloma	cyclostipum	Calypogeiaceae	On soil at base of tree along trail in Nectandra Gardens.			2010-03-13	D. H. Norris
Liverwort	UC2053741	17167	Mnioloma		Calypogeiaceae	On trunk of tree in cloud forest.			2010-03-11	D. H. Norris
Liverwort	UC2053748	17175	Mnioloma		Calypogeiaceae	On trunk of tree at edge of cloud forest abutting on Dracaena plantation.			2010-03-11	D. H. Norris
Liverwort	UC2053746	17172	Alobiellopsis	dominicensis	Cephaloziaceae	On trunk of tree at edge of cloud forest abutting on Dracaena plantation.			2010-03-11	D. H. Norris
Liverwort		110092	Cephalozia		Cephaloziaceae	On very moist, shaded buttress of large tree fern along Trail "E" in cloud forest on moderate slopes of the watershed of the Quebrada Verde in the Cordillera de TilarÃ¡n along Highway 142 about 15 km north of San Ramon in San Ramon Canton, Angeles District.			2007-07-05	D. H. Norris
Liverwort		110551A	Cephalozia		Cephaloziaceae	On moist, shaded log along trail in cloud forest along Trail "E" on moderate slopes of the watershed of the Quebrada Verde in the Cordillera de TilarÃ¡n at Nectandra Gardens along Highway 142 about 15 km north of San Ramon in San Ramon Canton, Angeles District.			2007-07-05	D. H. Norris
Liverwort	UC2053279	111249	Cephalozia		Cephaloziaceae	On log along Trail "A" of Nectandra Gardens in area of cloud forest			2010-03-11	D. H. Norris
Liverwort	UC2053278	110269	Odontoschisma		Cephaloziaceae	On moist, sunny fencepost at crest of Trail "A" in cloud forest border adjacent to pastured lands on moderate slopes of the watershed of the Quebrada Verde in the Cordillera de TilarÃ¡n along Highway 142 about 15 km north of San Ramon in San Ramon Canton, Angeles District.			2007-07-05	D.H.Norris, 2008.
Liverwort	UC2053276	110151	Cephaloziella		Cephaloziellaceae	On moist, shaded bark of tree along Trail "E" in cloud forest on moderate slopes of the watershed of the Quebrada Verde in the Cordillera de TilarÃ¡n along Highway 142 about 15 km north of San Ramon in San Ramon Canton, Angeles District.			2007-07-05	D. H. Norris
Liverwort	UC2053275	110179	Cephaloziella		Cephaloziellaceae	On moist, sunny limbs of shrub at crest of Trail "A" in cloud forest border adjacent to pastured lands on moderate slopes of the watershed of the Quebrada Verde in the Cordillera de TilarÃ¡n along Highway 142 about 15 km north of San Ramon in San Ramon Canton, Angeles District.			2007-07-05	D. H. Norris
Liverwort	UC2053785	110080	Cephaloziopsis	intertexta	Cephaloziellaceae	On very moist to submerged, diffusely lit rounded boulder in stream along Trail "E" in cloud forest on moderate slopes of the watershed of the Quebrada Verde in the Cordillera de TilarÃ¡n along Highway 142 about 15 km north of San Ramon in San Ramon Canton, Angeles District.			2007-07-05	D. H. Norris
Liverwort		110023A	Frullania		Frullaniaceae	On stems of shrub along Trail "A" in cloud forest on moderate slopes of the watershed of the Quebrada Verde in the Cordillera de TilarÃ¡n along Highway 142 about 15 km north of San Ramon in San Ramon Canton, Angeles District.			2007-07-05	D. H. Norris
Liverwort	UC2053660	110041	Frullania		Frullaniaceae	On moist, rather sunny small tree at crest of Trail "A" in cloud forest border adjacent to pastured lands on moderate slopes of the watershed of the Quebrada Verde in the Cordillera de TilarÃ¡n along Highway 142 about 15 km north of San Ramon in San Ramon Canton, Angeles District.			2007-07-05	D. H. Norris
Liverwort		110589	Frullania		Frullaniaceae	On moist, diffusely lit twigs of shrub in cloud forest along Trail "E" on moderate slopes of the watershed of the Quebrada Verde in the Cordillera de TilarÃ¡n at Nectandra Gardens along Highway 142 about 15 km north of San Ramon in San Ramon Canton, Angeles District.			2007-07-05	D. H. Norris
Liverwort	UC2053911	45	Frullania	brasiliensis	Frullaniaceae	On tree in partial shade in the Nectandra Gardens in cloud forest.			2010-03-11	D. Lucas
Liverwort		110221	Frullania	gymnotis	Frullaniaceae	On moist, sunny fencepost at crest of Trail "A" in cloud forest border adjacent to pastured lands on moderate slopes of the watershed of the Quebrada Verde			2007-07-05	D. H. Norris
Liverwort	UC2053659	110117	Frullania		Frullaniaceae	On moist, shaded limb fallen from canopy along Trail "E" in cloud forest on moderate slopes of the watershed of the Quebrada Verde in the Cordillera de TilarÃ¡n along Highway 142 about 15 km north of San Ramon in San Ramon Canton, Angeles District.			2007-07-05	D. H. Norris
Liverwort	UC2053328	110142	Frullania		Frullaniaceae	On moist, shaded branches of shrub along Trail "E" in cloud forest on moderate slopes of the watershed of the Quebrada Verde			2007-07-05	D. H. Norris
Liverwort	UC2053326	110164	Frullania		Frullaniaceae	On moist, shaded bark of small tree along Trail "E" in cloud forest on moderate slopes of the watershed of the Quebrada Verde in the Cordillera de TilarÃ¡n along Highway 142 about 15 km north of San Ramon in San Ramon Canton, Angeles District.			2007-07-05	D. H. Norris
Liverwort	UC2053327	110262	Frullania		Frullaniaceae	On moist, rather shaded base of shrub at crest of Trail "A" in cloud forest border adjacent to pastured lands on moderate slopes of the watershed of the Quebrada Verde in the Cordillera de TilarÃ¡n along Highway 142 about 15 km north of San Ramon in San Ramon Canton, Angeles District.			2007-07-05	D. H. Norris
Liverwort	UC2054051	110398A	Frullania		Frullaniaceae	On moist, shaded leaves of shrub along Trail "C" in cloud forest			2007-07-05	D. H. Norris
Liverwort	UC2053658	110579	Frullania		Frullaniaceae	On moist, rather shaded bark of small tree in cloud forest along Trail "E" on moderate slopes of the watershed of the Quebrada Verde in the Cordillera de TilarÃ¡n at Nectandra Gardens along Highway 142 about 15 km north of San Ramon in San Ramon Canton, Angeles District.			2007-07-05	D. H. Norris
Liverwort	UC2053662	111085	Frullania		Frullaniaceae	On bark of tree in the Nectandra Gardens in area of cloud forest.			2007-07-05	D. H. Norris
Liverwort	UC2053811	61	Frullania		Frullaniaceae	On bark of tree in creek near headquarters of the Nectandra Gardens.			2010-03-11	D. H. Norris
Liverwort	UC2053912	40	Frullania		Frullaniaceae	On tree in partial shade in the Nectandra Gardens in cloud forest.			2010-03-11	D. H. Norris
Liverwort	UC2053274	110158	undetermined		Geocalycaceae	On moist, shaded horizontal limb of shrub along Trail "E" in cloud forest on moderate slopes of the watershed of the Quebrada Verde in the Cordillera de TilarÃ¡n along Highway 142 about 15 km north of San Ramon in San Ramon Canton, Angeles District.			2007-07-05	D. H. Norris
Liverwort	UC2053665	110069	Heteroscyphus		Geocalycaceae	On very moist, shaded buttress of tree fern along Trail "E" in cloud forest on moderate slopes of the watershed of the Quebrada Verde in the Cordillera de TilarÃ¡n along Highway 142 about 15 km north of San Ramon in San Ramon Canton, Angeles District.			2007-07-05	D. H. Norris
Liverwort	UC2054050	110392A	Heteroscyphus		Geocalycaceae	On moist, shaded boulder along intermittent stream along Trail "C" in cloud forest			2007-07-05	D. H. Norris
Liverwort	UC2053898	24	Heteroscyphus		Geocalycaceae	In the Nectandra Gardens in cloud forest.			2010-03-11	D. H. Norris
Liverwort	UC2053531	109973	Herbertus	pensilis	Herbertaceae	On boulders along Trail "A"in cloud forest on moderate slopes of the watershed of the Quebrada Verde in the Cordillera de TilarÃ¡n along Highway 142 about 15 km north of San Ramon in San Ramon Canton, Angeles District.			2007-07-05	D. H. Norris
Liverwort	UC2053219	109982	Herbertus	pensilis	Herbertaceae	On branches of tree fallen from high in canopy along Trail "A" in cloud forest on moderate slopes of the watershed of the Quebrada Verde in the Cordillera de TilarÃ¡n along Highway 142 about 15 km north of San Ramon in San Ramon Canton, Angeles District.			2007-07-05	D. H. Norris
Liverwort		109996	Herbertus	pensilis	Herbertaceae	On branches of tree fallen from high in canopy along Trail "A" in cloud forest on moderate slopes of the watershed of the Quebrada Verde in the Cordillera de TilarÃ¡n along Highway 142 about 15 km north of San Ramon in San Ramon Canton, Angeles District.			2007-07-05	D. H. Norris
Liverwort		110054	Herbertus	pensilis	Herbertaceae	Pendent from tree in cloud forest near headquarters of Nectandra Garden on moderate slopes of the watershed of the Quebrada Verde in the Cordillera de TilarÃ¡n along Highway 142 about 15 km north of San Ramon in San Ramon Canton, Angeles District.			2007-07-05	D. H. Norris
Liverwort		110056	Herbertus	pensilis	Herbertaceae	On branches of shrub in cloud forest near headquarters of Nectandra Garden on moderate slopes of the watershed of the Quebrada Verde in the Cordillera de TilarÃ¡n along Highway 142 about 15 km north of San Ramon in San Ramon Canton, Angeles District.			2007-07-05	D. H. Norris
Liverwort		110274	Herbertus	pensilis	Herbertaceae	On moist, diffusely lit fencepost at crest of Trail "A" in cloud forest border adjacent to pastured lands on moderate slopes of the watershed of the Quebrada Verde in the Cordillera de TilarÃ¡n along Highway 142 about 15 km north of San Ramon in San Ramon Canton, Angeles District.			2007-07-05	D. H. Norris
Liverwort		110376	Herbertus	pensilis	Herbertaceae	On moist, shaded boulder along Trail "C" in cloud forest on moderate slopes of the watershed of the Quebrada Verde in the Cordillera de TilarÃ¡n along Highway 142 about 15 km north of San Ramon in San Ramon Canton, Angeles District.			2007-07-05	D. H. Norris
Liverwort		110166 F	Syzygiella		Jamesoniellaceae	On moist, shaded leaf of Araceae along Trail "E" in cloud forest on moderate slopes of the watershed of the Quebrada Verde			2007-07-05	D. H. Norris
Liverwort	UC2053284	110229	Syzygiella		Jamesoniellaceae	On moist, sunny fencepost at crest of Trail "A" in cloud forest border adjacent to pastured lands on moderate slopes of the watershed of the Quebrada Verde			2007-07-05	D. H. Norris
Liverwort	UC2053285	110245	Syzygiella		Jamesoniellaceae	On very moist, shaded branch of shrub at crest of Trail "A" in cloud forest border adjacent to pastured lands on moderate slopes of the watershed of the Quebrada Verde in the Cordillera de TilarÃ¡n along Highway 142 about 15 km north of San Ramon in San Ramon Canton, Angeles District.			2007-07-05	D. H. Norris
Liverwort		110040	Aureolejeunea		Lejeuneaceae	On moist, rather sunny small tree at crest of Trail "A" in cloud forest border adjacent to pastured lands on moderate slopes of the watershed of the Quebrada Verde in the Cordillera de TilarÃ¡n along Highway 142 about 15 km north of San Ramon in San Ramon Canton, Angeles District.			2007-07-05	D. H. Norris
Liverwort		110202 B	Colura		Lejeuneaceae	On moist, rather sunny branch of shrub at crest of Trail "A" in cloud forest border adjacent to pastured lands on moderate slopes of the watershed of the Quebrada Verde			2007-07-05	D. H. Norris
Liverwort	UC2053749	17176	Acanthocoleus	aberrans	Lejeuneaceae	On trunk of tree at edge of cloud forest abutting on Dracaena plantation.			2010-03-11	Allen Risk
Liverwort	UC2053844	111040A	Anoplolejeunea		Lejeuneaceae	On bark of large tree in the Nectandra Gardens in area of cloud forest			2009-03-26	D. H. Norris
Liverwort		110086	Archilejeunea		Lejeuneaceae	On moist, shaded trunk of tree fern along Trail "E" in cloud forest on moderate slopes of the watershed of the Quebrada Verde in the Cordillera de TilarÃ¡n along Highway 142 about 15 km north of San Ramon in San Ramon Canton, Angeles District.			2007-07-05	D. H. Norris
Liverwort	UC2053311	110183	Aureolejeunea		Lejeuneaceae	On moist, sunny limbs of shrub at crest of Trail "A" in cloud forest border adjacent to pastured lands on moderate slopes of the watershed of the Quebrada Verde in the Cordillera de TilarÃ¡n along Highway 142 about 15 km north of San Ramon in San Ramon Canton, Angeles District.			2007-07-05	D. H. Norris
Liverwort	UC2053845	110167A	Brachiolejeunea		Lejeuneaceae	On moist, shaded branches of shrub along Trail "E" in cloud forest			2007-07-05	D. H. Norris
Liverwort	UC2053310	110263	Brachiolejeunea		Lejeuneaceae	On moist, rather shaded base of shrub at crest of Trail "A" in cloud forest border adjacent to pastured lands on moderate slopes of the watershed of the Quebrada Verde in the Cordillera de TilarÃ¡n along Highway 142 about 15 km north of San Ramon in San Ramon Canton, Angeles District.			2007-07-05	D. H. Norris
Liverwort	UC2053846	110396B	Brachiolejeunea		Lejeuneaceae	On moist, shaded twigs of recently fallen tree along intermittent stream along Trail "C" in cloud forest			2007-07-05	D. H. Norris
Liverwort	UC2053309	111214	Brachiolejeunea		Lejeuneaceae	On moist, diffusely lit base of tree in area of cloud forest			2010-03-11	D. H. Norris
Liverwort	UC2053208	110209	Bryopteris		Lejeuneaceae	On moist, shaded base of tree at crest of Trail "A" in cloud forest border adjacent to pastured lands on moderate slopes of the watershed of the Quebrada Verde			2007-07-05	D. H. Norris
Liverwort		110060	Bryopteris	filicina	Lejeuneaceae	On very moist, diffusely lit base of tree along Trail "E" in cloud forest on moderate slopes of the watershed of the Quebrada Verde in the Cordillera de TilarÃ¡n along Highway 142 about 15 km north of San Ramon in San Ramon Canton, Angeles District.			2007-07-05	D. H. Norris
Liverwort	UC2053206	110816	Bryopteris	filicina	Lejeuneaceae	On rather moist, sunny base of tree near headquarters of the Nectandra Reserve in cloud forest			2009-03-26	D. H. Norris
Liverwort	UC2053928	29	Bryopteris	filicina	Lejeuneaceae	On tree in the Nectandra Gardens in cloud forest.			2010-03-11	D. Lucas
Liverwort		110001E	Ceratolejeunea		Lejeuneaceae	On moist, diffusely lit leaf of palm along Trail "A" in cloud forest on moderate slopes of the watershed of the Quebrada Verde in the Cordillera de TilarÃ¡n along Highway 142 about 15 km north of San Ramon in San Ramon Canton, Angeles District.			2007-07-05	D. H. Norris
Liverwort		110043	Ceratolejeunea		Lejeuneaceae	On moist, rather sunny small tree at crest of Trail "A" in cloud forest border adjacent to pastured lands on moderate slopes of the watershed of the Quebrada Verde in the Cordillera de TilarÃ¡n along Highway 142 about 15 km north of San Ramon in San Ramon Canton, Angeles District.			2007-07-05	D. H. Norris
Liverwort		110160 C	Ceratolejeunea		Lejeuneaceae	On moist, shaded leaves along Trail "E" in cloud forest on moderate slopes of the watershed of the Quebrada Verde in the Cordillera de TilarÃ¡n along Highway 142 about 15 km north of San Ramon in San Ramon Canton, Angeles District.			2007-07-05	D. H. Norris
Liverwort		110226	Ceratolejeunea		Lejeuneaceae	On moist, sunny fencepost at crest of Trail "A" in cloud forest border adjacent to pastured lands on moderate slopes of the watershed of the Quebrada Verde			2007-07-05	D. H. Norris
Liverwort		110236B3	Ceratolejeunea		Lejeuneaceae	On moist, diffusely lit leaves of Commelinaceae at crest of Trail "A" in cloud forest border adjacent to pastured lands on moderate slopes of the watershed of the Quebrada Verde in the Cordillera de TilarÃ¡n along Highway 142 about 15 km north of San Ramon in San Ramon Canton, Angeles District.			2007-07-05	D. H. Norris
Liverwort		110248B	Ceratolejeunea		Lejeuneaceae	On very moist, shaded branch of shrub at crest of Trail "A" in cloud forest border adjacent to pastured lands on moderate slopes of the watershed of the Quebrada Verde in the Cordillera de TilarÃ¡n along Highway 142 about 15 km north of San Ramon in San Ramon Canton, Angeles District.			2007-07-05	D. H. Norris
Liverwort		110267	Ceratolejeunea		Lejeuneaceae	On moist, diffusely lit small tree at crest of Trail "A" in cloud forest border adjacent to pastured lands on moderate slopes of the watershed of the Quebrada Verde in the Cordillera de TilarÃ¡n along Highway 142 about 15 km north of San Ramon in San Ramon Canton, Angeles District.			2007-07-05	D. H. Norris
Liverwort		110344E	Ceratolejeunea		Lejeuneaceae	On moist, shaded leaf of fern along Trail "E" in cloud forest on moderate slopes of the watershed of the Quebrada Verde in the Cordillera de TilarÃ¡n along Highway 142 about 15 km north of San Ramon in San Ramon Canton, Angeles District.			2007-07-05	D. H. Norris
Liverwort		110378B	Ceratolejeunea		Lejeuneaceae	On moist, shaded leaf of palm along Trail "C" in cloud forest on moderate slopes of the watershed of the Quebrada Verde in the Cordillera de TilarÃ¡n along Highway 142 about 15 km north of San Ramon in San Ramon Canton, Angeles District.			2007-07-05	D. H. Norris
Liverwort		110426	Ceratolejeunea		Lejeuneaceae	On moist, shaded leaves of shrub along Trail "C" in cloud forest on moderate slopes of the watershed of the Quebrada Verde in the Cordillera de TilarÃ¡n along Highway 142 about 15 km north of San Ramon in San Ramon Canton, Angeles District.			2007-07-05	D. H. Norris
Liverwort		110487	Ceratolejeunea		Lejeuneaceae	On moist, shaded leaves of shrub at edge of cloud forest on moderate slopes of the watershed of the Quebrada Verde in the Cordillera de TilarÃ¡n at entrance to Nectandra Gardens along Highway 142 about 15 km north of San Ramon in San Ramon Canton, Angeles District.			2007-07-05	D. H. Norris
Liverwort		110541E	Ceratolejeunea		Lejeuneaceae	On moist, shaded leaves of palm in cloud forest along Trail "E" on moderate slopes of the watershed of the Quebrada Verde in the Cordillera de TilarÃ¡n at Nectandra Gardens along Highway 142 about 15 km north of San Ramon in San Ramon Canton, Angeles District.			2007-07-05	D. H. Norris
Liverwort	UC2054201	110002H	Ceratolejeunea		Lejeuneaceae	On leaves of shrub along Trail "A" in cloud forest.			2007-07-05	D. H. Norris
Liverwort	UC2053111	110148	Ceratolejeunea		Lejeuneaceae	On moist, shaded log along Trail "E" in cloud forest on moderate slopes of the watershed of the Quebrada Verde in the Cordillera de TilarÃ¡n along Highway 142 about 15 km north of San Ramon in San Ramon Canton, Angeles District.			2007-07-05	D. H. Norris
Liverwort	UC2053115	110155	Ceratolejeunea		Lejeuneaceae	On moist, diffusely lit branches of shrub along Trail "E" in cloud forest on moderate slopes of the watershed of the Quebrada Verde in the Cordillera de TilarÃ¡n along Highway 142 about 15 km north of San Ramon in San Ramon Canton, Angeles District.			2007-07-05	D. H. Norris
Liverwort	UC2054088	110167B	Ceratolejeunea		Lejeuneaceae	On moist, shaded branches of shrub along Trail "E" in cloud forest			2007-07-05	D. H. Norris
Liverwort	UC2053156	110228	Ceratolejeunea		Lejeuneaceae	On moist, sunny fencepost at crest of Trail "A" in cloud forest border adjacent to pastured lands on moderate slopes of the watershed of the Quebrada Verde			2007-07-05	D. H. Norris
Liverwort	UC2054087	110398F	Ceratolejeunea		Lejeuneaceae	On moist, shaded leaves of shrub along Trail "C" in cloud forest			2007-07-05	D. H. Norris
Liverwort	UC2053118	110404	Ceratolejeunea		Lejeuneaceae	On moist, shaded leaves of tree along intermittent stream along Trail "C" in cloud forest on moderate slopes of the watershed of the Quebrada Verde in the Cordillera de TilarÃ¡n along Highway 142 about 15 km north of San Ramon in San Ramon Canton, Angeles District.			2007-07-05	D. H. Norris
Liverwort	UC2053119	110408	Ceratolejeunea		Lejeuneaceae	On moist, shaded bark of small tree along Trail "C" in cloud forest on moderate slopes of the watershed of the Quebrada Verde in the Cordillera de TilarÃ¡n along Highway 142 about 15 km north of San Ramon in San Ramon Canton, Angeles District.			2007-07-05	D. H. Norris
Liverwort	UC2054090	110862C	Ceratolejeunea		Lejeuneaceae	Pendant from small shrub with cordate leaves in canyon near entra to the Nectandra Reserve where the small stream crosses the highway in cloud forest			2007-07-05	D. H. Norris
Liverwort	UC2053562	110927	Ceratolejeunea		Lejeuneaceae	On leaf of fern along creek at bridge in Nectandra Reserve.			2009-03-26	D. H. Norris
Liverwort	UC2053847	110930B	Ceratolejeunea		Lejeuneaceae	On leaf along creek at bridge in Nectandra Reserve			2009-03-26	D. H. Norris
Liverwort	UC2053123	110948	Ceratolejeunea		Lejeuneaceae	On moist, diffusely lit bark of tree in open area beyond rope bridge in Nectandra Reserve.			2009-03-26	D. H. Norris
Liverwort	UC2053120	111014	Ceratolejeunea		Lejeuneaceae	On leaf in the Ocotea portion of the Nectandra Gardens in area of cloud forest.			23 April- 7 May 2009
Liverwort	UC2053570	111216	Ceratolejeunea		Lejeuneaceae	On twigs of shrub in area of cloud forest.			2010-03-11	D. H. Norris
Liverwort	BRYOPHYTES AND LICHENS OF NECTANDRA CLOUD FOREST GARDEN ALAJUELA PROVINCE, COSTA RICA	110166 B	Ceratolejeunea	coarina	Lejeuneaceae	On moist, shaded leaf of Araceae along Trail "E" in cloud forest			2007-07-05	D. H. Norris
Liverwort	UC2053113	110192	Ceratolejeunea	coarina	Lejeuneaceae	On moist, sunny limbs of shrub at crest of Trail "A" in cloud forest border adjacent to pastured lands on moderate slopes of the watershed of the Quebrada Verde in the Cordillera de TilarÃ¡n along Highway 142 about 15 km north of San Ramon in San Ramon Canton, Angeles District.			2007-07-05	D. H. Norris
Liverwort	UC2053114	110225	Ceratolejeunea	coarina	Lejeuneaceae	On moist, sunny fencepost at crest of Trail "A" in cloud forest border adjacent to pastured lands on moderate slopes of the watershed of the Quebrada Verde			2007-07-05	D. H. Norris
Liverwort	UC2053116	110277	Ceratolejeunea	coarina	Lejeuneaceae	On moist, sunny fencepost at crest of Trail "A" in cloud forest border adjacent to pastured lands on moderate slopes of the watershed of the Quebrada Verde in the Cordillera de TilarÃ¡n along Highway 142 about 15 km north of San Ramon in San Ramon Canton, Angeles District.			2007-07-05	D. H. Norris
Liverwort	UC2053122	110409	Ceratolejeunea	cornuta	Lejeuneaceae	On moist, shaded bark of small tree along Trail "C" in cloud forest on moderate slopes of the watershed of the Quebrada Verde in the Cordillera de TilarÃ¡n along Highway 142 about 15 km north of San Ramon in San Ramon Canton, Angeles District.			2007-07-05	D. H. Norris
Liverwort	UC2054089	111087C	Ceratolejeunea	cornuta	Lejeuneaceae	On baark of tree in the nectandra Gardens in area of cloud forest			23 April- 7 May 2009
Liverwort	UC2053112	111095	Ceratolejeunea	cornuta	Lejeuneaceae	On sunny fencepost at edge of Ocotea portion of Nectandra Gardens in area of cloud forest			2009-04-23	D. H. Norris
Liverwort		109990 J	Ceratolejeunea	cornuta	Lejeuneaceae	On moist and shaded large tree along Trail "A" in cloud forest on moderate slopes of the watershed of the Quebrada Verde in the Cordillera de TilarÃ¡n along Highway 142 about 15 km north of San Ramon in San Ramon Canton, Angeles District.			2007-07-05	D. H. Norris
Liverwort		110243	Ceratolejeunea	cubensis	Lejeuneaceae	On moist, diffusely lit base of large and isolated tree at crest of Trail "A" in cloud forest border adjacent to pastured lands on moderate slopes of the watershed of the Quebrada Verde in the Cordillera de TilarÃ¡n along Highway 142 about 15 km north of San Ramon in San Ramon Canton, Angeles District.			2007-07-05	D. H. Norris
Liverwort	UC2054092	110243A	Ceratolejeunea	cubensis	Lejeuneaceae	On moist, diffusely lit base of large and isolated tree at crest of Trail "A" in cloud forest border			2007-07-05	D. H. Norris
Liverwort	UC2054166	110570D	Ceratolejeunea	cubensis	Lejeuneaceae	On moist, shaded leaf of shrub in cloud forest.			2007-07-05	D. H. Norris
Liverwort	UC2053102	110455	Ceratolejeunea	globulifera	Lejeuneaceae	On very moist, diffusely lit trunk of tree fern at edge of cloud forest on moderate slopes of the watershed of the Quebrada Verde in the Cordillera de TilarÃ¡n at entrance to Nectandra Gardens along Highway 142 about 15 km north of San Ramon in San Ramon Canton, Angeles District.			2007-07-05	D. H. Norris
Liverwort	UC2053773	17207	Ceratolejeunea	laete-fusca	Lejeuneaceae	On twigs of fallen tree near stream at edge of multilayered tropical cloud forest abutting on Dracaena plantation.			2010-03-11	D. H. Norris
Liverwort	UC2053121	110278	Ceratolejeunea	spinosa	Lejeuneaceae	On moist, sunny fencepost at crest of Trail "A" in cloud forest border adjacent to pastured lands on moderate slopes of the watershed of the Quebrada Verde in the Cordillera de TilarÃ¡n along Highway 142 about 15 km north of San Ramon in San Ramon Canton, Angeles District.			2007-07-05	D. H. Norris
Liverwort		110414G	Ceratolejeunea		Lejeuneaceae	On moist, rather shaded leaves along Trail "C" in cloud forest on moderate slopes of the watershed of the Quebrada Verde in the Cordillera de TilarÃ¡n along Highway 142 about 15 km north of San Ramon in San Ramon Canton, Angeles District.			2007-07-05	D. H. Norris
Liverwort	UC2053101	110513	Ceratolejeunea	rubiginosa	Lejeuneaceae	On very moist, rather shaded rock wall in cloud forest on moderate slopes of the watershed of the Quebrada Verde in the Cordillera de TilarÃ¡n near headquarters of Nectandra Gardens along Highway 142 about 15 km north of San Ramon in San Ramon Canton, Angeles District.			2007-07-05	D. H. Norris
Liverwort	UC2054292	110123 E	Chaetolejeunea		Lejeuneaceae	On moist, shaded leaf of Araceae along Trail "E" in cloud forest.			2007-07-05	D. H. Norris
Liverwort		110202 A	Chaetolejeunea		Lejeuneaceae	On moist, rather sunny branch of shrub at crest of Trail "A" in cloud forest border adjacent to pastured lands on moderate slopes of the watershed of the Quebrada Verde			2007-07-05	D. H. Norris
Liverwort		110020	Cheilolejeunea		Lejeuneaceae	On moist, diffusely lit branches of tree along Trail "A" in cloud forest on moderate slopes of the watershed of the Quebrada Verde in the Cordillera de TilarÃ¡n along Highway 142 about 15 km north of San Ramon in San Ramon Canton, Angeles District.			2007-07-05	D. H. Norris
Liverwort		110070D	Cheilolejeunea		Lejeuneaceae	On very moist, rather shaded leaf of Cyclanthes along Trail "E" in cloud forest on moderate slopes of the watershed of the Quebrada Verde in the Cordillera de TilarÃ¡n along Highway 142 about 15 km north of San Ramon in San Ramon Canton, Angeles District.			2007-07-05	D. H. Norris
Liverwort		110256	Cheilolejeunea		Lejeuneaceae	On moist, diffusely lit branches of small tree at crest of Trail "A" in cloud forest border adjacent to pastured lands on moderate slopes of the watershed of the Quebrada Verde in the Cordillera de TilarÃ¡n along Highway 142 about 15 km north of San Ramon in San Ramon Canton, Angeles District.			2007-07-05	D. H. Norris
Liverwort		110260	Cheilolejeunea		Lejeuneaceae	On moist, rather shaded base of shrub at crest of Trail "A" in cloud forest border adjacent to pastured lands on moderate slopes of the watershed of the Quebrada Verde in the Cordillera de TilarÃ¡n along Highway 142 about 15 km north of San Ramon in San Ramon Canton, Angeles District.			2007-07-05	D. H. Norris
Liverwort		110362	Cheilolejeunea		Lejeuneaceae	On moist, rather shaded rock wall along Trail "C" in cloud forest on moderate slopes of the watershed of the Quebrada Verde in the Cordillera de TilarÃ¡n along Highway 142 about 15 km north of San Ramon in San Ramon Canton, Angeles District.			2007-07-05	D. H. Norris
Liverwort	UC2054085	110191C	Cheilolejeunea		Lejeuneaceae	On moist, sunny limbs of shrub at crest of Trail "A" in cloud forest border adjacent to pastured lands			2007-07-05	D. H. Norris
Liverwort		110006G	Cololejeunea		Lejeuneaceae	On moist, diffusely lit leaves of tree along Trail "A" in cloud forest on moderate slopes of the watershed of the Quebrada Verde in the Cordillera de TilarÃ¡n along Highway 142 about 15 km north of San Ramon in San Ramon Canton, Angeles District.			2007-07-05	D. H. Norris
Liverwort		110057I	Cololejeunea		Lejeuneaceae	On leaves of shrub in cloud forest near headquarters of Nectandra Garden on moderate slopes of the watershed of the Quebrada Verde in the Cordillera de TilarÃ¡n along Highway 142 about 15 km north of San Ramon in San Ramon Canton, Angeles District.			2007-07-05	D. H. Norris
Liverwort	UC2053306	110557	Cololejeunea		Lejeuneaceae	On moist, shaded bark of tree in cloud forest along Trail "E" on moderate slopes of the watershed of the Quebrada Verde in the Cordillera de TilarÃ¡n at Nectandra Gardens along Highway 142 about 15 km north of San Ramon in San Ramon Canton, Angeles District.			2007-07-05	D. H. Norris
Liverwort	UC2053307	111243	Cololejeunea		Lejeuneaceae	On leaves of terrestrial orchid along Trail "A" of Nectandra Gardens in area of cloud forest			2010-03-11	D. H. Norris
Liverwort		110065D	Colura		Lejeuneaceae	On very moist, diffusely lit leaf of palm along Trail "E" in cloud forest on moderate slopes of the watershed of the Quebrada Verde in the Cordillera de TilarÃ¡n along Highway 142 about 15 km north of San Ramon in San Ramon Canton, Angeles District.			2007-07-05	D. H. Norris
Liverwort	UC2053308	110175	Colura		Lejeuneaceae	On moist, sunny fencepost at crest of Trail "A" in cloud forest border adjacent to pastured lands on moderate slopes of the watershed of the Quebrada Verde in the Cordillera de TilarÃ¡n along Highway 142 about 15 km north of San Ramon in San Ramon Canton, Angeles District.			2007-07-05	D. H. Norris
Liverwort		110236B4	Colura		Lejeuneaceae	On moist, diffusely lit leaves of Commelinaceae at crest of Trail "A" in cloud forest border adjacent to pastured lands on moderate slopes of the watershed of the Quebrada Verde in the Cordillera de TilarÃ¡n along Highway 142 about 15 km north of San Ramon in San Ramon Canton, Angeles District.			2007-07-05	D. H. Norris
Liverwort	UC2054030	111040F	Colura		Lejeuneaceae	On bark of large tree in the Nectandra Gardens in area of cloud forest			2007-07-05	D. H. Norris
Liverwort	UC2053304	110354	Crossotolejeunea		Lejeuneaceae	On moist, diffusely lit vertical face of boulder along Trail "E" in cloud forest on moderate slopes of the watershed of the Quebrada Verde in the Cordillera de TilarÃ¡n along Highway 142 about 15 km north of San Ramon in San Ramon Canton, Angeles District.			2007-07-05	D. H. Norris
Liverwort	UC2053690	110383	Crossotolejeunea		Lejeuneaceae	On moist, shaded bark of small tree along Trail "C" in cloud forest on moderate slopes of the watershed of the Quebrada Verde in the Cordillera de TilarÃ¡n along Highway 142 about 15 km north of San Ramon in San Ramon Canton, Angeles District.			2007-07-05	D. H. Norris
Liverwort		110001G	Cyclolejeunea		Lejeuneaceae	On moist, diffusely lit leaf of palm along Trail "A" in cloud forest on moderate slopes of the watershed of the Quebrada Verde in the Cordillera de TilarÃ¡n along Highway 142 about 15 km north of San Ramon in San Ramon Canton, Angeles District.			2007-07-05	D. H. Norris
Liverwort	UC2053571	110255	Cyclolejeunea		Lejeuneaceae	On moist, diffusely lit branches of small tree at crest of Trail "A" in cloud forest border adjacent to pastured lands on moderate slopes of the watershed of the Quebrada Verde in the Cordillera de TilarÃ¡n along Highway 142 about 15 km north of San Ramon in San Ramon Canton, Angeles District.			2007-07-05	D. H. Norris
Liverwort		110339E	Cyclolejeunea		Lejeuneaceae	On moist, shaded leaves along Trail "E" in cloud forest on moderate slopes of the watershed of the Quebrada Verde in the Cordillera de TilarÃ¡n along Highway 142 about 15 km north of San Ramon in San Ramon Canton, Angeles District.			2007-07-05	D. H. Norris
Liverwort		110378A	Cyclolejeunea		Lejeuneaceae	On moist, shaded leaf of palm along Trail "C" in cloud forest on moderate slopes of the watershed of the Quebrada Verde in the Cordillera de TilarÃ¡n along Highway 142 about 15 km north of San Ramon in San Ramon Canton, Angeles District.			2007-07-05	D. H. Norris
Liverwort	UC2054081	110402M	Cyclolejeunea		Lejeuneaceae	On moist, shaded leaves of shrub along Trail "C" in cloud forest			2007-07-05	D. H. Norris
Liverwort	UC2053563	111098	Cyclolejeunea		Lejeuneaceae	On sunny fencepost at edge of Ocotea portion of Nectandra Gardens in area of cloud forest.			23 April- 7 May 2009
Liverwort	UC2054293	110123F	Cyclolejeunea		Lejeuneaceae	On moist, shaded leaf of Araceae along Trail "E" in cloud forest.			2007-07-05	D. H. Norris
Liverwort	UC2054294	110123G	Cyclolejeunea		Lejeuneaceae	On moist, shaded leaf of Araceae along Trail "E" in cloud forest.			2007-07-05	D. H. Norris
Liverwort	UC2054165	110570C	Cyclolejeunea		Lejeuneaceae	On moist, shaded leaf of shrub in cloud forest.			2007-07-05	D. H. Norris
Liverwort		110047A	Cyclolejeunea	convexistipa	Lejeuneaceae	On moist, sunny twigs of shrub at crest of Trail "A" in cloud forest border adjacent to pastured lands on moderate slopes of the watershed of the Quebrada Verde in the Cordillera de TilarÃ¡n along Highway 142 about 15 km north of San Ramon in San Ramon Canton, Angeles District.			2007-07-05	D. H. Norris
Liverwort		110019	Cyclolejeunea	peruviana	Lejeuneaceae	On moist, diffusely lit leaves of tree along Trail "A" in cloud forest on moderate slopes of the watershed of the Quebrada Verde in the Cordillera de TilarÃ¡n along Highway 142 about 15 km north of San Ramon in San Ramon Canton, Angeles District.			2007-07-05	D. H. Norris
Liverwort	UC2053691	110384	Cystolejeunea		Lejeuneaceae	On moist, shaded bark of small tree along Trail "C" in cloud forest on moderate slopes of the watershed of the Quebrada Verde in the Cordillera de TilarÃ¡n along Highway 142 about 15 km north of San Ramon in San Ramon Canton, Angeles District.			2007-07-05	D. H. Norris
Liverwort	UC2053303	111046	Cystolejeunea		Lejeuneaceae	On bark of large tree in the Nectandra Gardens in area of cloud forest			2009-04-23	D. H. Norris
Liverwort	UC2053850	111087A	Cystolejeunea		Lejeuneaceae	On bark of tree in the Nectandra Gardens in area of cloud forest			2007-07-05	D. H. Norris
Liverwort	UC2054017	36	Cystolejeunea	lineata	Lejeuneaceae	Pendent from tree branch in the Nectandra Gardens in cloud forest.			2010-03-11	P. Nonkulolu
Liverwort		110065G	Dactylolejeunea		Lejeuneaceae	On very moist, diffusely lit leaf of palm along Trail "E" in cloud forest on moderate slopes of the watershed of the Quebrada Verde in the Cordillera de TilarÃ¡n along Highway 142 about 15 km north of San Ramon in San Ramon Canton, Angeles District.			2007-07-05	D. H. Norris
Liverwort	UC2054098	110195B	Dicranolejeunea		Lejeuneaceae	On moist, sunny twigs of shrub at crest of Trail "A" in cloud forest border adjacent to pastured lands			2007-07-05	D. H. Norris
Liverwort	UC2054099	110398C	Dicranolejeunea		Lejeuneaceae	On moist, shaded leaves of shrub along Trail "C" in cloud forest			2007-07-05	D. H. Norris
Liverwort	UC2053213	111205	Dicranolejeunea		Lejeuneaceae	On moist, diffusely lit base of tree in area of cloud forest			2010-03-11	D. H. Norris
Liverwort	UC2054100	110824B	Dicranolejeunea		Lejeuneaceae	On leaf of Rubiaceae along boundary of the Nectandra Reserve at top of Trail "A" in cloud forest			2009-03-26	D. H. Norris
Liverwort	UC2054100	110842	Dicranolejeunea		Lejeuneaceae	On leaf Rubiaceae along boundary of the Nectandra Reserveat top of Trail "A" in cloud forest.			March 26 2009	D. H. Norris
Liverwort	UC2053807	57	Dicranolejeunea	axillaris	Lejeuneaceae	On bark of tree in creek near headquarters of the Nectandra Gardens.			2010-03-11	Freddy Castillo
Liverwort	UC2054199	110001F	Drepanolejeunea		Lejeuneaceae	On moist, diffusely lit leaf of palm along Trail "A" in cloud forest on moderate slopes of the watershed of the Quebrada Verde in the Cordillera de TilarÃ¡n along Highway 142 about 15 km north of San Ramon in San Ramon Canton, Angeles District.			2007-07-05	D. H. Norris
Liverwort		110065A	Drepanolejeunea		Lejeuneaceae	On very moist, diffusely lit leaf of palm along Trail "E" in cloud forest on moderate slopes of the watershed of the Quebrada Verde in the Cordillera de TilarÃ¡n along Highway 142 about 15 km north of San Ramon in San Ramon Canton, Angeles District.			2007-07-05	D. H. Norris
Liverwort		110236 B1	Drepanolejeunea		Lejeuneaceae	On moist, diffusely lit leaves of Commelinaceae at crest of Trail "A" in cloud forest border adjacent to pastured lands on moderate slopes of the watershed of the Quebrada Verde			2007-07-05	D. H. Norris
Liverwort		110236B1	Drepanolejeunea		Lejeuneaceae	On moist, diffusely lit leaves of Commelinaceae at crest of Trail "A" in cloud forest border adjacent to pastured lands on moderate slopes of the watershed of the Quebrada Verde in the Cordillera de TilarÃ¡n along Highway 142 about 15 km north of San Ramon in San Ramon Canton, Angeles District.			2007-07-05	D. H. Norris
Liverwort		110236B2	Drepanolejeunea		Lejeuneaceae	On moist, diffusely lit leaves of Commelinaceae at crest of Trail "A" in cloud forest border adjacent to pastured lands on moderate slopes of the watershed of the Quebrada Verde in the Cordillera de TilarÃ¡n along Highway 142 about 15 km north of San Ramon in San Ramon Canton, Angeles District.			2007-07-05	D. H. Norris
Liverwort		110323A	Drepanolejeunea		Lejeuneaceae	On moist, diffusely lit leaves of palm in tree-fall opening along Trail "E" in cloud forest on moderate slopes of the watershed of the Quebrada Verde in the Cordillera de TilarÃ¡n along Highway 142 about 15 km north of San Ramon in San Ramon Canton, Angeles District.			2007-07-05	D. H. Norris
Liverwort		110463	Drepanolejeunea		Lejeuneaceae	On moist, shaded leaf of Araceae at edge of cloud forest on moderate slopes of the watershed of the Quebrada Verde in the Cordillera de TilarÃ¡n at entrance to Nectandra Gardens along Highway 142 about 15 km north of San Ramon in San Ramon Canton, Angeles District.			2007-07-05	D. H. Norris
Liverwort	UC2054205	110002L	Drepanolejeunea		Lejeuneaceae	On leaves of shrub along Trail "A" in cloud forest.			2007-07-05	D. H. Norris
Liverwort	UC2054163	110570A	Drepanolejeunea		Lejeuneaceae	On moist, shaded leaf of shrub in cloud forest.			2007-07-05	D. H. Norris
Liverwort	UC2054200	110002F	Drepanolejeunea	aculeata	Lejeuneaceae	On leaves of shrub along Trail "A" in cloud forest.			2007-07-05	D. H. Norris
Liverwort		110044D	Drepanolejeunea	aculeata	Lejeuneaceae	On moist, sunny limb of tree at crest of Trail "A" in cloud forest border adjacent to pastured lands on moderate slopes of the watershed of the Quebrada Verde in the Cordillera de TilarÃ¡n along Highway 142 about 15 km north of San Ramon in San Ramon Canton, Angeles District.			2007-07-05	D. H. Norris
Liverwort	UC2054052	110159D	Echinocolea		Lejeuneaceae	On moist, shaded horizontal limb of shrub along Trail "E" in cloud forest			2007-07-05	D. H. Norris
Liverwort		110047B	Harpalejeunea		Lejeuneaceae	On moist, sunny twigs of shrub at crest of Trail "A" in cloud forest border adjacent to pastured lands on moderate slopes of the watershed of the Quebrada Verde in the Cordillera de TilarÃ¡n along Highway 142 about 15 km north of San Ramon in San Ramon Canton, Angeles District.			2007-07-05	D. H. Norris
Liverwort		110166 D	Harpalejeunea		Lejeuneaceae	On moist, shaded leaf of Araceae along Trail "E" in cloud forest on moderate slopes of the watershed of the Quebrada Verde			2007-07-05	D. H. Norris
Liverwort	BRYOPHYTES AND LICHENS OF NECTANDRA CLOUD FOREST GARDEN ALAJUELA PROVINCE, COSTA RICA	110166 C	Harpalejeunea		Lejeuneaceae	On moist, shaded leaf of Araceae along Trail "E" in cloud forest			2007-07-05	D. H. Norris
Liverwort	UC2054028	110853P	Harpalejeunea		Lejeuneaceae	On leaf at base of Trail "A' in the Nectandra Reserve in cloud forest			2009-03-26	D. H. Norris
Liverwort	UC2053301	110472	Heterolejeunea		Lejeuneaceae	On moist, sunny twig of Blakea at edge of cloud forest on moderate slopes of the watershed of the Quebrada Verde in the Cordillera de TilarÃ¡n at entrance to Nectandra Gardens along Highway 142 about 15 km north of San Ramon in San Ramon Canton, Angeles District.			2007-07-05	D. H. Norris
Liverwort	UC2053302	110193	Heterolejeunea		Lejeuneaceae	On moist, sunny limbs of shrub at crest of Trail "A" in cloud forest border adjacent to pastured lands on moderate slopes of the watershed of the Quebrada Verde in the Cordillera de TilarÃ¡n along Highway 142 about 15 km north of San Ramon in San Ramon Canton, Angeles District.			2007-07-05	D. H. Norris
Liverwort		109991 M	Lejeunea		Lejeuneaceae	On moist and shaded leaves of epiphyte along Trail "A" in cloud forest on moderate slopes of the watershed of the Quebrada Verde in the Cordillera de TilarÃ¡n along Highway 142 about 15 km north of San Ramon in San Ramon Canton, Angeles District.			2007-07-05	D. H. Norris
Liverwort	UC2053576	110029	Lejeunea		Lejeuneaceae	On moist, diffusely lit bark of sapling at crest of Trail "A" in cloud forest border adjacent to pastured lands on moderate slopes of the watershed of the Quebrada Verde in the Cordillera de TilarÃ¡n along Highway 142 about 15 km north of San Ramon in San Ramon Canton, Angeles District.			2007-07-05	D. H. Norris
Liverwort		110057F	Lejeunea		Lejeuneaceae	On leaves of shrub in cloud forest near headquarters of Nectandra Garden on moderate slopes of the watershed of the Quebrada Verde in the Cordillera de TilarÃ¡n along Highway 142 about 15 km north of San Ramon in San Ramon Canton, Angeles District.			2007-07-05	D. H. Norris
Liverwort		110065C	Lejeunea		Lejeuneaceae	On very moist, diffusely lit leaf of palm along Trail "E" in cloud forest on moderate slopes of the watershed of the Quebrada Verde in the Cordillera de TilarÃ¡n along Highway 142 about 15 km north of San Ramon in San Ramon Canton, Angeles District.			2007-07-05	D. H. Norris
Liverwort		110103	Lejeunea		Lejeuneaceae	On very moist, shaded twigs of shrub along Trail "E" in cloud forest on moderate slopes of the watershed of the Quebrada Verde in the Cordillera de TilarÃ¡n along Highway 142 about 15 km north of San Ramon in San Ramon Canton, Angeles District.			2007-07-05	D. H. Norris
Liverwort		110154	Lejeunea		Lejeuneaceae	On moist, diffusely lit branches of shrub along Trail "E" in cloud forest on moderate slopes of the watershed of the Quebrada Verde in the Cordillera de TilarÃ¡n along Highway 142 about 15 km north of San Ramon in San Ramon Canton, Angeles District.			2007-07-05	D. H. Norris
Liverwort		110159	Lejeunea		Lejeuneaceae	On moist, shaded horizontal limb of shrub along Trail "E" in cloud forest on moderate slopes of the watershed of the Quebrada Verde in the Cordillera de TilarÃ¡n along Highway 142 about 15 km north of San Ramon in San Ramon Canton, Angeles District.			2007-07-05	D. H. Norris
Liverwort		110167	Lejeunea		Lejeuneaceae	On moist, shaded branches of shrub along Trail "E" in cloud forest on moderate slopes of the watershed of the Quebrada Verde			2007-07-05	D. H. Norris
Liverwort		110189	Lejeunea		Lejeuneaceae	On moist, sunny limbs of shrub at crest of Trail "A" in cloud forest border adjacent to pastured lands on moderate slopes of the watershed of the Quebrada Verde in the Cordillera de TilarÃ¡n along Highway 142 about 15 km north of San Ramon in San Ramon Canton, Angeles District.			2007-07-05	D. H. Norris
Liverwort		110194	Lejeunea		Lejeuneaceae	On moist, sunny leaves of shrub at crest of Trail "A" in cloud forest border adjacent to pastured lands on moderate slopes of the watershed of the Quebrada Verde in the Cordillera de TilarÃ¡n along Highway 142 about 15 km north of San Ramon in San Ramon Canton, Angeles District.			2007-07-05	D. H. Norris
Liverwort		111203	Lejeunea		Lejeuneaceae	On moist, rather sunny branch of shrub at crest of Trail "A" in cloud forest border adjacent to pastured lands on moderate slopes of the watershed of the Quebrada Verde			2007-07-05	D. H. Norris
Liverwort		111204	Lejeunea		Lejeuneaceae	On moist, diffusely lit twig of shrub at crest of Trail "A" in cloud forest border adjacent to pastured lands on moderate slopes of the watershed of the Quebrada Verde			2007-07-05	D. H. Norris
Liverwort		110336	Lejeunea		Lejeuneaceae	On moist, shaded stones along Trail "E" in cloud forest on moderate slopes of the watershed of the Quebrada Verde in the Cordillera de TilarÃ¡n along Highway 142 about 15 km north of San Ramon in San Ramon Canton, Angeles District.			2007-07-05	D. H. Norris
Liverwort		110337	Lejeunea		Lejeuneaceae	On moist, shaded root of small tree along Trail "E" in cloud forest on moderate slopes of the watershed of the Quebrada Verde in the Cordillera de TilarÃ¡n along Highway 142 about 15 km north of San Ramon in San Ramon Canton, Angeles District.			2007-07-05	D. H. Norris
Liverwort		110386	Lejeunea		Lejeuneaceae	On moist, shaded bark of small tree along Trail "C" in cloud forest on moderate slopes of the watershed of the Quebrada Verde in the Cordillera de TilarÃ¡n along Highway 142 about 15 km north of San Ramon in San Ramon Canton, Angeles District.			2007-07-05	D. H. Norris
Liverwort		110417A	Lejeunea		Lejeuneaceae	On moist, shaded leaves of shrub along Trail "C" in cloud forest on moderate slopes of the watershed of the Quebrada Verde in the Cordillera de TilarÃ¡n along Highway 142 about 15 km north of San Ramon in San Ramon Canton, Angeles District.			2007-07-05	D. H. Norris
Liverwort		110470	Lejeunea		Lejeuneaceae	On moist, sunny twig of Blakea at edge of cloud forest on moderate slopes of the watershed of the Quebrada Verde in the Cordillera de TilarÃ¡n at entrance to Nectandra Gardens along Highway 142 about 15 km north of San Ramon in San Ramon Canton, Angeles District.			2007-07-05	D. H. Norris
Liverwort		110476	Lejeunea		Lejeuneaceae	On moist, diffusely lit twigs at edge of cloud forest on moderate slopes of the watershed of the Quebrada Verde in the Cordillera de TilarÃ¡n at entrance to Nectandra Gardens along Highway 142 about 15 km north of San Ramon in San Ramon Canton, Angeles District.			2007-07-05	D. H. Norris
Liverwort		110483	Lejeunea		Lejeuneaceae	On moist, diffusely lit twigs at edge of cloud forest on moderate slopes of the watershed of the Quebrada Verde in the Cordillera de TilarÃ¡n at entrance to Nectandra Gardens along Highway 142 about 15 km north of San Ramon in San Ramon Canton, Angeles District.			2007-07-05	D. H. Norris
Liverwort	UC2053261	110536	Lejeunea		Lejeuneaceae	On moist, shaded boulder along trail in cloud forest along Trail "E" on moderate slopes of the watershed of the Quebrada Verde in the Cordillera de TilarÃ¡n at Nectandra Gardens along Highway 142 about 15 km north of San Ramon in San Ramon Canton, Angeles District.			2007-07-05	D. H. Norris
Liverwort		110540	Lejeunea		Lejeuneaceae	On moist, shaded leaves of shrub along trail in cloud forest along Trail "E" on moderate slopes of the watershed of the Quebrada Verde in the Cordillera de TilarÃ¡n at Nectandra Gardens along Highway 142 about 15 km north of San Ramon in San Ramon Canton, Angeles District.			2007-07-05	D. H. Norris
Liverwort		110553	Lejeunea		Lejeuneaceae	On moist, shaded bark of tree in cloud forest along Trail "E" on moderate slopes of the watershed of the Quebrada Verde in the Cordillera de TilarÃ¡n at Nectandra Gardens along Highway 142 about 15 km north of San Ramon in San Ramon Canton, Angeles District.			2007-07-05	D. H. Norris
Liverwort		110564	Lejeunea		Lejeuneaceae	On moist, shaded stembark of tree in cloud forest along Trail "E" on moderate slopes of the watershed of the Quebrada Verde in the Cordillera de TilarÃ¡n at Nectandra Gardens along Highway 142 about 15 km north of San Ramon in San Ramon Canton, Angeles District.			2007-07-05	D. H. Norris
Liverwort		110567	Lejeunea		Lejeuneaceae	On moist, shaded rock beside trail in cloud forest along Trail "E" on moderate slopes of the watershed of the Quebrada Verde in the Cordillera de TilarÃ¡n at Nectandra Gardens along Highway 142 about 15 km north of San Ramon in San Ramon Canton, Angeles District.			2007-07-05	D. H. Norris
Liverwort	UC2053144	111067	Lejeunea	holostipa	Lejeuneaceae	On trunk of tree in the Nectandra Gardens in area of cloud forest			2009-04-23	D. H. Norris
Liverwort	UC2053610	109957	Lejeunea		Lejeuneaceae	On stem of epiphyte in cloud forest along road near entrance gate to Nectandra Garden on moderate slopes of the watershed of the Quebrada Verde in the Cordillera de TilarÃ¡n along Highway 142 about 15 km north of San Ramon in San Ramon Canton, Angeles District.			2007-07-05	D. H. Norris
Liverwort	UC2053204	109965	Lejeunea		Lejeuneaceae	On boulder at edge of road in cloud forest along road near entrance gate to Nectandra Garden on moderate slopes of the watershed of the Quebrada Verde in the Cordillera de TilarÃ¡n along Highway 142 about 15 km north of San Ramon in San Ramon Canton, Angeles District.			2007-07-05	D. H. Norris
Liverwort	UC2053577	109987	Lejeunea		Lejeuneaceae	On leaves of shrub of Psychotria along Trail "A" in cloud forest on moderate slopes of the watershed of the Quebrada Verde in the Cordillera de TilarÃ¡n along Highway 142 about 15 km north of San Ramon in San Ramon Canton, Angeles District.			2007-07-05	D. H. Norris
Liverwort	UC2053890	109993	Lejeunea		Lejeuneaceae	On moist and shaded twig of shrub along Trail "A" in cloud forest on moderate slopes of the watershed of the Quebrada Verde in the Cordillera de TilarÃ¡n along Highway 142 about 15 km north of San Ramon in San Ramon Canton, Angeles District.			2007-07-05	D. H. Norris
Liverwort	UC2053574	110048	Lejeunea		Lejeuneaceae	On moist, sunny twigs of shrub at crest of Trail "A" in cloud forest border adjacent to pastured lands on moderate slopes of the watershed of the Quebrada Verde in the Cordillera de TilarÃ¡n along Highway 142 about 15 km north of San Ramon in San Ramon Canton, Angeles District.			2007-07-05	D. H. Norris
Liverwort	UC2053565	110050	Lejeunea		Lejeuneaceae	On moist, sunny twigs of shrub at crest of Trail "A" in cloud forest border adjacent to pastured lands on moderate slopes of the watershed of the Quebrada Verde in the Cordillera de TilarÃ¡n along Highway 142 about 15 km north of San Ramon in San Ramon Canton, Angeles District.			2007-07-05	D. H. Norris
Liverwort	UC2053675	110101	Lejeunea		Lejeuneaceae	On moist, diffusely lit top of large rock in stream along Trail "E" in cloud forest on moderate slopes of the watershed of the Quebrada Verde in the Cordillera de TilarÃ¡n along Highway 142 about 15 km north of San Ramon in San Ramon Canton, Angeles District.			2007-07-05	D. H. Norris
Liverwort	UC2053573	110111	Lejeunea		Lejeuneaceae	Pendent from moist, shaded twigs of shrub along Trail "E" in cloud forest on moderate slopes of the watershed of the Quebrada Verde in the Cordillera de TilarÃ¡n along Highway 142 about 15 km north of San Ramon in San Ramon Canton, Angeles District.			2007-07-05	D. H. Norris
Liverwort	UC2054300	110126F	Lejeunea		Lejeuneaceae	On moist, shaded leaves of fern along Trail "E" in cloud forest.			2007-07-05	D. H. Norris
Liverwort	UC2053567	110127	Lejeunea		Lejeuneaceae	On moist, shaded leaves of fern along Trail "E" in cloud forest on moderate slopes of the watershed of the Quebrada Verde in the Cordillera de TilarÃ¡n along Highway 142 about 15 km north of San Ramon in San Ramon Canton, Angeles District.			2007-07-05	D. H. Norris
Liverwort	UC2053566	110135	Lejeunea		Lejeuneaceae	Pendent from moist, shaded branches of shrub along Trail "E" in cloud forest on moderate slopes of the watershed of the Quebrada Verde in the Cordillera de TilarÃ¡n along Highway 142 about 15 km north of San Ramon in San Ramon Canton, Angeles District.			2007-07-05	D. H. Norris
Liverwort	UC2053305	110157	Lejeunea		Lejeuneaceae	On moist, shaded leaves of fern along Trail "E" in cloud forest on moderate slopes of the watershed of the Quebrada Verde			2007-07-05	D. H. Norris
Liverwort	UC2053136	110182	Lejeunea		Lejeuneaceae	On moist, rather sunny leaves of shrub at crest of Trail "A" in cloud forest border adjacent to pastured lands on moderate slopes of the watershed of the Quebrada Verde in the Cordillera de TilarÃ¡n along Highway 142 about 15 km north of San Ramon in San Ramon Canton, Angeles District.			2007-07-05	D. H. Norris
Liverwort	UC2053130	110186	Lejeunea		Lejeuneaceae	On moist, sunny limbs of shrub at crest of Trail "A" in cloud forest border adjacent to pastured lands on moderate slopes of the watershed of the Quebrada Verde in the Cordillera de TilarÃ¡n along Highway 142 about 15 km north of San Ramon in San Ramon Canton, Angeles District.			2007-07-05	D. H. Norris
Liverwort	UC2053131	110187	Lejeunea		Lejeuneaceae	On moist, sunny limbs of shrub at crest of Trail "A" in cloud forest border adjacent to pastured lands on moderate slopes of the watershed of the Quebrada Verde in the Cordillera de TilarÃ¡n along Highway 142 about 15 km north of San Ramon in San Ramon Canton, Angeles District.			2007-07-05	D. H. Norris
Liverwort	UC2053132	110188	Lejeunea		Lejeuneaceae	On moist, sunny limbs of shrub at crest of Trail "A" in cloud forest border adjacent to pastured lands on moderate slopes of the watershed of the Quebrada Verde in the Cordillera de TilarÃ¡n along Highway 142 about 15 km north of San Ramon in San Ramon Canton, Angeles District.			2007-07-05	D. H. Norris
Liverwort	UC2053133	110190	Lejeunea		Lejeuneaceae	On moist, sunny limbs of shrub at crest of Trail "A" in cloud forest border adjacent to pastured lands on moderate slopes of the watershed of the Quebrada Verde in the Cordillera de TilarÃ¡n along Highway 142 about 15 km north of San Ramon in San Ramon Canton, Angeles District.			2007-07-05	D. H. Norris
Liverwort	UC2054079	110215A	Lejeunea		Lejeuneaceae	On moist, diffusely lit twig of shrub at crest of Trail "A" in cloud forest border adjacent to pastured lands			2007-07-05	D. H. Norris
Liverwort	UC2053127	110220	Lejeunea		Lejeuneaceae	On moist, sunny fencepost at crest of Trail "A" in cloud forest border adjacent to pastured lands on moderate slopes of the watershed of the Quebrada Verde			2007-07-05	D. H. Norris
Liverwort	UC2053103	110231	Lejeunea		Lejeuneaceae	On moist, sunny fencepost at crest of Trail "A" in cloud forest border adjacent to pastured lands on moderate slopes of the watershed of the Quebrada Verde			2007-07-05	D. H. Norris
Liverwort	UC2053207	110232	Lejeunea		Lejeuneaceae	On moist, sunny fencepost at crest of Trail "A" in cloud forest border adjacent to pastured lands on moderate slopes of the watershed of the Quebrada Verde			2007-07-05	D. H. Norris
Liverwort	UC2054084	110237A	Lejeunea		Lejeuneaceae	On moist, diffusely lit twigs of shrub at crest of Trail "A" in cloud forest border			2007-07-05	D. H. Norris
Liverwort	UC2053155	110241	Lejeunea		Lejeuneaceae	On moist, diffusely lit base of large and isolated tree at crest of Trail "A" in cloud forest border adjacent to pastured lands on moderate slopes of the watershed of the Quebrada Verde in the Cordillera de TilarÃ¡n along Highway 142 about 15 km north of San Ramon in San Ramon Canton, Angeles District.			2007-07-05	D. H. Norris
Liverwort	UC2053139	110242	Lejeunea		Lejeuneaceae	On moist, diffusely lit base of large and isolated tree at crest of Trail "A" in cloud forest border adjacent to pastured lands on moderate slopes of the watershed of the Quebrada Verde in the Cordillera de TilarÃ¡n along Highway 142 about 15 km north of San Ramon in San Ramon Canton, Angeles District.			2007-07-05	D. H. Norris
Liverwort	UC2053137	110246	Lejeunea		Lejeuneaceae	On very moist, shaded branch of shrub at crest of Trail "A" in cloud forest border adjacent to pastured lands on moderate slopes of the watershed of the Quebrada Verde in the Cordillera de TilarÃ¡n along Highway 142 about 15 km north of San Ramon in San Ramon Canton, Angeles District.			2007-07-05	D. H. Norris
Liverwort	UC2053652	110275	Lejeunea		Lejeuneaceae	On moist, sunny fencepost at crest of Trail "A" in cloud forest border adjacent to pastured lands on moderate slopes of the watershed of the Quebrada Verde in the Cordillera de TilarÃ¡n along Highway 142 about 15 km north of San Ramon in San Ramon Canton, Angeles District.			2007-07-05	D. H. Norris
Liverwort	UC2053146	110276	Lejeunea		Lejeuneaceae	On moist, sunny fencepost at crest of Trail "A" in cloud forest border adjacent to pastured lands on moderate slopes of the watershed of the Quebrada Verde in the Cordillera de TilarÃ¡n along Highway 142 about 15 km north of San Ramon in San Ramon Canton, Angeles District.			2007-07-05	D. H. Norris
Liverwort	UC2053141	110279	Lejeunea		Lejeuneaceae	On moist, sunny fencepost at crest of Trail "A" in cloud forest border adjacent to pastured lands on moderate slopes of the watershed of the Quebrada Verde in the Cordillera de TilarÃ¡n along Highway 142 about 15 km north of San Ramon in San Ramon Canton, Angeles District.			2007-07-05	D. H. Norris
Liverwort	UC2053154	110324	Lejeunea		Lejeuneaceae	On moist, diffusely lit large log along Trail "E" in cloud forest on moderate slopes of the watershed of the Quebrada Verde in the Cordillera de TilarÃ¡n along Highway 142 about 15 km north of San Ramon in San Ramon Canton, Angeles District.			2007-07-05	D. H. Norris
Liverwort	UC2053295	110368	Lejeunea		Lejeuneaceae	On moist, diffusely lit rock wall along Trail "C" in cloud forest on moderate slopes of the watershed of the Quebrada Verde in the Cordillera de TilarÃ¡n along Highway 142 about 15 km north of San Ramon in San Ramon Canton, Angeles District.			2007-07-05	D. H. Norris
Liverwort	UC2053609	110418	Lejeunea		Lejeuneaceae	On moist, shaded bark of tree along Trail "C" in cloud forest on moderate slopes of the watershed of the Quebrada Verde in the Cordillera de TilarÃ¡n along Highway 142 about 15 km north of San Ramon in San Ramon Canton, Angeles District.			2007-07-05	D. H. Norris
Liverwort	UC2053849	110420H	Lejeunea		Lejeuneaceae	On moist, shaded leaves of shrub along Trail "C" in cloud forest			2007-07-05	D. H. Norris
Liverwort	UC2053151	110436	Lejeunea		Lejeuneaceae	On moist, shaded tree along Trail "C" in cloud forest on moderate slopes of the watershed of the Quebrada Verde in the Cordillera de TilarÃ¡n along Highway 142 about 15 km north of San Ramon in San Ramon Canton, Angeles District.			2007-07-05	D. H. Norris
Liverwort	UC2053153	110456	Lejeunea		Lejeuneaceae	On very moist, diffusely lit trunk of tree fern at edge of cloud forest on moderate slopes of the watershed of the Quebrada Verde in the Cordillera de TilarÃ¡n at entrance to Nectandra Gardens along Highway 142 about 15 km north of San Ramon in San Ramon Canton, Angeles District.			2007-07-05	D. H. Norris
Liverwort	UC2053607	110460	Lejeunea		Lejeuneaceae	On moist, rather shaded trunk of tree fern at edge of cloud forest on moderate slopes of the watershed of the Quebrada Verde in the Cordillera de TilarÃ¡n at entrance to Nectandra Gardens along Highway 142 about 15 km north of San Ramon in San Ramon Canton, Angeles District.			2007-07-05	D. H. Norris
Liverwort	UC2053152	110471	Lejeunea		Lejeuneaceae	On moist, sunny twig of Blakea at edge of cloud forest on moderate slopes of the watershed of the Quebrada Verde in the Cordillera de TilarÃ¡n at entrance to Nectandra Gardens along Highway 142 about 15 km north of San Ramon in San Ramon Canton, Angeles District.			2007-07-05	D. H. Norris
Liverwort	UC2053150	110482	Lejeunea		Lejeuneaceae	On moist, diffusely lit twigs at edge of cloud forest on moderate slopes of the watershed of the Quebrada Verde in the Cordillera de TilarÃ¡n at entrance to Nectandra Gardens along Highway 142 about 15 km north of San Ramon in San Ramon Canton, Angeles District.			2007-07-05	D. H. Norris
Liverwort	UC2053258	110486	Lejeunea		Lejeuneaceae	On moist, diffusely lit bark of tree at edge of cloud forest on moderate slopes of the watershed of the Quebrada Verde in the Cordillera de TilarÃ¡n at entrance to Nectandra Gardens along Highway 142 about 15 km north of San Ramon in San Ramon Canton, Angeles District.			2007-07-05	D. H. Norris
Liverwort	UC2053149	110488	Lejeunea		Lejeuneaceae	On moist, shaded bark of small tree at edge of cloud forest on moderate slopes of the watershed of the Quebrada Verde in the Cordillera de TilarÃ¡n at entrance to Nectandra Gardens along Highway 142 about 15 km north of San Ramon in San Ramon Canton, Angeles District.			2007-07-05	D. H. Norris
Liverwort	UC2053147	110495	Lejeunea		Lejeuneaceae	On moist, shaded bark of tree at edge of cloud forest on moderate slopes of the watershed of the Quebrada Verde in the Cordillera de TilarÃ¡n at entrance to Nectandra Gardens along Highway 142 about 15 km north of San Ramon in San Ramon Canton, Angeles District.			2007-07-05	D. H. Norris
Liverwort	UC2053321	110535	Lejeunea		Lejeuneaceae	On moist, shaded boulder along trail in cloud forest along Trail "E" on moderate slopes of the watershed of the Quebrada Verde in the Cordillera de TilarÃ¡n at Nectandra Gardens along Highway 142 about 15 km north of San Ramon in San Ramon Canton, Angeles District.			2007-07-05	D. H. Norris
Liverwort	UC2053135	110548	Lejeunea		Lejeuneaceae	On moist, shaded gravel in trail in cloud forest along Trail "E" on moderate slopes of the watershed of the Quebrada Verde in the Cordillera de TilarÃ¡n at Nectandra Gardens along Highway 142 about 15 km north of San Ramon in San Ramon Canton, Angeles District.			2007-07-05	D. H. Norris
Liverwort	UC2053143	110554	Lejeunea		Lejeuneaceae	On moist, shaded bark of tree in cloud forest along Trail "E" on moderate slopes of the watershed of the Quebrada Verde in the Cordillera de TilarÃ¡n at Nectandra Gardens along Highway 142 about 15 km north of San Ramon in San Ramon Canton, Angeles District.			2007-07-05	D. H. Norris
Liverwort	UC2053140	110558	Lejeunea		Lejeuneaceae	On moist, shaded bark of tree in cloud forest along Trail "E" on moderate slopes of the watershed of the Quebrada Verde in the Cordillera de TilarÃ¡n at Nectandra Gardens along Highway 142 about 15 km north of San Ramon in San Ramon Canton, Angeles District.			2007-07-05	D. H. Norris
Liverwort	UC2053157	110577	Lejeunea		Lejeuneaceae	On moist, diffusely lit rocks along trail in cloud forest along Trail "E" on moderate slopes of the watershed of the Quebrada Verde in the Cordillera de TilarÃ¡n at Nectandra Gardens along Highway 142 about 15 km north of San Ramon in San Ramon Canton, Angeles District.			2007-07-05	D. H. Norris
Liverwort	UC2054082	110841A	Lejeunea		Lejeuneaceae	On moist, diffusely lit bark of large Cupania along boundary of the Nectandra Reserve at top of Trail "A" in cloud forest			2009-03-26	D. H. Norris
Liverwort	UC2053138	110888	Lejeunea		Lejeuneaceae	On bark of tree in windfall opening in Nectandra Reserve.			2009-03-26	D. H. Norris
Liverwort	UC2053125	110892	Lejeunea		Lejeuneaceae	On leaves of Rubiaceae in Nectandra Reserve.			2009-03-26	D. H. Norris
Liverwort	UC2053263	110903	Lejeunea		Lejeuneaceae	On leaf of Rubiaceae in Nectandra Reserve.			2009-03-26	D. H. Norris
Liverwort	UC2053145	110905	Lejeunea		Lejeuneaceae	On leaf in Nectandra Reserve.			2009-03-26	D. H. Norris
Liverwort	UC2053259	110918	Lejeunea		Lejeuneaceae	On leaf of Melastomaceae along creek at bridge in Nectandra Reserve.			2009-03-26	D. H. Norris
Liverwort	UC2053134	110920	Lejeunea		Lejeuneaceae	Along creek at bridge in Nectandra Reserve.			2009-03-26	D. H. Norris
Liverwort	UC2053608	110937	Lejeunea		Lejeuneaceae	On leaf in open area beyond rope bridge in Nectandra Reserve.			2009-03-26	D. H. Norris
Liverwort	UC2053129	111010	Lejeunea		Lejeuneaceae	On very moist, diffusely lit branches of shrub along fog-prone ridge in the Ocotea portion of the Nectandra Gardens in area of cloud forest.			23 April- 7 May 2009	D. H. Norris
Liverwort	UC2053128	111011	Lejeunea		Lejeuneaceae	On log in the Ocotea portion of the Nectandra Gardens in area of cloud forest.			23 April- 7 May 2009	D. H. Norris
Liverwort	UC2054019	111015	Lejeunea		Lejeuneaceae	On shaded bark of small tree in the Ocotea portion of the Nectandra Gardens in area of cloud forest.			23 April- 7 May 2009	D. H. Norris
Liverwort	UC2053903	111031	Lejeunea		Lejeuneaceae	In the Nectandra Gardens in area of cloud forest.			23 April- 7 May 2009	D. H. Norris
Liverwort	UC2053606	111035	Lejeunea		Lejeuneaceae	On branches of shrub in the Nectandra Gardens in area of cloud forest.			23 April- 7 May 2009	D. H. Norris
Liverwort	UC2053142	111066	Lejeunea		Lejeuneaceae	On leaf in the Nectandra Gardens in area of cloud forest			2009-04-23	D. H. Norris
Liverwort	UC2053148	111077	Lejeunea		Lejeuneaceae	On bark of tree in the Nectandra Gardens in area of cloud forest			2009-04-23	D. H. Norris
Liverwort	UC2053851	111087E	Lejeunea		Lejeuneaceae	On bark on tree in the Nectandra Gardens in area of cloud forest			2009-04-23	D. H. Norris
Liverwort	UC2053575	111197	Lejeunea		Lejeuneaceae	On bark of tree in area of cloud forest.			2010-03-11	D. H. Norris
Liverwort	UC2053568	1110172	Lejeunea		Lejeuneaceae	On trunk of tree in the Nectandra Gardens in area of cloud forest.			23 April- 7 May 2009	D. H. Norris
Liverwort	UC2053722	17132	Lejeunea		Lejeuneaceae	On trunk of tree in cloud forest.			2010-03-11	Allen Risk
Liverwort	UC2053738	17164	Lejeunea		Lejeuneaceae	On leaves in cloud forest.			2010-03-11	Allen Risk
Liverwort	UC2053750	17177	Lejeunea		Lejeuneaceae	On trunk of tree at edge of cloud forest abutting on Dracaena plantation.			2010-03-11	Allen Risk
Liverwort	UC2053802	52	Lejeunea		Lejeuneaceae	On leaf near headquarters of the Nectandra Gardens.			2010-03-11	Freddy Castillo
Liverwort	UC2053804	53	Lejeunea		Lejeuneaceae	On bark of tree in creek near headquarters of the Nectandra Gardens.			2010-03-11	Freddy Castillo
Liverwort	UC2053817	6	Lejeunea		Lejeuneaceae	In the Nectandra Gardens in cloud forest.			2010-03-11	D. Lucas
Liverwort	UC2053909	13	Lejeunea		Lejeuneaceae	On tree in the Nectandra Gardens in cloud forest.			2010-03-11	D. Lucas
Liverwort	UC2053892	34	Lejeunea		Lejeuneaceae	On tree near laboratory in the Nectandra Gardens in cloud forest.			2010-03-11	D. Lucas
Liverwort	UC2053893	35	Lejeunea		Lejeuneaceae	On leaf along trail in the Nectandra Gardens in cloud forest.			2010-03-11	D. Lucas
Liverwort	UC2053910	39	Lejeunea		Lejeuneaceae	On tree near laboratory in the Nectandra Gardens in cloud forest.			2010-03-11	D. Lucas
Liverwort		110006H	undetermined		Lejeuneaceae	On moist, diffusely lit leaves of tree along Trail "A" in cloud forest on moderate slopes of the watershed of the Quebrada Verde in the Cordillera de TilarÃ¡n along Highway 142 about 15 km north of San Ramon in San Ramon Canton, Angeles District.			2007-07-05	D. H. Norris
Liverwort	UC2053126	110259	undetermined		Lejeuneaceae	On moist, diffusely lit branches of small tree at crest of Trail "A" in cloud forest border adjacent to pastured lands on moderate slopes of the watershed of the Quebrada Verde in the Cordillera de TilarÃ¡n along Highway 142 about 15 km north of San Ramon in San Ramon Canton, Angeles District.			2007-07-05	D. H. Norris
Liverwort	UC2053706	110059	undetermined		Lejeuneaceae	On moist, sunny twigs of shrub along Trail "E" in cloud forest on moderate slopes of the watershed of the Quebrada Verde in the Cordillera de TilarÃ¡n along Highway 142 about 15 km north of San Ramon in San Ramon Canton, Angeles District.			2007-07-05	D. H. Norris
Liverwort	UC2053674	110505	Lejeunea		Lejeuneaceae	On very moist, rather shaded rock wall in cloud forest on moderate slopes of the watershed of the Quebrada Verde in the Cordillera de TilarÃ¡n near headquarters of Nectandra Gardens along Highway 142 about 15 km north of San Ramon in San Ramon Canton, Angeles District.			2007-07-05	D. H. Norris
Liverwort	UC2053158	110516	Lejeunea		Lejeuneaceae	On very moist, rather shaded rock wall in cloud forest on moderate slopes of the watershed of the Quebrada Verde in the Cordillera de TilarÃ¡n near headquarters of Nectandra Gardens along Highway 142 about 15 km north of San Ramon in San Ramon Canton, Angeles District.			2007-07-05	D. H. Norris
Liverwort	UC2053299	110247	Lepidolejeunea		Lejeuneaceae	On very moist, shaded branch of shrub at crest of Trail "A" in cloud forest border adjacent to pastured lands on moderate slopes of the watershed of the Quebrada Verde in the Cordillera de TilarÃ¡n along Highway 142 about 15 km north of San Ramon in San Ramon Canton, Angeles District.			2007-07-05	D. H. Norris
Liverwort	UC2053293	110325	Lepidolejeunea		Lejeuneaceae	On moist, diffusely lit leaf of palm along Trail "E" in cloud forest on moderate slopes of the watershed of the Quebrada Verde in the Cordillera de TilarÃ¡n along Highway 142 about 15 km north of San Ramon in San Ramon Canton, Angeles District.			2007-07-05	D. H. Norris
Liverwort	UC2053300	110493	Lepidolejeunea		Lejeuneaceae	On moist, shaded bark of tree at edge of cloud forest on moderate slopes of the watershed of the Quebrada Verde in the Cordillera de TilarÃ¡n at entrance to Nectandra Gardens along Highway 142 about 15 km north of San Ramon in San Ramon Canton, Angeles District.			2007-07-05	D. H. Norris
Liverwort	UC2053298	110820	Lepidolejeunea		Lejeuneaceae	On rocks in river valley at entrance to the Nectandra Reserve in cloud forest			2009-03-26	D. H. Norris
Liverwort	UC2053836	111051B	Lepidolejeunea		Lejeuneaceae	On trunk of tree fern in Ocotea potion of the Nectandra Gardensin area of cloud forest			1900-01-04	D. H. Norris
Liverwort	UC2053297	110185	Lepidolejeunea	involuta	Lejeuneaceae	On moist, sunny limbs of shrub at crest of Trail "A" in cloud forest border adjacent to pastured lands on moderate slopes of the watershed of the Quebrada Verde in the Cordillera de TilarÃ¡n along Highway 142 about 15 km north of San Ramon in San Ramon Canton, Angeles District.			23 April- 7 May 2009	D. H. Norris
Liverwort	UC2053816	20	Lepidolejeunea	spongia	Lejeuneaceae	On rock wall in the Nectandra Gardens in cloud forest.			2010-03-11	D. Lucas
Liverwort		109990 L	Leptolejeune		Lejeuneaceae	On moist and shaded large tree along Trail "A" in cloud forest on moderate slopes of the watershed of the Quebrada Verde in the Cordillera de TilarÃ¡n along Highway 142 about 15 km north of San Ramon in San Ramon Canton, Angeles District.			2007-07-05	D. H. Norris
Liverwort	UC2054202	110002I	Leptolejeunea		Lejeuneaceae	On leaves of shrub along Trail "A" in cloud forest.			2007-07-05	D. H. Norris
Liverwort	UC2054203	110002J	Leptolejeunea		Lejeuneaceae	On leaves of shrub along Trail "A" in cloud forest.			2007-07-05	D. H. Norris
Liverwort	UC2054077	110385A	Leptolejeunea		Lejeuneaceae	On moist, shaded leaf of palm along Trail "C" in cloud forest			2007-07-05	D. H. Norris
Liverwort	UC2053881	110842A	Leptolejeunea		Lejeuneaceae	On leaf Rubiaceae along boundary of the Nectandra Reserveat top of Trail "A" in cloud forest			2009-03-26	D. H. Norris
Liverwort	UC2054027	110853O	Leptolejeunea		Lejeuneaceae	On leaf at base of trail "A" in the Nectandra Reserve in cloud forest			2009-03-26	D. H. Norris
Liverwort	UC2053848	110930C	Leptolejeunea		Lejeuneaceae	On leaf along creek at bridge in Necandra Reserve			2009-03-26	D. H. Norris
Liverwort	UC2054075	110938D	Leptolejeunea		Lejeuneaceae	On leaf in open area boyond rope bridge in Nectandra Reserve			2009-03-26	D. H. Norris
Liverwort	UC2053205	111247	Leptolejeunea		Lejeuneaceae	On bark of small tree along Trail "A" of Nectandra Gardens in area of cloud forest			2010-03-11	D. H. Norris
Liverwort	UC2053932	6	Leucolejeunea		Lejeuneaceae	On tree in area of cloud forest.			2010-03-11	P. Nonkulolu
Liverwort	UC2053837	110344B	Luteolejeunea		Lejeuneaceae	On moist, shaded leaf of fern along Trail "E" in cloud forest			2007-07-05	D. H. Norris
Liverwort	UC2053296	110141	Macrolejeunea		Lejeuneaceae	On moist, shaded branches of shrub along Trail "E" in cloud forest on moderate slopes of the watershed of the Quebrada Verde			2007-07-05	D. H. Norris
Liverwort	UC2053294	110308	Macrolejeunea		Lejeuneaceae	On moist, shaded rock along Trail "E" in cloud forest on moderate slopes of the watershed of the Quebrada Verde in the Cordillera de TilarÃ¡n along Highway 142 about 15 km north of San Ramon in San Ramon Canton, Angeles District.			2007-07-05	D. H. Norris
Liverwort	UC2053745	17171	Macrolejeunea		Lejeuneaceae	On trunk of tree at edge of cloud forest abutting on Dracaena plantation.			2010-03-11	Allen Risk
Liverwort	UC2053792	5714	Macrolejeunea		Lejeuneaceae	On stone wall near conference center along trail in Nectandra Gardens.			2010-03-14	Dorothy Allard
Liverwort		110441	Macrolejeunia		Lejeuneaceae	On very moist, diffusely lit rock wall at edge of cloud forest on moderate slopes of the watershed of the Quebrada Verde in the Cordillera de TilarÃ¡n at entrance to Nectandra Gardens along Highway 142 about 15 km north of San Ramon in San Ramon Canton, Angeles District.			2007-07-05	D. H. Norris
Liverwort		110292A	Mastigolejeunea		Lejeuneaceae	On moist, diffusely lit fencepost in small creek at crest of Trail "A" in cloud forest border adjacent to pastured lands on moderate slopes of the watershed of the Quebrada Verde in the Cordillera de TilarÃ¡n along Highway 142 about 15 km north of San Ramon in San Ramon Canton, Angeles District.			2007-07-05	D. H. Norris
Liverwort	UC2053783	110044A	Microlejeunea		Lejeuneaceae	On moist, sunny limb of tree at crest of Trail "A" in cloud forest border adjacent to pastured lands on moderate slopes of the watershed of the Quebrada Verde in the Cordillera de TilarÃ¡n along Highway 142 about 15 km north of San Ramon in San Ramon Canton, Angeles District.			2007-07-05	D. H. Norris
Liverwort		110057H	Microlejeunea		Lejeuneaceae	On leaves of shrub in cloud forest near headquarters of Nectandra Garden on moderate slopes of the watershed of the Quebrada Verde in the Cordillera de TilarÃ¡n along Highway 142 about 15 km north of San Ramon in San Ramon Canton, Angeles District.			2007-07-05	D. H. Norris
Liverwort	UC2053221	109988	Microlejeunea		Lejeuneaceae	On moist and shaded small shrub along Trail "A" in cloud forest on moderate slopes of the watershed of the Quebrada Verde in the Cordillera de TilarÃ¡n along Highway 142 about 15 km north of San Ramon in San Ramon Canton, Angeles District.			2007-07-05	D. H. Norris
Liverwort	UC2053838	110344D	Microlejeunea		Lejeuneaceae	On moist, shaded leaf of fern along Trail "E" in cloud forest			2007-07-05	D. H. Norris
Liverwort	UC2054164	110570B	Microlejeunea		Lejeuneaceae	On moist, shaded leaf of shrub in cloud forest.			2007-07-05	D. H. Norris
Liverwort	UC2053839	110938E	Microlejeunea		Lejeuneaceae	On leaf in open area beyond bridge in Nectandra Reserve			2007-07-05	D. H. Norris
Liverwort	UC2054199	110002G	Odontolejeunea		Lejeuneaceae	On leaves of shrub along Trail "A" in cloud forest.			2007-07-05	D. H. Norris
Liverwort	UC2053552	110042	Odontolejeunea		Lejeuneaceae	On moist, rather sunny small tree at crest of Trail "A" in cloud forest border adjacent to pastured lands on moderate slopes of the watershed of the Quebrada Verde in the Cordillera de TilarÃ¡n along Highway 142 about 15 km north of San Ramon in San Ramon Canton, Angeles District.			2007-07-05	D. H. Norris
Liverwort		110057E	Odontolejeunea		Lejeuneaceae	On leaves of shrub in cloud forest near headquarters of Nectandra Garden on moderate slopes of the watershed of the Quebrada Verde in the Cordillera de TilarÃ¡n along Highway 142 about 15 km north of San Ramon in San Ramon Canton, Angeles District.			2007-07-05	D. H. Norris
Liverwort		110065B	Odontolejeunea		Lejeuneaceae	On very moist, diffusely lit leaf of palm along Trail "E" in cloud forest on moderate slopes of the watershed of the Quebrada Verde in the Cordillera de TilarÃ¡n along Highway 142 about 15 km north of San Ramon in San Ramon Canton, Angeles District.			2007-07-05	D. H. Norris
Liverwort		110114 B	Odontolejeunea		Lejeuneaceae	On moist, shaded leaves of shrub along Trail "E" in cloud forest on moderate slopes of the watershed of the Quebrada Verde in the Cordillera de TilarÃ¡n along Highway 142 about 15 km north of San Ramon in San Ramon Canton, Angeles District.			2007-07-05	D. H. Norris
Liverwort		110542B	Odontolejeunea		Lejeuneaceae	On moist, shaded boulder along trail in cloud forest along Trail "E" on moderate slopes of the watershed of the Quebrada Verde in the Cordillera de TilarÃ¡n at Nectandra Gardens along Highway 142 about 15 km north of San Ramon in San Ramon Canton, Angeles District.			2007-07-05	D. H. Norris
Liverwort		110057G	Odontolejeunea		Lejeuneaceae	On branches of shrub in cloud forest near head quarters of Nectandra Garden			2007-07-05	D. H. Norris
Liverwort	UC2054055	110344F	Odontolejeunea		Lejeuneaceae	On moist, shaded leaf of fern along Trail "E" in cloud forest			2007-07-05	D. H. Norris
Liverwort	UC2054053	111016B	Odontolejeunea		Lejeuneaceae	On leaf in the Ocotea portion of the Nectandra gardens in area of cloud forest			2007-07-05	D. H. Norris
Liverwort	UC2054054	110378C	Odontolejeunea	decemdentata	Lejeuneaceae	On moist, shaded leaf of palm along Trail "C" in cloud forest			2007-07-05	D. H. Norris
Liverwort	UC2053776	17213	Odontolejeunea	decemdentata	Lejeuneaceae	Ephiphylloua on old fern on tree near stream at edge of multi-layered tropical cloud forest abutting on Dracaena plantation.			2010-03-11	Allen Risk
Liverwort	UC2053291	110485	Omphalanthus		Lejeuneaceae	On moist, diffusely lit bark of tree at edge of cloud forest on moderate slopes of the watershed of the Quebrada Verde in the Cordillera de TilarÃ¡n at entrance to Nectandra Gardens along Highway 142 about 15 km north of San Ramon in San Ramon Canton, Angeles District.			2007-07-05	D. H. Norris
Liverwort	UC2053292	110486	Omphalanthus	filiformis	Lejeuneaceae	On moist, sunny fencepost at crest of Trail "A" in cloud forest border adjacent to pastured lands on moderate slopes of the watershed of the Quebrada Verde			2007-07-05	D. H. Norris
Liverwort	UC2053840	111019Y	Pedinolejeunea		Lejeuneaceae	On leaf on shrub in the Nectandra gardens in area of cloud forest			2007-07-05	D. H. Norris
Liverwort	UC2054076	110385B	Pictolejeunea		Lejeuneaceae	On moist, shaded leaf of palm along Trail "C" in cloud forest			2007-07-05	D. H. Norris
Liverwort		109990 M	Prionolejeune		Lejeuneaceae	On moist and shaded large tree along Trail "A" in cloud forest on moderate slopes of the watershed of the Quebrada Verde in the Cordillera de TilarÃ¡n along Highway 142 about 15 km north of San Ramon in San Ramon Canton, Angeles District.			2007-07-05	D. H. Norris
Liverwort	UC2054204	110002K	Prionolejeunea		Lejeuneaceae	On leaves of shrub along Trail "A" in cloud forest.			2007-07-05	D. H. Norris
Liverwort	UC2053841	110160 B	Prionolejeunea		Lejeuneaceae	On moist, shaded leaves of shrub along Trail "E" in cloud forest			2007-07-05	D. H. Norris
Liverwort		110563	Prionolejeunea		Lejeuneaceae	On moist, shaded stembark of tree in cloud forest along Trail "E" on moderate slopes of the watershed of the Quebrada Verde in the Cordillera de TilarÃ¡n at Nectandra Gardens along Highway 142 about 15 km north of San Ramon in San Ramon Canton, Angeles District.			2007-07-05	D. H. Norris
Liverwort	UC2053781	110578	Prionolejeunea		Lejeuneaceae	On moist, rather shaded bark of small tree in cloud forest along Trail "E" on moderate slopes of the watershed of the Quebrada Verde in the Cordillera de TilarÃ¡n at Nectandra Gardens along Highway 142 about 15 km north of San Ramon in San Ramon Canton, Angeles District.			2007-07-05	D. H. Norris
Liverwort	UC2053290	110264	Prionolejeunea		Lejeuneaceae	On very moist, shaded sapling at crest of Trail "A" in cloud forest border adjacent to pastured lands on moderate slopes of the watershed of the Quebrada Verde in the Cordillera de TilarÃ¡n along Highway 142 about 15 km north of San Ramon in San Ramon Canton, Angeles District.			2007-07-05	D. H. Norris
Liverwort	UC2053900	109995	Prionolejeunea	denticulata	Lejeuneaceae	On moist and shaded leaves of shrub along Trail "A" in cloud forest on moderate slopes of the watershed of the Quebrada Verde in the Cordillera de TilarÃ¡n along Highway 142 about 15 km north of San Ramon in San Ramon Canton, Angeles District.			2007-07-05	D. H. Norris
Liverwort		110046	unknown Ptychantoideae		Lejeuneaceae	On moist, sunny twigs of shrub at crest of Trail "A" in cloud forest border adjacent to pastured lands on moderate slopes of the watershed of the Quebrada Verde in the Cordillera de TilarÃ¡n along Highway 142 about 15 km north of San Ramon in San Ramon Canton, Angeles District.			2007-07-05	D. H. Norris
Liverwort		110227	unknown Ptychantoideae		Lejeuneaceae	On moist, sunny fencepost at crest of Trail "A" in cloud forest border adjacent to pastured lands on moderate slopes of the watershed of the Quebrada Verde			2007-07-05	D. H. Norris
Liverwort		110335C	unknown Ptychantoideae		Lejeuneaceae	On moist, shaded leaf of palm along Trail "E" in cloud forest on moderate slopes of the watershed of the Quebrada Verde in the Cordillera de TilarÃ¡n along Highway 142 about 15 km north of San Ramon in San Ramon Canton, Angeles District.			2007-07-05	D. H. Norris
Liverwort	UC2053287	110252	Ptychanthus		Lejeuneaceae	On moist, diffusely lit branches of small tree at crest of Trail "A" in cloud forest border adjacent to pastured lands on moderate slopes of the watershed of the Quebrada Verde in the Cordillera de TilarÃ¡n along Highway 142 about 15 km north of San Ramon in San Ramon Canton, Angeles District.			2007-07-05	D. H. Norris
Liverwort	UC2053289	110253	Ptychanthus		Lejeuneaceae	On moist, diffusely lit branches of small tree at crest of Trail "A" in cloud forest border adjacent to pastured lands on moderate slopes of the watershed of the Quebrada Verde in the Cordillera de TilarÃ¡n along Highway 142 about 15 km north of San Ramon in San Ramon Canton, Angeles District.			2007-07-05	D. H. Norris
Liverwort	UC2053288	110265	Ptychanthus		Lejeuneaceae	On moist, sunny fencepost at crest of Trail "A" in cloud forest border adjacent to pastured lands on moderate slopes of the watershed of the Quebrada Verde in the Cordillera de TilarÃ¡n along Highway 142 about 15 km north of San Ramon in San Ramon Canton, Angeles District.			2007-07-05	D. H. Norris
Liverwort	UC2054167	110570E	Pycnolejeunea		Lejeuneaceae	On moist, shaded leaf of shrub in cloud forest.			2007-07-05	D. H. Norris
Liverwort	UC2053842	110930A	Pycnolejeunea		Lejeuneaceae	On leaf along creek at bridge in Nectandra Reserve			2009-03-26	D. H. Norris
Liverwort	UC2053564	110590	Rectolejeunea		Lejeuneaceae	On moist, diffusely lit twigs of shrub in cloud forest along Trail "E" on moderate slopes of the watershed of the Quebrada Verde in the Cordillera de TilarÃ¡n at Nectandra Gardens along Highway 142 about 15 km north of San Ramon in San Ramon Canton, Angeles District.			2007-07-05	D. H. Norris
Liverwort	UC2053877	110147B	Stictolejeunea		Lejeuneaceae	On moist, shaded log along Trail "E" in cloud forest			2007-07-05	D. H. Norris
Liverwort	UC2053843	110862D	Stictolejeunea		Lejeuneaceae	Pendant from small shrub with cordate leaves in canyon near entrance to the Nectandra reserve where the small stram crosses the highway in cloud forest			2009-03-26	D. H. Norris
Liverwort	UC2053286	111202	Stictolejeunea		Lejeuneaceae	On moist, diffusely lit base of tree in area of cloud forest			2010-03-11	D. H. Norris
Liverwort		110044C	Taxilejeunea		Lejeuneaceae	On moist, sunny limb of tree at crest of Trail "A" in cloud forest border adjacent to pastured lands on moderate slopes of the watershed of the Quebrada Verde in the Cordillera de TilarÃ¡n along Highway 142 about 15 km north of San Ramon in San Ramon Canton, Angeles District.			2007-07-05	D. H. Norris
Liverwort		110049	Taxilejeunea		Lejeuneaceae	On moist, sunny twigs of shrub at crest of Trail "A" in cloud forest border adjacent to pastured lands on moderate slopes of the watershed of the Quebrada Verde in the Cordillera de TilarÃ¡n along Highway 142 about 15 km north of San Ramon in San Ramon Canton, Angeles District.			2007-07-05	D. H. Norris
Liverwort		110065F	Taxilejeunea		Lejeuneaceae	On very moist, diffusely lit leaf of palm along Trail "E" in cloud forest on moderate slopes of the watershed of the Quebrada Verde in the Cordillera de TilarÃ¡n along Highway 142 about 15 km north of San Ramon in San Ramon Canton, Angeles District.			2007-07-05	D. H. Norris
Liverwort		110549	Taxilejeunea		Lejeuneaceae	On moist, shaded boulder along trail in cloud forest along Trail "E" on moderate slopes of the watershed of the Quebrada Verde in the Cordillera de TilarÃ¡n at Nectandra Gardens along Highway 142 about 15 km north of San Ramon in San Ramon Canton, Angeles District.			2007-07-05	D. H. Norris
Liverwort	UC2053875	110159A	Taxilejeunea		Lejeuneaceae	On moist, shaded horizontal limb of shrub along Trail "E" in cloud forest			2007-07-05	D. H. Norris
Liverwort	UC2053212	110165	Taxilejeunea		Lejeuneaceae	On very moist, shaded dripping rock wall along Trail "E" in cloud forest on moderate slopes of the watershed of the Quebrada Verde			2007-07-05	D. H. Norris
Liverwort	UC2053209	110320	Taxilejeunea		Lejeuneaceae	On moist, shaded boulder along Trail "E" in cloud forest on moderate slopes of the watershed of the Quebrada Verde in the Cordillera de TilarÃ¡n along Highway 142 about 15 km north of San Ramon in San Ramon Canton, Angeles District.			2007-07-05	D. H. Norris
Liverwort	UC2053554	110331	Taxilejeunea		Lejeuneaceae	On moist, shaded stones along Trail "E" in cloud forest on moderate slopes of the watershed of the Quebrada Verde in the Cordillera de TilarÃ¡n along Highway 142 about 15 km north of San Ramon in San Ramon Canton, Angeles District.			2007-07-05	D. H. Norris
Liverwort	UC2053553	110539	Taxilejeunea		Lejeuneaceae	On moist, shaded rocks along trail in cloud forest along Trail "E" on moderate slopes of the watershed of the Quebrada Verde in the Cordillera de TilarÃ¡n at Nectandra Gardens along Highway 142 about 15 km north of San Ramon in San Ramon Canton, Angeles District.			2007-07-05	D. H. Norris
Liverwort	UC2053211	110547	Taxilejeunea		Lejeuneaceae	On moist, shaded gravel in trail in cloud forest along Trail "E" on moderate slopes of the watershed of the Quebrada Verde in the Cordillera de TilarÃ¡n at Nectandra Gardens along Highway 142 about 15 km north of San Ramon in San Ramon Canton, Angeles District.			2007-07-05	D. H. Norris
Liverwort	UC2053534	111061	Taxilejeunea		Lejeuneaceae	On twigs in the Nectandra Gardens in area of cloud forest.			23 April- 7 May 2009	D. H. Norris
Liverwort	UC2053810	60	Taxilejeunea		Lejeuneaceae	On bark of tree in creek near headquarters of the Nectandra Gardens.			2010-03-11	Freddy Castillo
Liverwort	UC2053923	41	Taxilejeunea		Lejeuneaceae	On rock in the Nectandra Gardens in cloud forest.			2010-03-11	D. Lucas
Liverwort	UC2053506	110525	Taxilejeunea	sulphurea	Lejeuneaceae	On moist, diffusely lit branch fallen from canopy in cloud forest on moderate slopes of the watershed of the Quebrada Verde in the Cordillera de TilarÃ¡n near headquarters of Nectandra Gardens along Highway 142 about 15 km north of San Ramon in San Ramon Canton, Angeles District.			2007-07-05	D. H. Norris
Liverwort	UC2053733	17153	Taxilejeunea	sulphurea	Lejeuneaceae	On cobble by trail in cloud forest.			2010-03-11	Allen Risk
Liverwort	UC2053766	17195	Taxilejeunea	sulphurea	Lejeuneaceae	On twig overarching stream at edge of multi-layered tropical cloud forest abutting on Dracaena plantation.			2010-03-11	Allen Risk
Liverwort	UC2054026	110402L	Trachylejeunea		Lejeuneaceae	On moist, shaded leaves of shrub along Trail "C" in cloud forest			2007-07-05	D. H. Norris
Liverwort	UC2054018	37	Trachylejeunea		Lejeuneaceae	In area of cloud forest.			2010-03-11	P. Nonkulolu
Liverwort		110140	Lepicolea		Lepicoleaceae	On branches fallen from canopy along Trail "E" in cloud forest on moderate slopes of the watershed of the Quebrada Verde in the Cordillera de TilarÃ¡n along Highway 142 about 15 km north of San Ramon in San Ramon Canton, Angeles District.			2007-07-05	D. H. Norris
Liverwort	UC2053689	110350	Lepicolea		Lepicoleaceae	On moist, shaded bark of small tree along Trail "E" in cloud forest on moderate slopes of the watershed of the Quebrada Verde in the Cordillera de TilarÃ¡n along Highway 142 about 15 km north of San Ramon in San Ramon Canton, Angeles District.			2007-07-05	D. H. Norris
Liverwort	UC2053351	110407	Lepicolea	ochroleuca	Lepicoleaceae	On moist, shaded bark of small tree along Trail "C" in cloud forest on moderate slopes of the watershed of the Quebrada Verde in the Cordillera de TilarÃ¡n along Highway 142 about 15 km north of San Ramon in San Ramon Canton, Angeles District.			2007-07-05	D. H. Norris
Liverwort	UC2053353	110433	Lepicolea	ochroleuca	Lepicoleaceae	On moist, shaded large tree along Trail "C" in cloud forest on moderate slopes of the watershed of the Quebrada Verde in the Cordillera de TilarÃ¡n along Highway 142 about 15 km north of San Ramon in San Ramon Canton, Angeles District.			2007-07-05	D. H. Norris
Liverwort	UC2053698	110039	Bazzania	breuteliana	Lepidoziaceae	On moist, rather sunny small tree at crest of Trail "A" in cloud forest border adjacent to pastured lands on moderate slopes of the watershed of the Quebrada Verde in the Cordillera de TilarÃ¡n along Highway 142 about 15 km north of San Ramon in San Ramon Canton, Angeles District.			2007-07-05	D. H. Norris
Liverwort	UC2053210	110534	Bazzania	breuteliana	Lepidoziaceae	On moist, shaded boulder along trail in cloud forest along Trail "E" on moderate slopes of the watershed of the Quebrada Verde in the Cordillera de TilarÃ¡n at Nectandra Gardens along Highway 142 about 15 km north of San Ramon in San Ramon Canton, Angeles District.			2007-07-05	D. H. Norris
Liverwort	UC2053692	109947	Bazzania	breuteliana	Lepidoziaceae	On trunk of tree fern in cloud forest along road near entrance gate to Nectandra Garden on moderate slopes of the watershed of the Quebrada Verde			2007-07-05	D. H. Norris
Liverwort	UC2053697	109994	Bazzania	breuteliana	Lepidoziaceae	On moist and shaded twig of shrub along Trail "A" in cloud forest on moderate slopes of the watershed of the Quebrada Verde in the Cordillera de TilarÃ¡n along Highway 142 about 15 km north of San Ramon in San Ramon Canton, Angeles District.			2007-07-05	D. H. Norris
Liverwort	UC2053694	110098	Bazzania	breuteliana	Lepidoziaceae	On moist, diffusely lit top of large rock in stream along Trail "E" in cloud forest on moderate slopes of the watershed of the Quebrada Verde in the Cordillera de TilarÃ¡n along Highway 142 about 15 km north of San Ramon in San Ramon Canton, Angeles District.			2007-07-05	D. H. Norris
Liverwort		110163 A	Bazzania	breuteliana	Lepidoziaceae	On moist, shaded bark of small tree along Trail "E" in cloud forest on moderate slopes of the watershed of the Quebrada Verde in the Cordillera de TilarÃ¡n along Highway 142 about 15 km north of San Ramon in San Ramon Canton, Angeles District.			2007-07-05	D. H. Norris
Liverwort		110395A	Bazzania	breuteliana	Lepidoziaceae	On moist, shaded twigs of recently fallen tree along intermittent stream along Trail "C" in cloud forest on moderate slopes of the watershed of the Quebrada Verde in the Cordillera de TilarÃ¡n along Highway 142 about 15 km north of San Ramon in San Ramon Canton, Angeles District.			2007-07-05	D. H. Norris
Liverwort	UC2053320	110571	Bazzania	breuteliana	Lepidoziaceae	On moist, shaded rock along trail in cloud forest along Trail "E" on moderate slopes of the watershed of the Quebrada Verde in the Cordillera de TilarÃ¡n at Nectandra Gardens along Highway 142 about 15 km north of San Ramon in San Ramon Canton, Angeles District.			2007-07-05	D. H. Norris
Liverwort	UC2053695	109950	Bazzania	fendleri	Lepidoziaceae	On trunk of tree fern in cloud forest along road near entrance gate to Nectandra Garden on moderate slopes of the watershed of the Quebrada Verde			2007-07-05	D. H. Norris
Liverwort	UC2053696	109992	Bazzania	fendleri	Lepidoziaceae	On branches of tree fallen from high in canopy along Trail "A" in cloud forest on moderate slopes of the watershed of the Quebrada Verde in the Cordillera de TilarÃ¡n along Highway 142 about 15 km north of San Ramon in San Ramon Canton, Angeles District.			2007-07-05	D. H. Norris
Liverwort	UC2053314	110575	Bazzania	fendleri	Lepidoziaceae	On moist, shaded bark of tree in cloud forest along Trail "E" on moderate slopes of the watershed of the Quebrada Verde in the Cordillera de TilarÃ¡n at Nectandra Gardens along Highway 142 about 15 km north of San Ramon in San Ramon Canton, Angeles District.			2007-07-05	D. H. Norris
Liverwort	UC2054025	110161B	Bazzania	gracilis	Lepidoziaceae	On moist, shaded leaves of shrub along Trail "E" in cloud forest			2007-07-05	D. H. Norris
Liverwort	UC2053315	110306	Bazzania	gracilis	Lepidoziaceae	On moist, shaded bark of large tree along Trail "E" in cloud forest on moderate slopes of the watershed of the Quebrada Verde in the Cordillera de TilarÃ¡n along Highway 142 about 15 km north of San Ramon in San Ramon Canton, Angeles District.			2007-07-05	D. H. Norris
Liverwort	UC2053551	109989	Bazzania		Lepidoziaceae	On moist and shaded large tree along Trail "A" in cloud forest on moderate slopes of the watershed of the Quebrada Verde in the Cordillera de TilarÃ¡n along Highway 142 about 15 km north of San Ramon in San Ramon Canton, Angeles District.			2007-07-05	D. H. Norris
Liverwort	UC2053316	110286	Bazzania		Lepidoziaceae	On moist, diffusely lit rock in small creek at crest of Trail "A" in cloud forest border adjacent to pastured lands on moderate slopes of the watershed of the Quebrada Verde in the Cordillera de TilarÃ¡n along Highway 142 about 15 km north of San Ramon in San Ramon Canton, Angeles District.			2007-07-05	D. H. Norris
Liverwort	UC2053312	110562	Bazzania		Lepidoziaceae	On moist, shaded stem of small shrub in cloud forest along Trail "E" on moderate slopes of the watershed of the Quebrada Verde in the Cordillera de TilarÃ¡n at Nectandra Gardens along Highway 142 about 15 km north of San Ramon in San Ramon Canton, Angeles District.			2007-07-05	D. H. Norris
Liverwort	UC2053693	110591	Bazzania		Lepidoziaceae	On moist, diffusely lit twigs of shrub in cloud forest along Trail "E" on moderate slopes of the watershed of the Quebrada Verde in the Cordillera de TilarÃ¡n at Nectandra Gardens along Highway 142 about 15 km north of San Ramon in San Ramon Canton, Angeles District.			2007-07-05	D. H. Norris
Liverwort	UC2054080	110841B	Bazzania		Lepidoziaceae	On moist, diffusely lit bark of large /Cupania/ along boundary of the nectandra Reserve at top of Trail "A" in cloud forest			2009-03-26	D. H. Norris
Liverwort	UC2053324	110878	Bazzania		Lepidoziaceae	Log newly fallen from canopy in Nectandra Reserve.			2009-03-26	D. H. Norris
Liverwort	UC2053313	110880	Bazzania		Lepidoziaceae	Log newly fallen from canopy in Nectandra Reserve.			2009-03-26	D. H. Norris
Liverwort	UC2053323	110886	Bazzania		Lepidoziaceae	On horizontal trunk of small tree in Nectandra Reserve.			2009-03-26	D. H. Norris
Liverwort	UC2054022	110901A	Bazzania		Lepidoziaceae	Pendent from small sapling in Nectandra Reserve			2009-03-26	D. H. Norris
Liverwort	UC2053317	111048	Bazzania		Lepidoziaceae	On bark of large tree in the Nectandra Gardens in ara of cloud forest			2009-04-23	D. H. Norris
Liverwort	UC2053319	111071	Bazzania		Lepidoziaceae	On trunk of tree in the Nectandra Gardens in area of cloud forest			2009-04-23	D. H. Norris
Liverwort	UC2054024	111087G	Bazzania		Lepidoziaceae	On bark of tree in the Nectandra Gardens in area of cloud forest			2009-04-23	D. H. Norris
Liverwort	UC2054045	111093A	Bazzania		Lepidoziaceae	On sunny fencepost at edge of Ocotea portion of Nectandra Gardens in area of cloud forest			2009-04-23	D. H. Norris
Liverwort	UC2054023	111093F	Bazzania		Lepidoziaceae	On sunny fence post at edge of Ocotea portion of Nectandra Gardens in area of cloud forest			2009-04-23	D. H. Norris
Liverwort	UC2053726	17142	Bazzania		Lepidoziaceae	Pendent from trunk of tree in cloud forest.			2010-03-11	D. H. Norris
Liverwort	UC2054009	23	Bazzania		Lepidoziaceae	On soil in area of cloud forest.			2010-03-11	D. H. Norris
Liverwort	UC2053921	3	Bazzania		Lepidoziaceae	On rock in filtered light in the Nectandra Gardens in cloud forest.			2010-03-11	D. H. Norris
Liverwort	UC2053919	14	Bazzania		Lepidoziaceae	On base of tree in the Nectandra Gardens in cloud forest.			2010-03-11	D. H. Norris
Liverwort	UC2053920	15	Bazzania		Lepidoziaceae	On bark of tree in the Nectandra Gardens in cloud forest.			2010-03-11	D. H. Norris
Liverwort	UC2053949	19	Bazzania		Lepidoziaceae	In the Nectandra Gardens in cloud forest.			2010-03-11	D. H. Norris
Liverwort	UC2053988	3	Bazzania		Lepidoziaceae	On soil in cloud forest.			2010-03-11	D. H. Norris
Liverwort	UC2053626	1	Bazzania		Lepidoziaceae	On wall along highway entrance to Nectandra Gardens along Highway 142 in cloud forest			2010-03-11	D. H. Norris
Liverwort	UC2053924	47	Bazzania	hookeri	Lepidoziaceae	On tree in the Nectandra Gardens in cloud forest.			2010-03-11	D. H. Norris
Liverwort	UC2053736	17156	Bazzania	longa	Lepidoziaceae	On trunk of small tree by trail in cloud forest.			2010-03-11	D. H. Norris
Liverwort	UC2053952	34	Bazzania	longa	Lepidoziaceae	On branch of tree in area of cloud forest.			2010-03-11	D. H. Norris
Liverwort	UC2053550	109985	Bazzania	schlimiana	Lepidoziaceae	On moist and shaded small shrub of Psychotria along Trail "A" in cloud forest on moderate slopes of the watershed of the Quebrada Verde in the Cordillera de TilarÃ¡n along Highway 142 about 15 km north of San Ramon in San Ramon Canton, Angeles District.			2007-07-05	D. H. Norris
Liverwort	UC2053889	110877	Herbertus	divergens	Lepidoziaceae	Log newly fallen from canopy in Nectandra Reserve.			2009-03-26	D. H. Norris
Liverwort	UC2053739	17165	Kurzia	flagellifera	Lepidoziaceae	On trunk of tree in cloud forest.			2010-03-11	D. H. Norris
Liverwort		110110	Lepidozia		Lepidoziaceae	Pendent from moist, shaded twigs of shrub along Trail "E" in cloud forest on moderate slopes of the watershed of the Quebrada Verde in the Cordillera de TilarÃ¡n along Highway 142 about 15 km north of San Ramon in San Ramon Canton, Angeles District.			2007-07-05	D. H. Norris
Liverwort		110551B	Lepidozia		Lepidoziaceae	On moist, shaded log along trail in cloud forest along Trail "E" on moderate slopes of the watershed of the Quebrada Verde in the Cordillera de TilarÃ¡n at Nectandra Gardens along Highway 142 about 15 km north of San Ramon in San Ramon Canton, Angeles District.			2007-07-05	D. H. Norris
Liverwort	UC2053666	110071	Lepidozia		Lepidoziaceae	On very moist, rather shaded leaf of Cyclanthes along Trail "E" in cloud forest on moderate slopes of the watershed of the Quebrada Verde in the Cordillera de TilarÃ¡n along Highway 142 about 15 km north of San Ramon in San Ramon Canton, Angeles District.			2007-07-05	D. H. Norris
Liverwort	UC2053355	110207	Lepidozia		Lepidoziaceae	On moist, shaded base of large tree at crest of Trail "A" in cloud forest border adjacent to pastured lands on moderate slopes of the watershed of the Quebrada Verde			2007-07-05	D. H. Norris
Liverwort	UC2054032	110344C	Lepidozia		Lepidoziaceae	On moist, shaded leaf of fern along trail "E" in cloud forest			2007-07-05	D. H. Norris
Liverwort	UC2053347	110387	Lepidozia		Lepidoziaceae	On moist, shaded branch fallen from canopy along Trail "C" in cloud forest on moderate slopes of the watershed of the Quebrada Verde in the Cordillera de TilarÃ¡n along Highway 142 about 15 km north of San Ramon in San Ramon Canton, Angeles District.			2007-07-05	D. H. Norris
Liverwort	UC2053354	110474	Lepidozia		Lepidoziaceae	On moist, diffusely lit bark of tree along highway at edge of cloud forest on moderate slopes of the watershed of the Quebrada Verde in the Cordillera de TilarÃ¡n at entrance to Nectandra Gardens along Highway 142 about 15 km north of San Ramon in San Ramon Canton, Angeles District.			2007-07-05	D. H. Norris
Liverwort	UC2053280	110550	Lepidozia		Lepidoziaceae	On moist, shaded twigs of shrub in cloud forest along Trail "E" on moderate slopes of the watershed of the Quebrada Verde in the Cordillera de TilarÃ¡n at Nectandra Gardens along Highway 142 about 15 km north of San Ramon in San Ramon Canton, Angeles District.			2007-07-05	D. H. Norris
Liverwort	UC2053352	110898	Lepidozia		Lepidoziaceae	In canopy of recently fallen tree in Nectandra Reserve.			2009-03-26	D. H. Norris
Liverwort	UC2053719	111038	Lepidozia		Lepidoziaceae	On bark of large tree in the Nectandra Gardens in area of cloud forest.			23 April- 7 May 2009	D. H. Norris
Liverwort	UC2053220	109986	Lepidozia	caespitosa	Lepidoziaceae	On moist and shaded small shrub of Psychotria along Trail "A" in cloud forest on moderate slopes of the watershed of the Quebrada Verde in the Cordillera de TilarÃ¡n along Highway 142 about 15 km north of San Ramon in San Ramon Canton, Angeles District.			2007-07-05	D. H. Norris
Liverwort	UC2053755	17184	Lepidozia	cupressina	Lepidoziaceae	On trunk of tree at edge of cloud forest abutting on Dracaena plantation.			2010-03-11	D. H. Norris
Liverwort	UC2053922	28	Lepidozia	squarrosa	Lepidoziaceae	On tree in the Nectandra Gardens in cloud forest.			2010-03-11	D. H. Norris
Liverwort	UC2053283	111056	Micropterygium		Lepidoziaceae	On bark of large tree in the Nectandra Gardens in area of cloud forest			2009-04-23	D. H. Norris
Liverwort	UC2053997	7	Micropterygium		Lepidoziaceae	At edge of cloud forest.			2010-03-11	D. H. Norris
Liverwort	UC2053218	109977	Micropterygium	pterygophyllum	Lepidoziaceae	On bark of Guarea along Trail "A" in cloud forest on moderate slopes of the watershed of the Quebrada Verde in the Cordillera de TilarÃ¡n along Highway 142 about 15 km north of San Ramon in San Ramon Canton, Angeles District.			2007-07-05	D. H. Norris
Liverwort	UC1920632	109974	Micropterygium	trachyphyllum	Lepidoziaceae	On bark of Guarea along Trail "A" in cloud forest on moderate slopes of the watershed of the Quebrada Verde in the Cordillera de TilarÃ¡n along Highway 142 about 15 km north of San Ramon in San Ramon Canton, Angeles District.			2007-07-05	D. H. Norris
Liverwort	UC2053217	109976	Micropterygium	trachyphyllum	Lepidoziaceae	On bark of Guarea along Trail "A" in cloud forest on moderate slopes of the watershed of the Quebrada Verde in the Cordillera de TilarÃ¡n along Highway 142 about 15 km north of San Ramon in San Ramon Canton, Angeles District.			2007-07-05	D. H. Norris
Liverwort	UC2053282	111259	Micropterygium	trachyphyllum	Lepidoziaceae	On trunk of Guarea along Trail "A" of Nectandra Gardens near parking lot in area of cloud forest.			2010-03-11	D. H. Norris
Liverwort	UC2053819	22	Micropterygium	trachyphyllum	Lepidoziaceae	On bark of Guarea along trail "C" in the Nectandra Gardens in cloud forest.			2010-03-11	D. H. Norris
Liverwort	UC2053820	43	Micropterygium	trachyphyllum	Lepidoziaceae	On tree near laboratory in the Nectandra Gardens in cloud forest.			2010-03-11	D. H. Norris
Liverwort	UC2053663	110005	Lophocolea		Lophocoleaceae	On moist, diffusely lit branches of tree along Trail "A" in cloud forest on moderate slopes of the watershed of the Quebrada Verde in the Cordillera de TilarÃ¡n along Highway 142 about 15 km north of San Ramon in San Ramon Canton, Angeles District.			2007-07-05	D. H. Norris
Liverwort	UC2053661	110077	Lophocolea		Lophocoleaceae	On very moist, shaded log along Trail "E" in cloud forest on moderate slopes of the watershed of the Quebrada Verde in the Cordillera de TilarÃ¡n along Highway 142 about 15 km north of San Ramon in San Ramon Canton, Angeles District.			2007-07-05	D. H. Norris
Liverwort	UC2053664	110138	Lophocolea		Lophocoleaceae	On moist, shaded log along Trail "E" in cloud forest on moderate slopes of the watershed of the Quebrada Verde in the Cordillera de TilarÃ¡n along Highway 142 about 15 km north of San Ramon in San Ramon Canton, Angeles District.			2007-07-05	D. H. Norris
Liverwort	UC2053330	110244	Lophocolea		Lophocoleaceae	On moist, diffusely lit base of large and isolated tree at crest of Trail "A" in cloud forest border adjacent to pastured lands on moderate slopes of the watershed of the Quebrada Verde in the Cordillera de TilarÃ¡n along Highway 142 about 15 km north of San Ramon in San Ramon Canton, Angeles District.			2007-07-05	D. H. Norris
Liverwort	UC2053329	110349	Lophocolea		Lophocoleaceae	On moist, shaded small tree along Trail "E" in cloud forest on moderate slopes of the watershed of the Quebrada Verde in the Cordillera de TilarÃ¡n along Highway 142 about 15 km north of San Ramon in San Ramon Canton, Angeles District.			2007-07-05	D. H. Norris
Liverwort	UC2053331	110537	Lophocolea		Lophocoleaceae	On moist, shaded dead spar in cloud forest along Trail "E" on moderate slopes of the watershed of the Quebrada Verde in the Cordillera de TilarÃ¡n at Nectandra Gardens along Highway 142 about 15 km north of San Ramon in San Ramon Canton, Angeles District.			2007-07-05	D. H. Norris
Liverwort	UC2053899	11	Lophocolea		Lophocoleaceae	On tree in partial shade in the Nectandra Gardens in cloud forest.			2010-03-11	D. H. Norris
Liverwort	UC2053669	110369	Marchantia	paleacea	Marchantiaceae	On moist, diffusely lit rock wall along Trail "C" in cloud forest on moderate slopes of the watershed of the Quebrada Verde in the Cordillera de TilarÃ¡n along Highway 142 about 15 km north of San Ramon in San Ramon Canton, Angeles District.			2007-07-05	D. H. Norris
Liverwort	UC2053668	110439	Marchantia	paleacea	Marchantiaceae	On very moist, diffusely lit rock wall at edge of cloud forest on moderate slopes of the watershed of the Quebrada Verde in the Cordillera de TilarÃ¡n at entrance to Nectandra Gardens along Highway 142 about 15 km north of San Ramon in San Ramon Canton, Angeles District.			2007-07-05	D. H. Norris
Liverwort	UC2053667	110449	Marchantia	paleacea	Marchantiaceae	On very moist, diffusely lit rock wall at edge of cloud forest on moderate slopes of the watershed of the Quebrada Verde in the Cordillera de TilarÃ¡n at entrance to Nectandra Gardens along Highway 142 about 15 km north of San Ramon in San Ramon Canton, Angeles District.			2007-07-05	D. H. Norris
Liverwort	UC2053356	110452	Marchantia	paleacea	Marchantiaceae	In large mats on soil in road right-of-way at edge of cloud forest on moderate slopes of the watershed of the Quebrada Verde in the Cordillera de TilarÃ¡n at entrance to Nectandra Gardens along Highway 142 about 15 km north of San Ramon in San Ramon Canton, Angeles District.			2007-07-05	D. H. Norris
Liverwort	UC2053791	5711	Marchantia	paleacea	Marchantiaceae	On vertical face of stone near conference center along trail in Nectandra Gardens.			2010-03-12	D. H. Norris
Liverwort	UC2053896	36	Marchantia	paleacea	Marchantiaceae	On tree near laboratory in the Nectandra Gardens in cloud forest.			2010-03-11	D. H. Norris
Liverwort		110044B	Metzgeria		Metzgeriaceae	On moist, sunny limb of tree at crest of Trail "A" in cloud forest border adjacent to pastured lands on moderate slopes of the watershed of the Quebrada Verde in the Cordillera de TilarÃ¡n along Highway 142 about 15 km north of San Ramon in San Ramon Canton, Angeles District.			2007-07-05	D. H. Norris
Liverwort		110061	Metzgeria		Metzgeriaceae	On moist, diffusely lit stem of vine along Trail "E" in cloud forest on moderate slopes of the watershed of the Quebrada Verde in the Cordillera de TilarÃ¡n along Highway 142 about 15 km north of San Ramon in San Ramon Canton, Angeles District.			2007-07-05	D. H. Norris
Liverwort		110062J	Metzgeria		Metzgeriaceae	On moist, diffusely lit leaves of liana along Trail "E" in cloud forest on moderate slopes of the watershed of the Quebrada Verde in the Cordillera de TilarÃ¡n along Highway 142 about 15 km north of San Ramon in San Ramon Canton, Angeles District.			2007-07-05	D. H. Norris
Liverwort		110065H	Metzgeria		Metzgeriaceae	On very moist, diffusely lit leaf of palm along Trail "E" in cloud forest on moderate slopes of the watershed of the Quebrada Verde in the Cordillera de TilarÃ¡n along Highway 142 about 15 km north of San Ramon in San Ramon Canton, Angeles District.			2007-07-05	D. H. Norris
Liverwort		110161	Metzgeria		Metzgeriaceae	On moist, shaded leaves along Trail "E" in cloud forest on moderate slopes of the watershed of the Quebrada Verde in the Cordillera de TilarÃ¡n along Highway 142 about 15 km north of San Ramon in San Ramon Canton, Angeles District.			2007-07-05	D. H. Norris
Liverwort		110195	Metzgeria		Metzgeriaceae	On moist, sunny leaves of shrub at crest of Trail "A" in cloud forest border adjacent to pastured lands on moderate slopes of the watershed of the Quebrada Verde in the Cordillera de TilarÃ¡n along Highway 142 about 15 km north of San Ramon in San Ramon Canton, Angeles District.			2007-07-05	D. H. Norris
Liverwort		110300B	Metzgeria		Metzgeriaceae	On moist, diffusely lit stem of vine along Trail "E" in cloud forest on moderate slopes of the watershed of the Quebrada Verde in the Cordillera de TilarÃ¡n along Highway 142 about 15 km north of San Ramon in San Ramon Canton, Angeles District.			2007-07-05	D. H. Norris
Liverwort		110573	Metzgeria		Metzgeriaceae	On moist, shaded bark of tree in cloud forest along Trail "E" on moderate slopes of the watershed of the Quebrada Verde in the Cordillera de TilarÃ¡n at Nectandra Gardens along Highway 142 about 15 km north of San Ramon in San Ramon Canton, Angeles District.			2007-07-05	D. H. Norris
Liverwort	UC2053216	109970	Metzgeria	albinea	Metzgeriaceae	On shaded, clayey soil along Trail "A" in cloud forest along road on moderate slopes of the watershed of the Quebrada Verde in the Cordillera de TilarÃ¡n along Highway 142 about 15 km north of San Ramon in San Ramon Canton, Angeles District.			2007-07-05	D. H. Norris
Liverwort	UC2053381	110156	Metzgeria	albinea	Metzgeriaceae	On moist, shaded branches of shrub along Trail "E" in cloud forest on moderate slopes of the watershed of the Quebrada Verde			2007-07-05	D. H. Norris
Liverwort	UC2054061	110191B	Metzgeria	albinea	Metzgeriaceae	On moist, sunny limbs of shrub at crest of Trail "A" in cloud forest border			2007-07-05	D. H. Norris
Liverwort	UC2053857	110195C	Metzgeria	albinea	Metzgeriaceae	On moist, sunny twigs of shrub at crest of Trail "A" in cloud forest border adjacent to pastured lands			2007-07-05	D. H. Norris
Liverwort	UC2053233	110223	Metzgeria	albinea	Metzgeriaceae	On moist, sunny fencepost at crest of Trail "A" in cloud forest border adjacent to pastured lands on moderate slopes of the watershed of the Quebrada Verde			2007-07-05	D. H. Norris
Liverwort	UC2053232	110940	Metzgeria	albinea	Metzgeriaceae	On moist, diffusely lit bark of tree in open area beyond rope bridge in Nectandra Reserve.			2009-03-26	D. H. Norris
Liverwort	UC2053538	111029	Metzgeria	albinea	Metzgeriaceae	On base of shrub in the Nectandra Gardens in area of cloud forest.			23 April- 7 May 2009	D. H. Norris
Liverwort	UC2053542	111195	Metzgeria	albinea	Metzgeriaceae	On bark of tree in area of cloud forest.			2010-03-11	D. H. Norris
Liverwort	UC2053379	111002	Metzgeria	aurantiaca	Metzgeriaceae	On bark of tree in the Nectandra Gardens in area of cloud forest.			23 April- 7 May 2009	D. H. Norris
Liverwort	UC2053539	110031	Metzgeria	australis	Metzgeriaceae	On moist, rather sunny limb of tree at crest of Trail "A" in cloud forest border adjacent to pastured lands on moderate slopes of the watershed of the Quebrada Verde in the Cordillera de TilarÃ¡n along Highway 142 about 15 km north of San Ramon in San Ramon Canton, Angeles District.			2007-07-05	D. H. Norris
Liverwort	UC2053540	110104	Metzgeria	australis	Metzgeriaceae	Pendent from twigs of shrub along Trail "E" in cloud forest on moderate slopes of the watershed of the Quebrada Verde in the Cordillera de TilarÃ¡n along Highway 142 about 15 km north of San Ramon in San Ramon Canton, Angeles District.			2007-07-05	D. H. Norris
Liverwort		110489A	Metzgeria	australis	Metzgeriaceae	On moist, shaded bark of small tree at edge of cloud forest on moderate slopes of the watershed of the Quebrada Verde in the Cordillera de TilarÃ¡n at entrance to Nectandra Gardens along Highway 142 about 15 km north of San Ramon in San Ramon Canton, Angeles District.			2007-07-05	D. H. Norris
Liverwort	UC2053235	111008	Metzgeria	australis	Metzgeriaceae	On bark of tree in the Nectandra Gardens in area of cloud forest.			23 April- 7 May 2009	D. H. Norris
Liverwort	UC2053547	110546	Metzgeria	clavaeflora	Metzgeriaceae	On moist, shaded small tree in cloud forest along Trail "E" on moderate slopes of the watershed of the Quebrada Verde in the Cordillera de TilarÃ¡n at Nectandra Gardens along Highway 142 about 15 km north of San Ramon in San Ramon Canton, Angeles District.			2007-07-05	D. H. Norris
Liverwort		110145 J	Metzgeria	decipiens	Metzgeriaceae	On moist, shaded leaf of Araceae along Trail "E" in cloud forest			2007-07-05	D. H. Norris
Liverwort	UC2054065	110166 G	Metzgeria	decipiens	Metzgeriaceae	On moist, shaded leaf of Araceae along trail "E" in cloud forest			2007-07-05	D. H. Norris
Liverwort	UC2054058	110322B	Metzgeria	decipiens	Metzgeriaceae	ON moist, diffusely lit large log along Trail "E" in cloud forest			2007-07-05	D. H. Norris
Liverwort	UC2054058	110323B	Metzgeria	decipiens	Metzgeriaceae	ON moist, diffusely lit large log along Trail "E" in cloud forest			2007-07-05	D. H. Norris
Liverwort	UC2054064	110344A	Metzgeria	decipiens	Metzgeriaceae	On moist, shaded leaf of fern along Trail "E" in cloud forest			2007-07-05	D. H. Norris
Liverwort	UC2053638	110028	Metzgeria	decipiens	Metzgeriaceae	On moist, diffusely lit leaf sheaths of Alsophila at crest of Trail "A" in cloud forest border adjacent to pastured lands on moderate slopes of the watershed of the Quebrada Verde in the Cordillera de TilarÃ¡n along Highway 142 about 15 km north of San Ramon in San Ramon Canton, Angeles District.			2007-07-05	D. H. Norris
Liverwort	UC2054078	110215B	Metzgeria	decipiens	Metzgeriaceae	On moist, diffusely lit twig of shrub at crest of Trail "A" in cloud forest border			2007-07-05	D. H. Norris
Liverwort		110007	Metzgeria	leptoneura	Metzgeriaceae	On moist, diffusely lit branches of tree along Trail "A" in cloud forest on moderate slopes of the watershed of the Quebrada Verde in the Cordillera de TilarÃ¡n along Highway 142 about 15 km north of San Ramon in San Ramon Canton, Angeles District.			2007-07-05	D. H. Norris
Liverwort	UC2053639	110109	Metzgeria	leptoneura	Metzgeriaceae	Pendent from moist, shaded twigs of shrub along Trail "E" in cloud forest on moderate slopes of the watershed of the Quebrada Verde in the Cordillera de TilarÃ¡n along Highway 142 about 15 km north of San Ramon in San Ramon Canton, Angeles District.			2007-07-05	D. H. Norris
Liverwort	UC2053543	110115	Metzgeria	leptoneura	Metzgeriaceae	Pendent from moist, shaded twigs of shrub along Trail "E" in cloud forest on moderate slopes of the watershed of the Quebrada Verde in the Cordillera de TilarÃ¡n along Highway 142 about 15 km north of San Ramon in San Ramon Canton, Angeles District.			2007-07-05	D. H. Norris
Liverwort	UC2053541	110132	Metzgeria	leptoneura	Metzgeriaceae	Pendent from moist, shaded branches of shrub along Trail "E" in cloud forest on moderate slopes of the watershed of the Quebrada Verde in the Cordillera de TilarÃ¡n along Highway 142 about 15 km north of San Ramon in San Ramon Canton, Angeles District.			2007-07-05	D. H. Norris
Liverwort		110351	Metzgeria	leptoneura	Metzgeriaceae	On moist, shaded bark of small tree along Trail "E" in cloud forest on moderate slopes of the watershed of the Quebrada Verde in the Cordillera de TilarÃ¡n along Highway 142 about 15 km north of San Ramon in San Ramon Canton, Angeles District.			2007-07-05	D. H. Norris
Liverwort	UC2053231	110926	Metzgeria	leptoneura	Metzgeriaceae	On branches of sapling along creek at bridge in Nectandra Reserve.			2009-03-26	D. H. Norris
Liverwort	UC2053926	16	Metzgeria	leptoneura	Metzgeriaceae	In the Nectandra Gardens in cloud forest.			2010-03-11	D. H. Norris
Liverwort	UC2053854	110161C	Metzgeria		Metzgeriaceae	On moist, shaded leaves of shrub along Trail "E" in cloud forest			2007-07-05	D. H. Norris
Liverwort	UC2053230	110180	Metzgeria		Metzgeriaceae	On moist, sunny limbs of shrub at crest of Trail "A" in cloud forest border adjacent to pastured lands on moderate slopes of the watershed of the Quebrada Verde in the Cordillera de TilarÃ¡n along Highway 142 about 15 km north of San Ramon in San Ramon Canton, Angeles District.			2007-07-05	D. H. Norris
Liverwort	UC2054060	110195A	Metzgeria		Metzgeriaceae	On moist, sunny twigs of shrub at crest of Trail "A" in cloud forest border			2007-07-05	D. H. Norris
Liverwort	UC2054091	110243B	Metzgeria		Metzgeriaceae	On moist, diffusely lit base of large and isolated tree at crest of Trail "A" in cloud forest border			2007-07-05	D. H. Norris
Liverwort	UC2053858	110398D	Metzgeria		Metzgeriaceae	On moist, shaded leaves of shrub along Trail "C" in cloud forest			2007-07-05	D. H. Norris
Liverwort	UC2054063	110862F	Metzgeria		Metzgeriaceae	Pendant from small shrub with cordate leaves in canyon near entrance to the Nectandra Reserve where the small stream crosses the highway in cloud forest			2009-03-26	D. H. Norris
Liverwort	UC2054068	110862F	Metzgeria		Metzgeriaceae	Pendant from small shrub wih cordate leaves in canyon near entrance to the Nectandra Reserve where the small stream crosses the highway in cloud forest			2009-03-26	D. H. Norris
Liverwort	UC2053380	110884	Metzgeria	rufula	Metzgeriaceae	Pendent from branches of shrub in Nectandra Reserve.			2009-03-26	D. H. Norris
Liverwort	UC2054006	35	Metzgeria	rufula	Metzgeriaceae	On thin soil over rock in area of cloud forest.			2010-03-11	D. H. Norris
Liverwort	UC2053800	5746	Metzgeria	scyphigera	Metzgeriaceae	On soil along trail on the watershed of the Quebrada Verde in the Ocotea portion of the Nectandra Gardens.			2010-03-15	D. H. Norris
Liverwort	UC2053549	109980	Monoclea		Monocleaceae	On moist and shaded stones along Trail "A" in cloud forest on moderate slopes of the watershed of the Quebrada Verde in the Cordillera de TilarÃ¡n along Highway 142 about 15 km north of San Ramon in San Ramon Canton, Angeles District.			2007-07-05	D. H. Norris
Liverwort	UC2053635	110073	Monoclea		Monocleaceae	On very moist, shaded rounded boulder in stream along Trail "E" in cloud forest on moderate slopes of the watershed of the Quebrada Verde in the Cordillera de TilarÃ¡n along Highway 142 about 15 km north of San Ramon in San Ramon Canton, Angeles District.			2007-07-05	D. H. Norris
Liverwort	UC2053623	1	Monoclea		Monocleaceae	On stone			2010-03-11	D. H. Norris
Liverwort	UC2053632	110129	Monoclea	gottschei	Monocleaceae	On moist, shaded log along Trail "E" in cloud forest on moderate slopes of the watershed of the Quebrada Verde in the Cordillera de TilarÃ¡n along Highway 142 about 15 km north of San Ramon in San Ramon Canton, Angeles District.			2007-07-05	D. H. Norris
Liverwort	UC2053262	110912	Monoclea		Monocleaceae	On rocks in estero at bridge in Nectandra Reserve.			2009-03-26	D. H. Norris
Liverwort	UC2054035	110402I	Lepidozia		Lepidoziaceae	On moist, shaded leaves of shrub along Trail "C" in cloud forest			2007-07-05	D. H. Norris
Liverwort	UC2053240	110208	Pallavicinia		Pallaviciniaceae	On moist, shaded twigs of shrub at crest of Trail "A" in cloud forest border adjacent to pastured lands on moderate slopes of the watershed of the Quebrada Verde			2007-07-05	D. H. Norris
Liverwort	UC2053236	110400	Pallavicinia		Pallaviciniaceae	On moist, shaded buttress of large tree along intermittent stream along Trail "C" in cloud forest on moderate slopes of the watershed of the Quebrada Verde in the Cordillera de TilarÃ¡n along Highway 142 about 15 km north of San Ramon in San Ramon Canton, Angeles District.			2007-07-05	D. H. Norris
Liverwort	UC2053237	111234	Pallavicinia		Pallaviciniaceae	On log in area of cloud forest			2010-03-11	D. H. Norris
Liverwort		110036	Pallavicinia	lyellii	Pallaviciniaceae	On moist, shaded soil in ditch at crest of Trail "A" in cloud forest border adjacent to pastured lands on moderate slopes of the watershed of the Quebrada Verde in the Cordillera de TilarÃ¡n along Highway 142 about 15 km north of San Ramon in San Ramon Canton, Angeles District.			2007-07-05	D. H. Norris
Liverwort		110200	Pallavicinia	lyellii	Pallaviciniaceae	On moist, diffusely lit soil at edge of clearing at crest of Trail "A" in cloud forest border adjacent to pastured lands on moderate slopes of the watershed of the Quebrada Verde in the Cordillera de TilarÃ¡n along Highway 142 about 15 km north of San Ramon in San Ramon Canton, Angeles District.			2007-07-05	D. H. Norris
Liverwort	UC2053871	110200B	Pallavicinia	lyellii	Pallaviciniaceae	On moist, diffusely lit soil at edge of clearing at crest of Trail "A" in cloud forest border			2007-07-05	D. H. Norris
Liverwort		110210	Pallavicinia	lyellii	Pallaviciniaceae	On moist, diffusely lit soil on root wad of recently fallen tree at crest of Trail "A" in cloud forest border adjacent to pastured lands on moderate slopes of the watershed of the Quebrada Verde			2007-07-05	D. H. Norris
Liverwort	UC2053264	111225	Symphyogyna		Pallaviciniaceae	On log in area of cloud forest			2010-03-11	D. H. Norris
Liverwort	UC2053647	110285	Symphyogyna	brongniartii	Pallaviciniaceae	On moist, diffusely lit rock in small creek at crest of Trail "A" in cloud forest border adjacent to pastured lands on moderate slopes of the watershed of the Quebrada Verde in the Cordillera de TilarÃ¡n along Highway 142 about 15 km north of San Ramon in San Ramon Canton, Angeles District.			2007-07-05	D. H. Norris
Liverwort	UC2053643	110526	Symphyogyna	brongniartii	Pallaviciniaceae	On moist, diffusely lit rock wall in cloud forest on moderate slopes of the watershed of the Quebrada Verde in the Cordillera de TilarÃ¡n near headquarters of Nectandra Gardens along Highway 142 about 15 km north of San Ramon in San Ramon Canton, Angeles District.			2007-07-05	D. H. Norris
Liverwort	UC2053646	110527	Symphyogyna	brongniartii	Pallaviciniaceae	On moist, diffusely lit rock wall in cloud forest on moderate slopes of the watershed of the Quebrada Verde in the Cordillera de TilarÃ¡n near headquarters of Nectandra Gardens along Highway 142 about 15 km north of San Ramon in San Ramon Canton, Angeles District.			2007-07-05	D. H. Norris
Liverwort	UC2053747	17174	Symphyogyna	brongniartii	Pallaviciniaceae	On trunk of tree at edge of cloud forest abutting on Dracaena plantation.			2010-03-11	D. H. Norris
Liverwort	UC2053656	110087	Symphyogyna	brongniartii	Pallaviciniaceae	On very moist, shaded rounded boulder on bank of stream along Trail "E" in cloud forest on moderate slopes of the watershed of the Quebrada Verde in the Cordillera de TilarÃ¡n along Highway 142 about 15 km north of San Ramon in San Ramon Canton, Angeles District.			2007-07-05	D. H. Norris
Liverwort		110136	Symphyogyna	brongniartii	Pallaviciniaceae	On moist, shaded log along Trail "E" in cloud forest on moderate slopes of the watershed of the Quebrada Verde in the Cordillera de TilarÃ¡n along Highway 142 about 15 km north of San Ramon in San Ramon Canton, Angeles District.			2007-07-05	D. H. Norris
Liverwort		110163 D	Symphyogyna	brongniartii	Pallaviciniaceae	On moist, shaded bark of small tree along Trail "E" in cloud forest on moderate slopes of the watershed of the Quebrada Verde in the Cordillera de TilarÃ¡n along Highway 142 about 15 km north of San Ramon in San Ramon Canton, Angeles District.			2007-07-05	D. H. Norris
Liverwort	UC2053239	110205	Symphyogyna	brongniartii	Pallaviciniaceae	On moist, shaded soil at crest of Trail "A" in cloud forest border adjacent to pastured lands on moderate slopes of the watershed of the Quebrada Verde			2007-07-05	D. H. Norris
Liverwort	UC2053271	111218	Symphyogyna	brongniartii	Pallaviciniaceae	On moist, diffusely lit base of tree in area of cloud forest			2010-03-11	D. H. Norris
Liverwort	UC2053268	111222	Symphyogyna	brongniartii	Pallaviciniaceae	On log in area of cloud forest			2010-03-11	D. H. Norris
Liverwort	UC2053728	17145	Symphyogyna	brongniartii	Pallaviciniaceae	The watershed of the Quebrada Verde.			2010-03-11	D. H. Norris
Liverwort	UC2053625	3	Symphyogyna	brongniartii	Pallaviciniaceae	On soil in area of cloud forest			2010-03-11	D. H. Norris
Liverwort	UC2053788	4	Symphyogyna	brongniartii	Pallaviciniaceae	On branch of tree in area of cloud forest			2010-03-11	D. H. Norris
Liverwort	UC2053913	2	Symphyogyna	brongniartii	Pallaviciniaceae	In the Nectandra Gardens in cloud forest.			2010-03-11	D. H. Norris
Liverwort		110389	Pellia		Pelliaceae	On moist, shaded boulder along intermittent stream along Trail "C" in cloud forest on moderate slopes of the watershed of the Quebrada Verde in the Cordillera de TilarÃ¡n along Highway 142 about 15 km north of San Ramon in San Ramon Canton, Angeles District.			2007-07-05	D. H. Norris
Liverwort	UC2053273	110477	Phycolepidozia		Phycolepidoziaceae	On moist, diffusely lit twigs at edge of cloud forest on moderate slopes of the watershed of the Quebrada Verde in the Cordillera de TilarÃ¡n at entrance to Nectandra Gardens along Highway 142 about 15 km north of San Ramon in San Ramon Canton, Angeles District.			2007-07-05	D. H. Norris
Liverwort	UC2053200	110024	Plagiochila		Plagiochilaceae	On stems of shrub along Trail "A" in cloud forest on moderate slopes of the watershed of the Quebrada Verde in the Cordillera de TilarÃ¡n along Highway 142 about 15 km north of San Ramon in San Ramon Canton, Angeles District.			2007-07-05	D. H. Norris
Liverwort		110027	Plagiochila		Plagiochilaceae	On twigs of Rubiaceae shrub at crest of Trail "A" in cloud forest border adjacent to pastured lands on moderate slopes of the watershed of the Quebrada Verde in the Cordillera de TilarÃ¡n along Highway 142 about 15 km north of San Ramon in San Ramon Canton, Angeles District.			2007-07-05	D. H. Norris
Liverwort		110030	Plagiochila		Plagiochilaceae	On moist, diffusely lit bark of sapling at crest of Trail "A" in cloud forest border adjacent to pastured lands on moderate slopes of the watershed of the Quebrada Verde in the Cordillera de TilarÃ¡n along Highway 142 about 15 km north of San Ramon in San Ramon Canton, Angeles District.			2007-07-05	D. H. Norris
Liverwort		110099	Plagiochila		Plagiochilaceae	On moist, diffusely lit top of large rock in stream along Trail "E" in cloud forest on moderate slopes of the watershed of the Quebrada Verde in the Cordillera de TilarÃ¡n along Highway 142 about 15 km north of San Ramon in San Ramon Canton, Angeles District.			2007-07-05	D. H. Norris
Liverwort		110197	Plagiochila		Plagiochilaceae	On moist, sunny fencepost at crest of Trail "A" in cloud forest border adjacent to pastured lands on moderate slopes of the watershed of the Quebrada Verde in the Cordillera de TilarÃ¡n along Highway 142 about 15 km north of San Ramon in San Ramon Canton, Angeles District.			2007-07-05	D. H. Norris
Liverwort		110281	Plagiochila		Plagiochilaceae	On moist, sunny fencepost at crest of Trail "A" in cloud forest border adjacent to pastured lands on moderate slopes of the watershed of the Quebrada Verde in the Cordillera de TilarÃ¡n along Highway 142 about 15 km north of San Ramon in San Ramon Canton, Angeles District.			2007-07-05	D. H. Norris
Liverwort		110300A	Plagiochila		Plagiochilaceae	On moist, diffusely lit stem of vine along Trail "E" in cloud forest on moderate slopes of the watershed of the Quebrada Verde in the Cordillera de TilarÃ¡n along Highway 142 about 15 km north of San Ramon in San Ramon Canton, Angeles District.			2007-07-05	D. H. Norris
Liverwort		110322	Plagiochila		Plagiochilaceae	On moist, diffusely lit large log along Trail "E" in cloud forest on moderate slopes of the watershed of the Quebrada Verde in the Cordillera de TilarÃ¡n along Highway 142 about 15 km north of San Ramon in San Ramon Canton, Angeles District.			2007-07-05	D. H. Norris
Liverwort		110395C	Plagiochila		Plagiochilaceae	On moist, shaded twigs of recently fallen tree along intermittent stream along Trail "C" in cloud forest on moderate slopes of the watershed of the Quebrada Verde in the Cordillera de TilarÃ¡n along Highway 142 about 15 km north of San Ramon in San Ramon Canton, Angeles District.			2007-07-05	D. H. Norris
Liverwort		110430	Plagiochila		Plagiochilaceae	On moist, shaded leaves of shrub along Trail "C" in cloud forest on moderate slopes of the watershed of the Quebrada Verde in the Cordillera de TilarÃ¡n along Highway 142 about 15 km north of San Ramon in San Ramon Canton, Angeles District.			2007-07-05	D. H. Norris
Liverwort	UC2053703	110066	Plagiochila		Plagiochilaceae	On very moist, shaded sapling along Trail "E" in cloud forest on moderate slopes of the watershed of the Quebrada Verde in the Cordillera de TilarÃ¡n along Highway 142 about 15 km north of San Ramon in San Ramon Canton, Angeles District.			2007-07-05	D. H. Norris
Liverwort	UC2053704	110067	Plagiochila		Plagiochilaceae	On moist, shaded branch of shrub along Trail "E" in cloud forest on moderate slopes of the watershed of the Quebrada Verde in the Cordillera de TilarÃ¡n along Highway 142 about 15 km north of San Ramon in San Ramon Canton, Angeles District.			2007-07-05	D. H. Norris
Liverwort	UC2053560	110068	Plagiochila		Plagiochilaceae	On moist, shaded dead twig along Trail "E" in cloud forest on moderate slopes of the watershed of the Quebrada Verde in the Cordillera de TilarÃ¡n along Highway 142 about 15 km north of San Ramon in San Ramon Canton, Angeles District.			2007-07-05	D. H. Norris
Liverwort	UC2053705	110078	Plagiochila		Plagiochilaceae	On very moist to submerged, diffusely lit rounded boulder in stream along Trail "E" in cloud forest on moderate slopes of the watershed of the Quebrada Verde in the Cordillera de TilarÃ¡n along Highway 142 about 15 km north of San Ramon in San Ramon Canton, Angeles District.			2007-07-05	D. H. Norris
Liverwort	UC2053559	110083	Plagiochila		Plagiochilaceae	On moist, shaded rounded boulder on bank of stream along Trail "E" in cloud forest on moderate slopes of the watershed of the Quebrada Verde in the Cordillera de TilarÃ¡n along Highway 142 about 15 km north of San Ramon in San Ramon Canton, Angeles District.			2007-07-05	D. H. Norris
Liverwort	UC2053557	110105	Plagiochila		Plagiochilaceae	Pendent from twigs of shrub along Trail "E" in cloud forest on moderate slopes of the watershed of the Quebrada Verde in the Cordillera de TilarÃ¡n along Highway 142 about 15 km north of San Ramon in San Ramon Canton, Angeles District.			2007-07-05	D. H. Norris
Liverwort	UC2053558	110108	Plagiochila		Plagiochilaceae	Pendent from moist, shaded twigs of shrub along Trail "E" in cloud forest on moderate slopes of the watershed of the Quebrada Verde in the Cordillera de TilarÃ¡n along Highway 142 about 15 km north of San Ramon in San Ramon Canton, Angeles District.			2007-07-05	D. H. Norris
Liverwort	UC2053561	110122	Plagiochila		Plagiochilaceae	Onm moist, shaded branches of shrub along Trail "E" in cloud forest on moderate slopes of the watershed of the Quebrada Verde in the Cordillera de TilarÃ¡n along Highway 142 about 15 km north of San Ramon in San Ramon Canton, Angeles District.			2007-07-05	D. H. Norris
Liverwort	UC2053546	110131	Plagiochila		Plagiochilaceae	Pendent from moist, shaded branches of shrub along Trail "E" in cloud forest on moderate slopes of the watershed of the Quebrada Verde in the Cordillera de TilarÃ¡n along Highway 142 about 15 km north of San Ramon in San Ramon Canton, Angeles District.			2007-07-05	D. H. Norris
Liverwort	UC2053555	110133	Plagiochila		Plagiochilaceae	Pendent from moist, shaded branches of shrub along Trail "E" in cloud forest on moderate slopes of the watershed of the Quebrada Verde in the Cordillera de TilarÃ¡n along Highway 142 about 15 km north of San Ramon in San Ramon Canton, Angeles District.			2007-07-05	D. H. Norris
Liverwort	UC2053545	110137	Plagiochila		Plagiochilaceae	On moist, shaded log along Trail "E" in cloud forest on moderate slopes of the watershed of the Quebrada Verde in the Cordillera de TilarÃ¡n along Highway 142 about 15 km north of San Ramon in San Ramon Canton, Angeles District.			2007-07-05	D. H. Norris
Liverwort	UC2053189	110144	Plagiochila		Plagiochilaceae	On moist, shaded leaf of palm along Trail "E" in cloud forest on moderate slopes of the watershed of the Quebrada Verde in the Cordillera de TilarÃ¡n along Highway 142 about 15 km north of San Ramon in San Ramon Canton, Angeles District.			2007-07-05	D. H. Norris
Liverwort	UC2054097	110161A	Plagiochila		Plagiochilaceae	On moist, shaded leaves of shrub along Trail "E" in cloud forest			2007-07-05	D. H. Norris
Liverwort	UC2053178	110162	Plagiochila		Plagiochilaceae	On moist, shaded bark of small tree along Trail "E" in cloud forest on moderate slopes of the watershed of the Quebrada Verde in the Cordillera de TilarÃ¡n along Highway 142 about 15 km north of San Ramon in San Ramon Canton, Angeles District.			2007-07-05	D. H. Norris
Liverwort	UC2054071	110191D	Plagiochila		Plagiochilaceae	On moist, sunny limbs of shurb at crest of Trail "A" in cloud forest border adjacent to pastured lands			2007-07-05	D. H. Norris
Liverwort	UC2053179	110196	Plagiochila		Plagiochilaceae	On moist, sunny fencepost at crest of Trail "A" in cloud forest border			2007-07-05	D. H. Norris
Liverwort	UC2053170	110204	Plagiochila		Plagiochilaceae	On moist, shaded bark of large tree at crest of Trail "A" in cloud forest border adjacent to pastured lands on moderate slopes of the watershed of the Quebrada Verde			2007-07-05	D. H. Norris
Liverwort		110219A	Plagiochila		Plagiochilaceae	On moist, sunny fencepost at crest of Trail "A" in cloud forest border			2007-07-05	D. H. Norris
Liverwort	UC2053172	110254	Plagiochila		Plagiochilaceae	On moist, diffusely lit branches of small tree at crest of Trail "A" in cloud forest border adjacent to pastured lands on moderate slopes of the watershed of the Quebrada Verde in the Cordillera de TilarÃ¡n along Highway 142 about 15 km north of San Ramon in San Ramon Canton, Angeles District.			2007-07-05	D. H. Norris
Liverwort	UC2053171	110257	Plagiochila		Plagiochilaceae	On moist, diffusely lit branches of small tree at crest of Trail "A" in cloud forest border adjacent to pastured lands on moderate slopes of the watershed of the Quebrada Verde in the Cordillera de TilarÃ¡n along Highway 142 about 15 km north of San Ramon in San Ramon Canton, Angeles District.			2007-07-05	D. H. Norris
Liverwort	UC2053166	110271	Plagiochila		Plagiochilaceae	On moist, sunny fencepost at crest of Trail "A" in cloud forest border adjacent to pastured lands on moderate slopes of the watershed of the Quebrada Verde in the Cordillera de TilarÃ¡n along Highway 142 about 15 km north of San Ramon in San Ramon Canton, Angeles District.			2007-07-05	D. H. Norris
Liverwort	UC2053168	110288	Plagiochila		Plagiochilaceae	On moist, diffusely lit rock in small creek at crest of Trail "A" in cloud forest border adjacent to pastured lands on moderate slopes of the watershed of the Quebrada Verde in the Cordillera de TilarÃ¡n along Highway 142 about 15 km north of San Ramon in San Ramon Canton, Angeles District.			2007-07-05	D. H. Norris
Liverwort		110296	Plagiochila		Plagiochilaceae	On moist, shaded branch of shrub in small creek at crest of Trail "A" in cloud forest border adjacent to pastured lands on moderate slopes of the watershed of the Quebrada Verde in the Cordillera de TilarÃ¡n along Highway 142 about 15 km north of San Ramon in San Ramon Canton, Angeles District.			2007-07-05	D. H. Norris
Liverwort	UC2053190	110327	Plagiochila		Plagiochilaceae	On moist, shaded rocks along Trail "E" in cloud forest on moderate slopes of the watershed of the Quebrada Verde in the Cordillera de TilarÃ¡n along Highway 142 about 15 km north of San Ramon in San Ramon Canton, Angeles District.			2007-07-05	D. H. Norris
Liverwort	UC2053191	110328	Plagiochila		Plagiochilaceae	On moist, shaded rocks along Trail "E" in cloud forest on moderate slopes of the watershed of the Quebrada Verde in the Cordillera de TilarÃ¡n along Highway 142 about 15 km north of San Ramon in San Ramon Canton, Angeles District.			2007-07-05	D. H. Norris
Liverwort	UC2053197	110347	Plagiochila		Plagiochilaceae	On moist, shaded rock along Trail "E" in cloud forest on moderate slopes of the watershed of the Quebrada Verde in the Cordillera de TilarÃ¡n along Highway 142 about 15 km north of San Ramon in San Ramon Canton, Angeles District.			2007-07-05	D. H. Norris
Liverwort	UC2053175	110355	Plagiochila		Plagiochilaceae	On moist, diffusely lit boulder along Trail "C" in cloud forest on moderate slopes of the watershed of the Quebrada Verde in the Cordillera de TilarÃ¡n along Highway 142 about 15 km north of San Ramon in San Ramon Canton, Angeles District.			2007-07-05	D. H. Norris
Liverwort	UC2053202	110372	Plagiochila		Plagiochilaceae	On moist, diffusely lit rock wall along Trail "C" in cloud forest on moderate slopes of the watershed of the Quebrada Verde in the Cordillera de TilarÃ¡n along Highway 142 about 15 km north of San Ramon in San Ramon Canton, Angeles District.			2007-07-05	D. H. Norris
Liverwort	UC2053530	110377	Plagiochila		Plagiochilaceae	On moist, shaded dead twig along Trail "C" in cloud forest on moderate slopes of the watershed of the Quebrada Verde in the Cordillera de TilarÃ¡n along Highway 142 about 15 km north of San Ramon in San Ramon Canton, Angeles District.			2007-07-05	D. H. Norris
Liverwort	UC2053176	110388	Plagiochila		Plagiochilaceae	On moist, shaded boulder along intermittent stream along Trail "C" in cloud forest on moderate slopes of the watershed of the Quebrada Verde in the Cordillera de TilarÃ¡n along Highway 142 about 15 km north of San Ramon in San Ramon Canton, Angeles District.			2007-07-05	D. H. Norris
Liverwort	UC2053174	110391	Plagiochila		Plagiochilaceae	On moist, shaded boulder along intermittent stream along Trail "C" in cloud forest on moderate slopes of the watershed of the Quebrada Verde in the Cordillera de TilarÃ¡n along Highway 142 about 15 km north of San Ramon in San Ramon Canton, Angeles District.			2007-07-05	D. H. Norris
Liverwort	UC2054096	110396C	Plagiochila		Plagiochilaceae	On moist, shaded twigs of recently fallen tree along intermittent stream along Trail "C" in cloud forest			2007-07-05	D. H. Norris
Liverwort	UC2053177	110397	Plagiochila		Plagiochilaceae	On moist, shaded twigs of recently fallen tree along intermittent stream along Trail "C" in cloud forest on moderate slopes of the watershed of the Quebrada Verde in the Cordillera de TilarÃ¡n along Highway 142 about 15 km north of San Ramon in San Ramon Canton, Angeles District.			2007-07-05	D. H. Norris
Liverwort	UC2053165	110448	Plagiochila		Plagiochilaceae	On very moist, diffusely lit rock wall at edge of cloud forest on moderate slopes of the watershed of the Quebrada Verde in the Cordillera de TilarÃ¡n at entrance to Nectandra Gardens along Highway 142 about 15 km north of San Ramon in San Ramon Canton, Angeles District.			2007-07-05	D. H. Norris
Liverwort	UC2053164	110494	Plagiochila		Plagiochilaceae	On moist, shaded bark of tree at edge of cloud forest on moderate slopes of the watershed of the Quebrada Verde in the Cordillera de TilarÃ¡n at entrance to Nectandra Gardens along Highway 142 about 15 km north of San Ramon in San Ramon Canton, Angeles District.			2007-07-05	D. H. Norris
Liverwort	UC2053192	110507	Plagiochila		Plagiochilaceae	On very moist, rather shaded rock wall in cloud forest on moderate slopes of the watershed of the Quebrada Verde in the Cordillera de TilarÃ¡n near headquarters of Nectandra Gardens along Highway 142 about 15 km north of San Ramon in San Ramon Canton, Angeles District.			2007-07-05	D. H. Norris
Liverwort	UC2053196	110556	Plagiochila		Plagiochilaceae	On moist, shaded bark of tree in cloud forest along Trail "E" on moderate slopes of the watershed of the Quebrada Verde in the Cordillera de TilarÃ¡n at Nectandra Gardens along Highway 142 about 15 km north of San Ramon in San Ramon Canton, Angeles District.			2007-07-05	D. H. Norris
Liverwort	UC2053194	110565	Plagiochila		Plagiochilaceae	On moist, shaded stem of vine in cloud forest along Trail "E" on moderate slopes of the watershed of the Quebrada Verde in the Cordillera de TilarÃ¡n at Nectandra Gardens along Highway 142 about 15 km north of San Ramon in San Ramon Canton, Angeles District.			2007-07-05	D. H. Norris
Liverwort	UC2053702	110572	Plagiochila		Plagiochilaceae	On moist, shaded bark of tree in cloud forest along Trail "E" on moderate slopes of the watershed of the Quebrada Verde in the Cordillera de TilarÃ¡n at Nectandra Gardens along Highway 142 about 15 km north of San Ramon in San Ramon Canton, Angeles District.			2007-07-05	D. H. Norris
Liverwort	UC2053193	110588	Plagiochila		Plagiochilaceae	On moist, diffusely lit twigs of shrub in cloud forest along Trail "E" on moderate slopes of the watershed of the Quebrada Verde in the Cordillera de TilarÃ¡n at Nectandra Gardens along Highway 142 about 15 km north of San Ramon in San Ramon Canton, Angeles District.			2007-07-05	D. H. Norris
Liverwort	UC2053186	110839	Plagiochila		Plagiochilaceae	On moist, diffusely lit bark of tree along boundary of the Nectandra Reserve at top of Trail "A" in cloud forest.			2009-03-26	D. H. Norris
Liverwort	UC2054095	110862E	Plagiochila		Plagiochilaceae	Pendant from small shrub with cordate leaes in canyon near entrance to the Nectanda Reserve where the small streem crosses the highway in cloud forest			2009-03-26	D. H. Norris
Liverwort	UC2053188	110867	Plagiochila		Plagiochilaceae	On moist to submerged rounded boulder in stream in canyon near entrance to the Nectandra Reserve where the small stream crosses the highway in cloud forest.			2009-03-26	D. H. Norris
Liverwort	UC2053162	110872	Plagiochila		Plagiochilaceae	Pendent from stem of palm in Nectandra Reserve.			2009-03-26	D. H. Norris
Liverwort	UC2053536	110875	Plagiochila		Plagiochilaceae	Pendent from small tree in Nectandra Reserve.			2009-03-26	D. H. Norris
Liverwort	UC2053161	110882	Plagiochila		Plagiochilaceae	Pendent from small sapling in Nectandra Reserve.			2009-03-26	D. H. Norris
Liverwort	UC2053201	110885	Plagiochila		Plagiochilaceae	On shaded bark of Turpinea in Nectandra Reserve.			2009-03-26	D. H. Norris
Liverwort	UC2053163	110909	Plagiochila		Plagiochilaceae	On rocks in estero at bridge in Nectandra Reserve.			2009-03-26	D. H. Norris
Liverwort	UC2053195	111001	Plagiochila		Plagiochilaceae	On bark of tree in the Persea portion of the Nectandra Gardens in area of cloud forest.			23 April- 7 May 2009	D. H. Norris
Liverwort	UC2053529	111038	Plagiochila		Plagiochilaceae	On branches of shrub in the Nectandra Gardens in area of cloud forest.			23 April- 7 May 2009	D. H. Norris
Liverwort	UC2053203	111049	Plagiochila		Plagiochilaceae	On bark of large tree in the Nectandra Gardens in area of cloud forest			2009-04-23	D. H. Norris
Liverwort	UC2053199	111053	Plagiochila		Plagiochilaceae	On bark of large tree in the Nectandra Gardens in area of cloud forest			2009-04-23	D. H. Norris
Liverwort	UC2053183	111064	Plagiochila		Plagiochilaceae	On leaf in the Nectandra Gardens in area of cloud forest			23-4-2009	D. H. Norris
Liverwort	UC2053184	111068	Plagiochila		Plagiochilaceae	On trunk of tree in the Nectandra Gardens in area of cloud forest			2009-04-23	D. H. Norris
Liverwort	UC2053185	111070	Plagiochila		Plagiochilaceae	On trunk of tree in the Nectandra Gardens in area of cloud forest			2009-04-23	D. H. Norris
Liverwort	UC2054074	111087B	Plagiochila		Plagiochilaceae	On bark of tree in the Nectandra Gardens in area of cloud forest			2009-03-26	D. H. Norris
Liverwort	UC2054073	111093B	Plagiochila		Plagiochilaceae	On sunny fencepost at edge of Ocotea potion of nectadra Gardens in area of cloud forest			2009-03-26	D. H. Norris
Liverwort	UC2053160	111201	Plagiochila		Plagiochilaceae	On moist, diffusely lit base of concrete wall in area of cloud forest			2010-03-11	D. H. Norris
Liverwort	UC2053198	111256	Plagiochila		Plagiochilaceae	On small branches of shrub near waterline of small stream along Trail "E" of Nectandra Gardens near rope bridge in area of cloud forest			2010-03-11	D. H. Norris
Liverwort	UC2053182	111261	Plagiochila		Plagiochilaceae	ON small branches of shrub along Trail "E" of Nectandra Gardens near ropes bridge in area of cloud forest			2010-03-11	D. H. Norris
Liverwort	UC2053753	17182	Plagiochila		Plagiochilaceae	On trunk of tree at edge of cloud forest abutting on Dracaena plantation.			2010-03-11	D. H. Norris
Liverwort	UC2053758	17187	Plagiochila		Plagiochilaceae	On boulder in stream at edge of multi-layered tropical cloud forest abutting on Dracaena plantation.			2010-03-11	D. H. Norris
Liverwort	UC2053761	17191	Plagiochila		Plagiochilaceae	On boulder in stream at edge of multi-layered tropical cloud forest abutting on Dracaena plantation.			2010-03-11	D. H. Norris
Liverwort	UC2053769	17199	Plagiochila		Plagiochilaceae	On liana overarching stream at edge of multi-layered tropical cloud forest abutting on Dracaena plantation.			2010-03-11	D. H. Norris
Liverwort	UC2053771	17204	Plagiochila		Plagiochilaceae	On boulder near stream at edge of multi-layered tropical cloud forest abutting on Dracaena plantation.			2010-03-11	D. H. Norris
Liverwort	UC2053938	11	Plagiochila		Plagiochilaceae	On branch of tree in area of cloud forest.			2010-03-11	D. H. Norris
Liverwort	UC2054013	26	Plagiochila		Plagiochilaceae	In area of cloud forest.			2010-03-11	D. H. Norris
Liverwort	UC2054014	27	Plagiochila		Plagiochilaceae	On stone in area of cloud forest.			2010-03-11	D. H. Norris
Liverwort	UC2054015	28	Plagiochila		Plagiochilaceae	Hanging from tree branch in area of cloud forest.			2010-03-11	D. H. Norris
Liverwort	UC2053824	5	Plagiochila		Plagiochilaceae	On tree in the Nectandra Gardens in cloud forest.			2010-03-11	D. H. Norris
Liverwort	UC2053823	7	Plagiochila		Plagiochilaceae	On tree in the Nectandra Gardens in cloud forest.			2010-03-11	D. H. Norris
Liverwort	UC2053927	17	Plagiochila		Plagiochilaceae	On rock in the Nectandra Gardens in cloud forest.			2010-03-11	D. H. Norris
Liverwort	UC2053822	32	Plagiochila		Plagiochilaceae	On base of tree in the Nectandra Gardens in cloud forest.			2010-03-11	D. H. Norris
Liverwort	UC2053986	2	Plagiochila		Plagiochilaceae	On soil in cloud forest.			2010-03-11	D. H. Norris
Liverwort	UC2053181		Plagiochila		Plagiochilaceae	On sunny fencepost at edge of Ocotea portion of Nectandra Gardens in area of cloud forest			2009-04-23	D. H. Norris
Liverwort	UC2054069	110322A	Plagiochila	aerea	Plagiochilaceae	On moist, diffusely lit large log along Trail "E" in cloud forest			2007-07-05	D. H. Norris
Liverwort	UC2053751	17178	Plagiochila	caduciloba	Plagiochilaceae	On trunk of tree at edge of cloud forest abutting on Dracaena plantation.			2010-03-11	D. H. Norris
Liverwort	UC2053544	110017	Plagiochila		Plagiochilaceae	On moist, diffusely lit stem of liana along Trail "A" in cloud forest on moderate slopes of the watershed of the Quebrada Verde in the Cordillera de TilarÃ¡n along Highway 142 about 15 km north of San Ramon in San Ramon Canton, Angeles District.			2007-07-05	D. H. Norris
Liverwort	UC2053159	110191	Plagiochila	raddiana	Plagiochilaceae	On moist, sunny limbs of shrub at crest of Trail "A" in cloud forest border adjacent to pastured lands on moderate slopes of the watershed of the Quebrada Verde in the Cordillera de TilarÃ¡n along Highway 142 about 15 km north of San Ramon in San Ramon Canton, Angeles District.			2007-07-05	D. H. Norris
Liverwort	UC2053725	17138	Plagiochila	raddiana	Plagiochilaceae	On horizontal stem in cloud forest.			2010-03-11	D. H. Norris
Liverwort	UC2054072	110197A	Plagiochila	rudischusteri	Plagiochilaceae	On moist, sunny fencepost at crest of Trail "A" in cloud forest border adjacent to pastured lands			2007-07-05	D. H. Norris
Liverwort	UC2053187	110836	Plagiochila	rudischusteri	Plagiochilaceae	Pendent from liana along boundary of the Nectandra Reserve at top of Trail "A" in cloud forest.			2009-03-26	D. H. Norris
Liverwort	UC2053169	110942	Plagiochila	rudischusteri	Plagiochilaceae	On moist, diffusely lit bark of tree in open area beyond rope bridge in Nectandra Reserve.			2009-03-26	D. H. Norris
Liverwort	UC2054070	111040E	Plagiochila	rudischusteri	Plagiochilaceae	On bark of large tree in the Nectandra Gardens in area of cloud forest			2009-04-23	D. H. Norris
Liverwort	UC2053720	17129	Plagiochila	rutilans	Plagiochilaceae	On trunk of tree in cloud forest.			2010-03-11	D. H. Norris
Liverwort	UC2053173	110390	Plagiochila	undata	Plagiochilaceae	On moist, shaded branches of shrub overhanging intermittent stream along Trail "C" in cloud forest on moderate slopes of the watershed of the Quebrada Verde in the Cordillera de TilarÃ¡n along Highway 142 about 15 km north of San Ramon in San Ramon Canton, Angeles District.			2007-07-05	D. H. Norris
Liverwort	UC2053775	17210	Plagiochila	vincentina	Plagiochilaceae	On tree near stream at edge of multilayered tropical cloud forest abutting on Dracaena plantation.			2010-03-11	D. H. Norris
Liverwort	UC2053277	110895	Blepharostoma	trichophyllum	Pseudolepicoleaceae	On log in Nectandra Reserve.			2009-03-26	D. H. Norris
Liverwort		110153	Blepharostoma	trichophyllum	Pseudolepicoleaceae	On moist, diffusely lit branches of shrub along Trail "E" in cloud forest on moderate slopes of the watershed of the Quebrada Verde in the Cordillera de TilarÃ¡n along Highway 142 about 15 km north of San Ramon in San Ramon Canton, Angeles District.			2007-07-05	D. H. Norris
Liverwort	UC2053637	2	Temnoma	chaetophylla	Pseudolepicoleaceae	Epixylic mat along trail in Ocotea portion of the nectandra Gardens along Highway 142 in cloud forest			2010-03-11	D. H. Norris
Liverwort		109990 K	Radula		Radulaceae	On moist and shaded large tree along Trail "A" in cloud forest on moderate slopes of the watershed of the Quebrada Verde in the Cordillera de TilarÃ¡n along Highway 142 about 15 km north of San Ramon in San Ramon Canton, Angeles District.			2007-07-05	D. H. Norris
Liverwort		109991 O	Radula		Radulaceae	On moist and shaded leaves of epiphyte along Trail "A" in cloud forest on moderate slopes of the watershed of the Quebrada Verde in the Cordillera de TilarÃ¡n along Highway 142 about 15 km north of San Ramon in San Ramon Canton, Angeles District.			2007-07-05	D. H. Norris
Liverwort		110064	Radula		Radulaceae	On very moist, shaded base of stump along Trail "E" in cloud forest on moderate slopes of the watershed of the Quebrada Verde in the Cordillera de TilarÃ¡n along Highway 142 about 15 km north of San Ramon in San Ramon Canton, Angeles District.			2007-07-05	D. H. Norris
Liverwort		110130	Radula		Radulaceae	On moist, shaded branches of shrub along Trail "E" in cloud forest on moderate slopes of the watershed of the Quebrada Verde in the Cordillera de TilarÃ¡n along Highway 142 about 15 km north of San Ramon in San Ramon Canton, Angeles District.			2007-07-05	D. H. Norris
Liverwort	UC2053337	110184	Radula		Radulaceae	On moist, sunny limbs of shrub at crest of Trail "A" in cloud forest border adjacent to pastured lands on moderate slopes of the watershed of the Quebrada Verde in the Cordillera de TilarÃ¡n along Highway 142 about 15 km north of San Ramon in San Ramon Canton, Angeles District.			2007-07-05	D. H. Norris
Liverwort	UC2054049	110229A	Radula		Radulaceae	On moist, sunny fencepost at crest of Trail "A" in cloud forest border			2007-07-05	D. H. Norris
Liverwort	UC2054048	110235 A	Radula		Radulaceae	On moist, sunny fencepost at crest of Trail "A" in cloud forest border adjacent to pastured lands			2007-07-05	D. H. Norris
Liverwort	UC2054046	110248A	Radula		Radulaceae	On very moist, shaded branch of shrub at crest of Trail "A" in cloud forest border adjacent to pastured lands			2007-07-05	D. H. Norris
Liverwort	UC2053339	110249	Radula		Radulaceae	On very moist, shaded branch of shrub at crest of Trail "A" in cloud forest border adjacent to pastured lands on moderate slopes of the watershed of the Quebrada Verde in the Cordillera de TilarÃ¡n along Highway 142 about 15 km north of San Ramon in San Ramon Canton, Angeles District.			2007-07-05	D. H. Norris
Liverwort	UC2053334	110310	Radula		Radulaceae	On moist, shaded rock along Trail "E" in cloud forest on moderate slopes of the watershed of the Quebrada Verde in the Cordillera de TilarÃ¡n along Highway 142 about 15 km north of San Ramon in San Ramon Canton, Angeles District.			2007-07-05	D. H. Norris
Liverwort	UC2053336	110827	Radula		Radulaceae	On tree fern near entrance to the Nectandra Reserve in cloud forest			2009-03-26	D. H. Norris
Liverwort	UC2054021	110901B	Radula		Radulaceae	Pendent from small sapling in Nectandra reserve			2007-07-05	D. H. Norris
Liverwort	UC2053333	110908	Radula		Radulaceae	Pendent from vine over creek at Bridge in Nectandra Reserve.			2009-03-26	D. H. Norris
Liverwort	UC2053335	111085	Radula		Radulaceae	On bark of tree in the Nectandra Gardems in area of cloud forest			2009-04-23	D. H. Norris
Liverwort	UC2053340	111235	Radula		Radulaceae	On log in area of cloud forest			2010-03-11	D. H. Norris
Liverwort	UC2053332	111264	Radula		Radulaceae	On small branches of shrub near waterline of small stream along trail "E" of Nectandra Gardens near rope bridge in are of cloud forest			2010-03-11	D. H. Norris
Liverwort	UC2053735	17155	Radula		Radulaceae	On trunk of small tree by trail in cloud forest.			2010-03-11	Allen Risk
Liverwort	UC2053760	17190	Radula		Radulaceae	On boulder in stream at edge of multi-layered tropical cloud forest abutting on Dracaena plantation.			2010-03-11	Allen Risk
Liverwort	UC2053941	13	Radula		Radulaceae	On stone in area of cloud forest.			2010-03-11	P. Nonkulolu
Liverwort	UC2053942	14	Radula		Radulaceae	In area of cloud forest.			2010-03-11	P. Nonkulolu
Liverwort	UC2053897	10	Radula		Radulaceae	In the Nectandra Gardens in cloud forest.			2010-03-11	D. Lucas
Liverwort	UC2053338	111060	Radula	tenera	Radulaceae	On leaf in the Nectandra Gardens in area of cloud forest			2009-04-23	D. H. Norris
Liverwort	UC2054038	110398B	Trichocolea		Trichocoleaceae	On moist, shaded leaves of shrub along Trail "C" in cloud forest			2007-07-05	D. H. Norris
Liverwort	UC2053349	110874	Trichocolea		Trichocoleaceae	Pendent from small tree in Nectandra Reserve.			2009-03-26	D. H. Norris
Liverwort	UC2053345	110917	Trichocolea		Trichocoleaceae	Epiphyte on small vine along creek at bridge in Nectandra Reserve.			2009-03-26	D. H. Norris
Liverwort	UC2053341	111052	Trichocolea		Trichocoleaceae	On bark of large tree in Necandra Gardens in area of cloud forest			2009-04-23	D. H. Norris
Liverwort	UC2053348	111217	Trichocolea		Trichocoleaceae	On moist, diffusely lit base of tree in area of cloud forest			2010-03-11	D. H. Norris
Liverwort	UC2053680	110000	Trichocolea	filicaulis	Trichocoleaceae	On moist and shaded bark of large tree along Trail "A" in cloud forest on moderate slopes of the watershed of the Quebrada Verde in the Cordillera de TilarÃ¡n along Highway 142 about 15 km north of San Ramon in San Ramon Canton, Angeles District.			2007-07-05	D. H. Norris
Liverwort	UC2053685	110081	Trichocolea	filicaulis	Trichocoleaceae	On moist, shaded bark of tree along Trail "E" in cloud forest on moderate slopes of the watershed of the Quebrada Verde in the Cordillera de TilarÃ¡n along Highway 142 about 15 km north of San Ramon in San Ramon Canton, Angeles District.			2007-07-05	D. H. Norris
Liverwort	UC2054039	110115A	Trichocolea	flaccida	Trichocoleaceae	On moist, shaded twigs of shrub along Trail "E" in cloud forest			2007-07-05	D. H. Norris
Liverwort	UC2053681	109998	Trichocolea	flaccida	Trichocoleaceae	On moist and shaded bark of large tree along Trail "A" in cloud forest on moderate slopes of the watershed of the Quebrada Verde in the Cordillera de TilarÃ¡n along Highway 142 about 15 km north of San Ramon in San Ramon Canton, Angeles District.			2007-07-05	D. H. Norris
Liverwort	UC2053683	110008	Trichocolea	flaccida	Trichocoleaceae	On moist, diffusely lit branches of tree along Trail "A" in cloud forest on moderate slopes of the watershed of the Quebrada Verde in the Cordillera de TilarÃ¡n along Highway 142 about 15 km north of San Ramon in San Ramon Canton, Angeles District.			2007-07-05	D. H. Norris
Liverwort	UC2053686	110107	Trichocolea	flaccida	Trichocoleaceae	On moist, shaded bark of tree along Trail "E" in cloud forest on moderate slopes of the watershed of the Quebrada Verde in the Cordillera de TilarÃ¡n along Highway 142 about 15 km north of San Ramon in San Ramon Canton, Angeles District.			2007-07-05	D. H. Norris
Liverwort		110119	Trichocolea	flaccida	Trichocoleaceae	Pendent from moist, shaded branches of shrub along Trail "E" in cloud forest on moderate slopes of the watershed of the Quebrada Verde in the Cordillera de TilarÃ¡n along Highway 142 about 15 km north of San Ramon in San Ramon Canton, Angeles District.			2007-07-05	D. H. Norris
Liverwort	UC2053778	5706	Trichocolea	flaccida	Trichocoleaceae	In forest near headquarters of the Nectandra Gardens.			2010-03-11	D. H. Norris
Liverwort	UC2053687	110016	Trichocolea	floccosa	Trichocoleaceae	On moist, diffusely lit dead branches of tree along Trail "A" in cloud forest on moderate slopes of the watershed of the Quebrada Verde in the Cordillera de TilarÃ¡n along Highway 142 about 15 km north of San Ramon in San Ramon Canton, Angeles District.			2007-07-05	D. H. Norris
Liverwort	UC2053688	110085	Trichocolea	floccosa	Trichocoleaceae	On moist, shaded trunk of tree fern along Trail "E" in cloud forest on moderate slopes of the watershed of the Quebrada Verde in the Cordillera de TilarÃ¡n along Highway 142 about 15 km north of San Ramon in San Ramon Canton, Angeles District.			2007-07-05	D. H. Norris
Liverwort	UC2053343	110314	Trichocolea	floccosa	Trichocoleaceae	On moist, shaded vine along Trail "E" in cloud forest on moderate slopes of the watershed of the Quebrada Verde in the Cordillera de TilarÃ¡n along Highway 142 about 15 km north of San Ramon in San Ramon Canton, Angeles District.			2007-07-05	D. H. Norris
Liverwort	UC2053344	110315	Trichocolea	floccosa	Trichocoleaceae	On moist, shaded bark of small tree along Trail "E" in cloud forest on moderate slopes of the watershed of the Quebrada Verde in the Cordillera de TilarÃ¡n along Highway 142 about 15 km north of San Ramon in San Ramon Canton, Angeles District.			2007-07-05	D. H. Norris
Liverwort	UC2053878	110873	Trichocolea	floccosa	Trichocoleaceae	Pendent from liana in Nectandra Reserve			2009-03-26	D. H. Norris
Liverwort	UC2053947	32	Trichocolea	floccosa	Trichocoleaceae	In area of cloud forest.			2010-03-11	D. H. Norris
Liverwort	UC2053915	25	Trichocolea	floccosa	Trichocoleaceae	On rock in the Nectandra Gardens in cloud forest.			2010-03-11	D. H. Norris
Liverwort	UC2053917	46	Trichocolea	floccosa	Trichocoleaceae	On tree near laboratory in the Nectandra Gardens in cloud forest.			2010-03-11	D. H. Norris
Liverwort	UC2053684	110113	Trichocolea	sprucei	Trichocoleaceae	Pendent from moist, shaded twigs of shrub along Trail "E" in cloud forest on moderate slopes of the watershed of the Quebrada Verde in the Cordillera de TilarÃ¡n along Highway 142 about 15 km north of San Ramon in San Ramon Canton, Angeles District.			2007-07-05	D. H. Norris
Liverwort	UC2053682	109948	Trichocolea	tomentella	Trichocoleaceae	On trunk of tree fern in cloud forest along road near entrance gate to Nectandra Garden on moderate slopes of the watershed of the Quebrada Verde in the Cordillera de TilarÃ¡n along Highway 142 about 15 km north of San Ramon in San Ramon Canton, Angeles District.			2007-07-05	D. H. Norris
Liverwort		110145 K	Trichocolea	tomentella	Trichocoleaceae	On moist, shaded leaf of Araceae along trail "E" in cloud forest			2007-07-05	D. H. Norris
Liverwort	UC2053342	110222	Trichocolea	tomentella	Trichocoleaceae	On moist, sunny fencepost at crest of Trail "A" in cloud forest border adjacent to pastured lands on moderate slopes of the watershed of the Quebrada Verde			2007-07-05	D. H. Norris
Liverwort	UC2053346	110838	Trichocolea	tomentella	Trichocoleaceae	On moist, diffusely lit bark of tree along boundary of the Nectandra Reserve at top of Trail "A" in cloud forest.			2009-03-26	D. H. Norris
Liverwort	UC2053902	111057A	Trichocolea	tomentella	Trichocoleaceae	On bark of large tree in the Nectandra Gardens in area of cloud forest.			2009-03-26	D. H. Norris
Liverwort	UC2053737	17158	Trichocolea	tomentella	Trichocoleaceae	On liana in cloud forest.			2010-03-11	D. H. Norris
Liverwort	UC2053350	110584	Trichocolea	tomentosa	Trichocoleaceae	On moist, shaded trunk of Cyathea in cloud forest along Trail "E" on moderate slopes of the watershed of the Quebrada Verde in the Cordillera de TilarÃ¡n at Nectandra Gardens along Highway 142 about 15 km north of San Ramon in San Ramon Canton, Angeles District.			2007-07-05	D. H. Norris
Liverwort	UC2053948	33	Trichocolea	tomentosa	Trichocoleaceae	On stone near headquarters of the Nectandra Gardens.			2010-03-11	P. Nonkulolu
Liverwort	UC2053916	26	Trichocolea	tomentosa	Trichocoleaceae	On rock in the Nectandra Gardens in cloud forest.			2010-03-11	D. Lucas
Moss	UC2053583	110055	Breutelia	chrysea	Bartramiaceae	Beside creek near headquarters of Nectandra Garden on moderate slopes of the watershed of the Quebrada Verde in the Cordillera de TilarÃ¡n along Highway 142 about 15 km north of San Ramon in San Ramon Canton, Angeles District.			2007-07-05	D. H. Norris
Moss	UC2053794	5721	Breutelia	chrysea	Bartramiaceae	In hummocks on soil in Nectandra Gardens.			2010-03-15	D. H. Norris
Moss	UC2053414	111006	Breutelia	inclinata	Bartramiaceae	On moist, diffusely lit soil in the Nectandra Gardens in area of cloud forest.			2009-04-23	D. H. Norris
Moss	UC2053605	110530	Breutelia	subarcuata	Bartramiaceae	On moist, diffusely lit soil beside trail in cloud forest along Trail "E" on moderate slopes of the watershed of the Quebrada Verde in the Cordillera de TilarÃ¡n at Nectandra Gardens along Highway 142 about 15 km north of San Ramon in San Ramon Canton, Angeles District.			2007-07-05	D. H. Norris
Moss	UC2053413	110357	Breutelia	tomentosa	Bartramiaceae	On moist, diffusely lit boulder along Trail "C" in cloud forest on moderate slopes of the watershed of the Quebrada Verde in the Cordillera de TilarÃ¡n along Highway 142 about 15 km north of San Ramon in San Ramon Canton, Angeles District.			2007-07-05	D. H. Norris
Moss	UC2053412	110469	Breutelia	tomentosa	Bartramiaceae	On moist, sunny soil along highway at edge of cloud forest on moderate slopes of the watershed of the Quebrada Verde in the Cordillera de TilarÃ¡n at entrance to Nectandra Gardens along Highway 142 about 15 km north of San Ramon in San Ramon Canton, Angeles District.			2007-07-05	D. H. Norris
Moss		110528	Breutelia	tomentosa	Bartramiaceae	On moist, diffusely lit rock wall in cloud forest on moderate slopes of the watershed of the Quebrada Verde in the Cordillera de TilarÃ¡n near headquarters of Nectandra Gardens along Highway 142 about 15 km north of San Ramon in San Ramon Canton, Angeles District.			2007-07-05	D. H. Norris
Moss	UC2053744	17170	Breutelia	tomentosa	Bartramiaceae	On trunk of tree at edge of cloud forest abutting on Dracaena plantation.			2010-03-11	D. H. Norris
Moss	UC2053894	51	Breutelia	tomentosa	Bartramiaceae	On leaf in laboratory in cloud forest.			2010-03-11	D. H. Norris
Moss	UC2053991	4	Breutelia	tomentosa	Bartramiaceae	On soil in cloud forest.			2010-03-11	D. H. Norris
Moss	UC2053415	110403	Leiomela	bartramioides	Bartramiaceae	On moist, shaded trunk of Alsophila along Trail "C" in cloud forest on moderate slopes of the watershed of the Quebrada Verde in the Cordillera de TilarÃ¡n along Highway 142 about 15 km north of San Ramon in San Ramon Canton, Angeles District.			2007-07-05	D. H. Norris
Moss	UC2053418	110500	Leiomela	bartramioides	Bartramiaceae	On moist, sunny trunk of tree fern at edge of cloud forest on moderate slopes of the watershed of the Quebrada Verde in the Cordillera de TilarÃ¡n at entrance to Nectandra Gardens along Highway 142 about 15 km north of San Ramon in San Ramon Canton, Angeles District.			2007-07-05	D. H. Norris
Moss	UC2053417	110825	Leiomela	bartramioides	Bartramiaceae	On tree fern near entrance to the Nectandra Reserve in cloud forest			2009-03-26	D. H. Norris
Moss	UC2053423	111215	Philonotis		Bartramiaceae	On moist, diffusely lit base of tree in area of cloud forest			2010-03-11	D. H. Norris
Moss	UC2053422	110358	Philonotis	hastata	Bartramiaceae	On moist, diffusely lit stump of tree boulder along Trail "C" in cloud forest on moderate slopes of the watershed of the Quebrada Verde in the Cordillera de TilarÃ¡n along Highway 142 about 15 km north of San Ramon in San Ramon Canton, Angeles District.			2007-07-05	D. H. Norris
Moss	UC2053419	110429	Philonotis	hastata	Bartramiaceae	On moist, shaded leaves of shrub along Trail "C" in cloud forest on moderate slopes of the watershed of the Quebrada Verde in the Cordillera de TilarÃ¡n along Highway 142 about 15 km north of San Ramon in San Ramon Canton, Angeles District.			2007-07-05	D. H. Norris
Moss	UC2053420	110298	Philonotis	uncinata	Bartramiaceae	On moist, sunny soil in trail at crest of Trail "A" in cloud forest border adjacent to pastured lands on moderate slopes of the watershed of the Quebrada Verde in the Cordillera de TilarÃ¡n along Highway 142 about 15 km north of San Ramon in San Ramon Canton, Angeles District.			2007-07-05	D. H. Norris
Moss	UC2053421	110468	Philonotis	uncinata	Bartramiaceae	On moist, sunny soil along highway at edge of cloud forest on moderate slopes of the watershed of the Quebrada Verde in the Cordillera de TilarÃ¡n at entrance to Nectandra Gardens along Highway 142 about 15 km north of San Ramon in San Ramon Canton, Angeles District.			2007-07-05	D. H. Norris
Moss	UC2053584	111199	Philonotis	uncinata	Bartramiaceae	On dry, sunny soil of roadbank area of cloud forest.			2010-03-11	D. H. Norris
Moss	UC2053582	111200	Philonotis	uncinata	Bartramiaceae				2010-03-11	D. H. Norris
Moss		109967	Philonotis	uncinata	Bartramiaceae	On creosote of roadway in cloud forest along road near entrance gate to Nectandra Garden on moderate slopes of the watershed of the Quebrada Verde in the Cordillera de TilarÃ¡n along Highway 142 about 15 km north of San Ramon in San Ramon Canton, Angeles District.			2007-07-05	D. H. Norris
Moss	UC2053594	110497	Brachythecium		Brachytheciaceae	On moist, shaded bark of tree at edge of cloud forest on moderate slopes of the watershed of the Quebrada Verde in the Cordillera de TilarÃ¡n at entrance to Nectandra Gardens along Highway 142 about 15 km north of San Ramon in San Ramon Canton, Angeles District.			2007-07-05	D. H. Norris
Moss		110114 A	Lindigia		Brachytheciaceae	On moist, shaded leaves of shrub along Trail "E" in cloud forest on moderate slopes of the watershed of the Quebrada Verde in the Cordillera de TilarÃ¡n along Highway 142 about 15 km north of San Ramon in San Ramon Canton, Angeles District.			2007-07-05	D. H. Norris
Moss	UC2053808	58	Rhynchostegium		Brachytheciaceae	On bark of tree in creek near headquarters of the Nectandra Gardens.			2010-03-11	Freddy Castillo
Moss	UC2053809	59	Rhynchostegium		Brachytheciaceae	On bark of tree in creek near headquarters of the Nectandra Gardens.			2010-03-11	Freddy Castillo
Moss		110145 L	Rhynchostegium	scariosum	Brachytheciaceae	On moist, shaded leaf of Araceae along Trail "E" in cloud forest			2007-07-05	D. H. Norris
Moss	UC2053397	110521	Rhynchostegium	scariosum	Brachytheciaceae	On very moist, diffusely lit cement of walkway in cloud forest on moderate slopes of the watershed of the Quebrada Verde in the Cordillera de TilarÃ¡n near headquarters of Nectandra Gardens along Highway 142 about 15 km north of San Ramon in San Ramon Canton, Angeles District.			2007-07-05	D. H. Norris
Moss	UC2053581	111198	Rhynchostegium	scariosum	Brachytheciaceae	On bark of tree in area of cloud forest.			2010-03-11	D. H. Norris
Moss	UC2053708	110473	Anomobryum	julaceum	Bryaceae	On moist, sunny boulder along highway at edge of cloud forest on moderate slopes of the watershed of the Quebrada Verde in the Cordillera de TilarÃ¡n at entrance to Nectandra Gardens along Highway 142 about 15 km north of San Ramon in San Ramon Canton, Angeles District.			2007-07-05	D. H. Norris
Moss	UC2053707	110293	Brachymenium		Bryaceae	On moist, diffusely lit fencepost in small creek at crest of Trail "A" in cloud forest border adjacent to pastured lands on moderate slopes of the watershed of the Quebrada Verde in the Cordillera de TilarÃ¡n along Highway 142 about 15 km north of San Ramon in San Ramon Canton, Angeles District.			2007-07-05	D. H. Norris
Moss	UC2053490	111226	Bryum		Bryaceae	In crack in boulder at high way in area of cloud forest			2010-03-11	D. H. Norris
Moss	UC2053491	111232	Pohlia		Bryaceae	On log in area of cloud forest			2010-03-11	D. H. Norris
Moss	UC2053521	110561	Calymperes	nicaraguense	Calymperaceae Kindb.	On moist, shaded small vine in cloud forest along Trail "E" on moderate slopes of the watershed of the Quebrada Verde in the Cordillera de TilarÃ¡n at Nectandra Gardens along Highway 142 about 15 km north of San Ramon in San Ramon Canton, Angeles District.			2007-07-05	D. H. Norris
Moss	UC2053520	111009	Calymperes		Calymperaceae Kindb	On bark of tree in the Nectandra Gardens in area of cloud forest.			23 April- 7 May 2009	D. H. Norris
Moss	UC2053710	110089	Syrrhopodon	berteroanus	Calymperaceae Kindb	On very moist, shaded buttress of large tree fern along Trail "E" in cloud forest on moderate slopes of the watershed of the Quebrada Verde in the Cordillera de TilarÃ¡n along Highway 142 about 15 km north of San Ramon in San Ramon Canton, Angeles District.			2007-07-05	D. H. Norris
Moss	UC2053715	110124	Syrrhopodon	berteroanus	Calymperaceae Kindb	Pendent from moist, shaded branches of shrub along Trail "E" in cloud forest on moderate slopes of the watershed of the Quebrada Verde in the Cordillera de TilarÃ¡n along Highway 142 about 15 km north of San Ramon in San Ramon Canton, Angeles District.			2007-07-05	D. H. Norris
Moss	UC2053754	17183	Syrrhopodon	incompletus	Calymperaceae Kindb.	On trunk of tree at edge of cloud forest abutting on Dracaena plantation.			2010-03-11	Allen Risk
Moss	UC2053774	17209	Syrrhopodon	incompletus	Calymperaceae Kindb.	On tree near stream at edge of multilayered tropical cloud forest abutting on Dracaena plantation.			2010-03-11	Allen Risk
Moss	UC2053756	17185	Syrrhopodon	leprieurii	Calymperaceae Kindb.	On trunk of tree at edge of cloud forest abutting on Dracaena plantation.			2010-03-11	Allen Risk
Moss	UC2053985	1	Syrrhopodon	lycopodioides	Calymperaceae Kindb.	On soil in cloud forest.			2010-03-11	Frida Rosengren
Moss	UC2053509	111089	Syrrhopodon	lycopodioides	Calymperaceae Kindb	On bark of tree in the Nectandra Gardens in area of cloud forest			2009-04-23	D. H. Norris
Moss	UC2053869	110396A	Syrrhopodon	lycopodioides	Calymperaceae Kindb	On moist, shaded twigs of recently fallen tree along intermittent stream along Trail "C" in cloud forest			2007-07-05	D. H. Norris
Moss	UC2053514	111043	Syrrhopodon	lycopodioides	Calymperaceae Kindb	On bar of large tree in the Nectandra Gardens in area of cloud forest			2009-04-23	D. H. Norris
Moss	UC2053519	111083	Syrrhopodon	lycopodioides	Calymperaceae Kindb	On twigs of shrub in the Nectandra Gardens in area of cloud forest			2009-04-23	D. H. Norris
Moss	UC1943907	109949	Syrrhopodon	lycopodioides	Calymperaceae Kindb	On trunk of tree fern in cloud forest along road near entrance gate to Nectandra Garden on moderate slopes of the watershed of the Quebrada Verde in the Cordillera de TilarÃ¡n along Highway 142 about 15 km north of San Ramon in San Ramon Canton, Angeles District.			2007-07-05	D. H. Norris
Moss	UC2053507	110523	Syrrhopodon	lycopodioides	Calymperaceae Kindb	On moist, diffusely lit trunk of Alsophila in cloud forest on moderate slopes of the watershed of the Quebrada Verde in the Cordillera de TilarÃ¡n near headquarters of Nectandra Gardens along Highway 142 about 15 km north of San Ramon in San Ramon Canton, Angeles District.			2007-07-05	D. H. Norris
Moss		109991 N	Syrrhopodon	prolifer	Calymperaceae Kindb.	On moist and shaded leaves of epiphyte along Trail "A" in cloud forest on moderate slopes of the watershed of the Quebrada Verde in the Cordillera de TilarÃ¡n along Highway 142 about 15 km north of San Ramon in San Ramon Canton, Angeles District.			2007-07-05	D. H. Norris
Moss	UC2053712	110015	Syrrhopodon	prolifer	Calymperaceae Kindb	On moist, diffusely lit dead branches of tree along Trail "A" in cloud forest on moderate slopes of the watershed of the Quebrada Verde in the Cordillera de TilarÃ¡n along Highway 142 about 15 km north of San Ramon in San Ramon Canton, Angeles District.			2007-07-05	D. H. Norris
Moss	UC2053713	110090	Syrrhopodon	prolifer	Calymperaceae Kindb	On very moist, shaded buttress of large tree fern along Trail "E" in cloud forest on moderate slopes of the watershed of the Quebrada Verde in the Cordillera de TilarÃ¡n along Highway 142 about 15 km north of San Ramon in San Ramon Canton, Angeles District.			2007-07-05	D. H. Norris
Moss	UC2053510	110434	Syrrhopodon	prolifer	Calymperaceae Kindb	On moist, shaded tree along Trail "C" in cloud forest on moderate slopes of the watershed of the Quebrada Verde in the Cordillera de TilarÃ¡n along Highway 142 about 15 km north of San Ramon in San Ramon Canton, Angeles District.			2007-07-05	D. H. Norris
Moss	UC2053513	110461	Syrrhopodon	prolifer	Calymperaceae Kindb	On moist, rather shaded trunk of tree fern at edge of cloud forest on moderate slopes of the watershed of the Quebrada Verde in the Cordillera de TilarÃ¡n at entrance to Nectandra Gardens along Highway 142 about 15 km north of San Ramon in San Ramon Canton, Angeles District.			2007-07-05	D. H. Norris
Moss	UC2053511	110566	Syrrhopodon	prolifer	Calymperaceae Kindb	On moist, shaded stem of vine in cloud forest along Trail "E" on moderate slopes of the watershed of the Quebrada Verde in the Cordillera de TilarÃ¡n at Nectandra Gardens along Highway 142 about 15 km north of San Ramon in San Ramon Canton, Angeles District.			2007-07-05	D. H. Norris
Moss	UC2053512	110574	Syrrhopodon	prolifer	Calymperaceae Kindb	On moist, shaded bark of tree in cloud forest along Trail "E" on moderate slopes of the watershed of the Quebrada Verde in the Cordillera de TilarÃ¡n at Nectandra Gardens along Highway 142 about 15 km north of San Ramon in San Ramon Canton, Angeles District.			2007-07-05	D. H. Norris
Moss	UC2053714	110585	Syrrhopodon	prolifer	Calymperaceae Kindb	On moist, shaded log of Cyathea in cloud forest along Trail "E" on moderate slopes of the watershed of the Quebrada Verde in the Cordillera de TilarÃ¡n at Nectandra Gardens along Highway 142 about 15 km north of San Ramon in San Ramon Canton, Angeles District.			2007-07-05	D. H. Norris
Moss	UC2053515	110894	Syrrhopodon	prolifer	Calymperaceae Kindb	On log in Nectandra Reserve.			2009-03-26	D. H. Norris
Moss	UC2053730	17147	Syrrhopodon	prolifer	Calymperaceae Kindb.	On log in cloud forest.			2010-03-11	Allen Risk
Moss	UC2053731	17148	Syrrhopodon	prolifer	Calymperaceae Kindb.	On bark of tree in cloud forest.			2010-03-11	Allen Risk
Moss	UC2053954	1	Syrrhopodon	prolifer	Calymperaceae Kindb.	On trunk of /Alsophila imrayana/ along E Trail in the Nectandra Reserve in area of cloud forest			2010-03-11	Mike Tessler
Moss	UC2053516	111203	Syrrhopodon		Calymperaceae Kindb	On moist, diffusely it base of tree in area of cloud forest			2010-03-11	D. H. Norris
Moss	UC2053508	111221	Syrrhopodon		Calymperaceae Kindb	On moist, diffusellyu lit base of tree in area of cloud forest			2010-03-11	D. H. Norris
Moss	UC2053518	111244	Syrrhopodon		Calymperaceae Kindb	On trunk of tree along Trail "A" of Nectandra gardens in area of cloud forest			2010-03-11	D. H. Norris
Moss	UC2054008	22	Syrrhopodon		Calymperaceae Kindb.	In Nectandra Gardens in cloud forest.			2010-03-11	P. Nonkulolu
Moss	UC2053711	110829	Syrrhopodon	tenuifolius	Calymperaceae Kindb.	On fence post along boundary of the Nectandra Reserve at top of Trail "A" in cloud forest.			2009-03-26	D. H. Norris
Moss	UC2053522	110879	Syrrhopodon	lycopodioides	Calymperaceae Kindb.	Log newly fallen from canopy in Nectandra Reserve.			2009-03-26	D. H. Norris
Moss	UC2053370	111262	Daltonia		Daltoniaceae Schimp.	On small branches of shrub near waterline of small stream along Trail "E" of Nectandra Gardens near rope bridge in area of cloud forest			2010-03-11	D. H. Norris
Moss	UC2053934	7	Daltonia		Daltoniaceae Schimp	On twigs in area of cloud forest.			2010-03-11	P. Nonkulolu
Moss	UC2053752	17180	Daltonia	splachnoides	Daltoniaceae Schimp	On trunk of tree at edge of cloud forest abutting on Dracaena plantation.			2010-03-11	Allen Risk
Moss	UC2053374	110919	Leskeodon		Daltoniaceae Schimp.	On trunk of Alsophila along creek at bridge in Nectandra Reserve.			2009-03-26	D. H. Norris
Moss	UC2053375	111260	Leskeodon		Daltoniaceae Schimp.	On small branches of shrub near water line of small stream along Trail "E" of Nectandra Gardens near rope bridge in area of cloud forest			2010-03-11	D. H. Norris
Moss	UC2053777	17160	Leskeodon		Daltoniaceae Schimp	On trunk of tree fern in cloud forest.			2010-03-11	Allen Risk
Moss		110134B	Leskeodon	andicola	Daltoniaceae Schimp	Pendent from moist, shaded branches of shrub along Trail "E" in cloud forest on moderate slopes of the watershed of the Quebrada Verde in the Cordillera de TilarÃ¡n along Highway 142 about 15 km north of San Ramon in San Ramon Canton, Angeles District.			2007-07-05	D. H. Norris
Moss	UC2053548	109979	Leskeodon	auratus	Daltoniaceae Schimp.	On moist and shaded stones along Trail "A" in cloud forest on moderate slopes of the watershed of the Quebrada Verde in the Cordillera de TilarÃ¡n along Highway 142 about 15 km north of San Ramon in San Ramon Canton, Angeles District.			2007-07-05	D. H. Norris
Moss	UC2053377	110399	Leskeodon	auratus	Daltoniaceae Schimp.	On moist, shaded trunk of Alsophila along Trail "C" in cloud forest on moderate slopes of the watershed of the Quebrada Verde in the Cordillera de TilarÃ¡n along Highway 142 about 15 km north of San Ramon in San Ramon Canton, Angeles District.			2007-07-05	D. H. Norris
Moss		109978	Leskeodon	auratus	Daltoniaceae Schimp.	On moist and shaded stones along Trail "A" in cloud forest on moderate slopes of the watershed of the Quebrada Verde in the Cordillera de TilarÃ¡n along Highway 142 about 15 km north of San Ramon in San Ramon Canton, Angeles District.			2007-07-05	D. H. Norris
Moss	UC2053724	17135	Leskeodon	cubensis	Daltoniaceae Schimp	On trunk of tree in cloud forest.			2010-03-11	Allen Risk
Moss	UC2053740	17166	Leskeodon	cubensis	Daltoniaceae Schimp	On small, dead twig in cloud forest.			2010-03-11	Allen Risk
Moss	UC2053373	110311	Leskeodon	cubensis	Daltoniaceae Schimp.	On moist, shaded trunk of Alsophila along Trail "E" in cloud forest on moderate slopes of the watershed of the Quebrada Verde in the Cordillera de TilarÃ¡n along Highway 142 about 15 km north of San Ramon in San Ramon Canton, Angeles District.			2007-07-05	D. H. Norris
Moss	UC2053376	110538	Leskeodon	cubensis	Daltoniaceae Schimp.	On moist, shaded trunk of Alsophila in cloud forest along Trail "E" on moderate slopes of the watershed of the Quebrada Verde in the Cordillera de TilarÃ¡n at Nectandra Gardens along Highway 142 about 15 km north of San Ramon in San Ramon Canton, Angeles District.			2007-07-05	D. H. Norris
Moss	UC2053885	110425	Leskeodon	pusillus	Daltoniaceae Schimp.	On moist, shaded log along Trail "C" in cloud forest on moderate slopes of the watershed of the Quebrada Verde in the Cordillera de TilarÃ¡n along Highway 142 about 15 km north of San Ramon in San Ramon Canton, Angeles District.			2007-07-05	D. H. Norris
Moss	UC1944223	110079	Lepidopilum		Daltoniaceae Schimp.	On very moist to submerged, diffusely lit rounded boulder in stream along Trail "E" in cloud forest on moderate slopes of the watershed of the Quebrada Verde in the Cordillera de TilarÃ¡n along Highway 142 about 15 km north of San Ramon in San Ramon Canton, Angeles District.			2007-07-05	D. H. Norris
Moss	UC2053618	110863	Lepidopilum		Daltoniaceae Schimp.	Pendant from small shrub with cordate leaves in canyon near entrance to the Nectandra Reserve where the small stream crosses the highway in cloud forest.			2009-03-26	D. H. Norris
Moss	UC2053388	110915	Lepidopilum		Daltoniaceae Schimp.	On rocks in estero at bridge in Nectandra Reserve.			2009-03-26	D. H. Norris
Moss		110065I	Lepidopilum		Daltoniaceae Schimp.	On very moist, diffusely lit leaf of palm along Trail "E" in cloud forest on moderate slopes of the watershed of the Quebrada Verde in the Cordillera de TilarÃ¡n along Highway 142 about 15 km north of San Ramon in San Ramon Canton, Angeles District.			2007-07-05	D. H. Norris
Moss	UC2053256	111230	Lepidopilum	brevipes	Daltoniaceae Schimp.	On log in area of cloud forest			2010-03-11	D. H. Norris
Moss	UC2053360	110332	Lepidopilum	muelleri	Daltoniaceae Schimp.	On moist, shaded stones along Trail "E" in cloud forest on moderate slopes of the watershed of the Quebrada Verde in the Cordillera de TilarÃ¡n along Highway 142 about 15 km north of San Ramon in San Ramon Canton, Angeles District.			2007-07-05	D. H. Norris
Moss	UC2053768	17198	Lepidopilum	muelleri	Daltoniaceae Schimp.	On twig overarching stream at edge of multi-layered tropical cloud forest abutting on Dracaena plantation.			2010-03-11	Allen Risk
Moss	UC2053363	110457	Lepidopilum	scabrisetum	Daltoniaceae Schimp.	On very moist, diffusely lit trunk of tree fern at edge of cloud forest on moderate slopes of the watershed of the Quebrada Verde in the Cordillera de TilarÃ¡n at entrance to Nectandra Gardens along Highway 142 about 15 km north of San Ramon in San Ramon Canton, Angeles District.			2007-07-05	D. H. Norris
Moss		110145 M	Lepidopilum	surinamense	Daltoniaceae Schimp.	On moist, shaded leaf of Araceae along Trail "E" in cloud forest			2007-07-05	D. H. Norris
Moss	UC2053505	110201	Atractylocarpus		Dicranaceae	On moist, diffusely lit soil at edge of clearing at crest of Trail "A" in cloud forest border adjacent to pastured lands on moderate slopes of the watershed of the Quebrada Verde in the Cordillera de Tilarán along Highway 142 about 15 km north of San Ramon in San Ramon Canton, Angeles District.			2007-07-05	D. H. Norris
Moss	UC2054083	110237B	Campylopus	arctocarpus	Dicranaceae	On moist, sunny fencepost at crest of Trail "A" in cloud forest border			2007-07-05	D. H. Norris
Moss	UC2053872	111093C	Campylopus	arctocarpus	Dicranaceae	On sunny fencepost at edge of Ocotea portion of Nectandra Gardens in area of cloud forest			2007-07-05	D. H. Norris
Moss	UC2053717	110025	Campylopus	arctocarpus	Dicranaceae	On stems of shrub along Trail "A" in cloud forest on moderate slopes of the watershed of the Quebrada Verde in the Cordillera de TilarÃ¡n along Highway 142 about 15 km north of San Ramon in San Ramon Canton, Angeles District.			2007-07-05	D. H. Norris
Moss	UC2053716	110034	Campylopus	arctocarpus	Dicranaceae	On moist, sunny bark of isolated tree at crest of Trail "A" in cloud forest border adjacent to pastured lands on moderate slopes of the watershed of the Quebrada Verde in the Cordillera de TilarÃ¡n along Highway 142 about 15 km north of San Ramon in San Ramon Canton, Angeles District.			2007-07-05	D. H. Norris
Moss	UC2053718	110053	Campylopus	arctocarpus	Dicranaceae	On asphalt of driveway in cloud forest near entrance gate to Nectandra Garden on moderate slopes of the watershed of the Quebrada Verde in the Cordillera de TilarÃ¡n along Highway 142 about 15 km north of San Ramon in San Ramon Canton, Angeles District.			2007-07-05	D. H. Norris
Moss	UC2053498	110250	Campylopus	arctocarpus	Dicranaceae	On very moist, shaded branch of shrub at crest of Trail "A" in cloud forest border adjacent to pastured lands on moderate slopes of the watershed of the Quebrada Verde in the Cordillera de TilarÃ¡n along Highway 142 about 15 km north of San Ramon in San Ramon Canton, Angeles District.			2007-07-05	D. H. Norris
Moss	UC2053497	110576	Campylopus	arctocarpus	Dicranaceae	On moist, diffusely lit rocks along trail in cloud forest along Trail "E" on moderate slopes of the watershed of the Quebrada Verde in the Cordillera de TilarÃ¡n at Nectandra Gardens along Highway 142 about 15 km north of San Ramon in San Ramon Canton, Angeles District.			2007-07-05	D. H. Norris
Moss	UC2053495	110897	Campylopus	arctocarpus	Dicranaceae	In canopy of recently fallen tree in Nectandra Reserve.			2009-03-26	D. H. Norris
Moss	UC2053496	110459	Campylopus	savannarum	Dicranaceae	On moist, rather shaded trunk of tree fern at edge of cloud forest on moderate slopes of the watershed of the Quebrada Verde in the Cordillera de TilarÃ¡n at entrance to Nectandra Gardens along Highway 142 about 15 km north of San Ramon in San Ramon Canton, Angeles District.			2007-07-05	D. H. Norris
Moss	UC2053499	110238	Campylopus	tallulensis	Dicranaceae	On moist, diffusely lit base of large and isolated tree at crest of Trail "A" in cloud forest border adjacent to pastured lands on moderate slopes of the watershed of the Quebrada Verde in the Cordillera de TilarÃ¡n along Highway 142 about 15 km north of San Ramon in San Ramon Canton, Angeles District.			2007-07-05	D. H. Norris
Moss	UC2054005	20	Campylopus		Dicranaceae	On soil in the Nectandra Gardens in cloud forest.			2010-03-11	P. Nonkulolu
Moss	UC2053500	110239	Dicranella		Dicranaceae	On moist, diffusely lit soil on root wad of recently fallen tree at crest of Trail "A" in cloud forest border adjacent to pastured lands on moderate slopes of the watershed of the Quebrada Verde			2007-07-05	D. H. Norris
Moss	UC2053805	54	Dicranella		Dicranaceae	On bark of tree in creek near headquarters of the Nectandra Gardens.			2010-03-11	Freddy Castillo
Moss	UC2053806	54	Dicranella		Dicranaceae	On bark of tree in creek near headquarters of the Nectandra Gardens.			2010-03-11	Freddy Castillo
Moss	UC2053796	5723	Dicranum	flagellare	Dicranaceae	On rotten log near stream in Ocotea portion of Nectandra Gardens.			2010-03-15	Dorothy Allard
Moss		110023B	Leucobryum		Dicranaceae	On stems of shrub along Trail "A" in cloud forest on moderate slopes of the watershed of the Quebrada Verde in the Cordillera de TilarÃ¡n along Highway 142 about 15 km north of San Ramon in San Ramon Canton, Angeles District.			2007-07-05	D. H. Norris
Moss	UC2053814	31	Leucobryum	albidum	Dicranaceae	On stump in the Nectandra Gardens in cloud forest.			2010-03-11	D. Lucas
Moss	UC2053372	110401	Leucobryum	crispum	Dicranaceae	On moist, shaded buttress of large tree along intermittent stream along Trail "C" in cloud forest on moderate slopes of the watershed of the Quebrada Verde in the Cordillera de TilarÃ¡n along Highway 142 about 15 km north of San Ramon in San Ramon Canton, Angeles District.			2007-07-05	D. H. Norris
Moss	UC2053371	110406	Leucobryum	crispum	Dicranaceae	On moist, rather shaded boulder along Trail "C" in cloud forest on moderate slopes of the watershed of the Quebrada Verde in the Cordillera de TilarÃ¡n along Highway 142 about 15 km north of San Ramon in San Ramon Canton, Angeles District.			2007-07-05	D. H. Norris
Moss	UC1943908	109946	Leucobryum	giganteum	Dicranaceae	On trunk of tree fern in cloud forest along road near entrance gate to Nectandra Garden on moderate slopes of the watershed of the Quebrada Verde			2007-07-05	D. H. Norris
Moss	UC2053699	110084	Leucobryum	giganteum	Dicranaceae	On moist, shaded trunk of tree fern along Trail "E" in cloud forest on moderate slopes of the watershed of the Quebrada Verde in the Cordillera de TilarÃ¡n along Highway 142 about 15 km north of San Ramon in San Ramon Canton, Angeles District.			2007-07-05	D. H. Norris
Moss		110097	Leucobryum	giganteum	Dicranaceae	On moist, diffusely lit top of large rock in stream along Trail "E" in cloud forest on moderate slopes of the watershed of the Quebrada Verde in the Cordillera de TilarÃ¡n along Highway 142 about 15 km north of San Ramon in San Ramon Canton, Angeles District.			2007-07-05	D. H. Norris
Moss		110236 A	Leucobryum	giganteum	Dicranaceae	On moist, sunny soil along trail at crest of Trail "A" in cloud forest border adjacent to pastured lands on moderate slopes of the watershed of the Quebrada Verde			2007-07-05	D. H. Norris
Moss	UC2053108	110410A	Leucobryum	giganteum	Dicranaceae	On moist, shaded leaves of fern along Trail "C" in cloud forest on moderate slopes of the watershed of the Quebrada Verde in the Cordillera de TilarÃ¡n along Highway 142 about 15 km north of San Ramon in San Ramon Canton, Angeles District.			2007-07-05	D. H. Norris
Moss	UC2053108	110411	Leucobryum	giganteum	Dicranaceae	On moist, shaded boulder along Trail "C" in cloud forest on moderate slopes of the watershed of the Quebrada Verde in the Cordillera de TilarÃ¡n along Highway 142 about 15 km north of San Ramon in San Ramon Canton, Angeles District.			2007-07-05	D. H. Norris
Moss	UC2053107	110458	Leucobryum	giganteum	Dicranaceae	On moist, rather shaded trunk of tree fern at edge of cloud forest on moderate slopes of the watershed of the Quebrada Verde in the Cordillera de TilarÃ¡n at entrance to Nectandra Gardens along Highway 142 about 15 km north of San Ramon in San Ramon Canton, Angeles District.			2007-07-05	D. H. Norris
Moss	UC2053109	110543	Leucobryum	giganteum	Dicranaceae	On moist, shaded small tree in cloud forest along Trail "E" on moderate slopes of the watershed of the Quebrada Verde in the Cordillera de TilarÃ¡n at Nectandra Gardens along Highway 142 about 15 km north of San Ramon in San Ramon Canton, Angeles District.			2007-07-05	D. H. Norris
Moss	UC2053106	111001	Leucobryum	giganteum	Dicranaceae	On bark of tree in the Nectandra Gardens in area of cloud forest.			23 April-May 2009	D. H. Norris
Moss	UC2053721	17130	Leucobryum	martianum	Dicranaceae	On trunk of tree in cloud forest.			2010-03-11	Allen Risk
Moss	UC2053944	15	Leucobryum		Dicranaceae	On trunk of tree in the Nectandra Gardens in cloud forest.			2010-03-11	P. Nonkulolu
Moss	UC2053501	111086	Leucoloma		Dicranaceae	On bark of tree in the Nectandra Gardens in area of cloud forest			2009-04-23	D. H. Norris
Moss		109983	Leucoloma	cruegeriana	Dicranaceae	On moist and shaded small shrub of Psychotria along Trail "A" in cloud forest on moderate slopes of the watershed of the Quebrada Verde in the Cordillera de TilarÃ¡n along Highway 142 about 15 km north of San Ramon in San Ramon Canton, Angeles District.			2007-07-05	D. H. Norris
Moss	UC2053503	110375	Leucoloma	serrulata	Dicranaceae	On moist, shaded boulder along Trail "C" in cloud forest on moderate slopes of the watershed of the Quebrada Verde in the Cordillera de TilarÃ¡n along Highway 142 about 15 km north of San Ramon in San Ramon Canton, Angeles District.			2007-07-05	D. H. Norris
Moss	UC2053502	110945	Leucoloma	serrulata	Dicranaceae	On leaf in open area beyond rope bridge in Nectandra Reserve.			2009-03-26	D. H. Norris
Moss	UC2053929	18	Leucoloma	serrulata	Dicranaceae	On base of tree near laboratory in the Nectandra Gardens in cloud forest.			2010-03-11	D. Lucas
Moss	UC2053504	110283	Microcampylopus	leucogaster	Dicranaceae	On moist, diffusely lit soil in trail at crest of Trail "A" in cloud forest border adjacent to pastured lands on moderate slopes of the watershed of the Quebrada Verde in the Cordillera de TilarÃ¡n along Highway 142 about 15 km north of San Ramon in San Ramon Canton, Angeles District.			2007-07-05	D. H. Norris
Moss	UC2053930	30	Schliephackea	meteorioides	Dicranaceae	Pendent from branches of tree near greenhouse in the Nectandra Gardens in cloud forest.			2010-03-11	D. H. Norris
Moss		110037	Ditrichum		Ditrichaceae	On moist, shaded soil in ditch at crest of Trail "A" in cloud forest border adjacent to pastured lands on moderate slopes of the watershed of the Quebrada Verde in the Cordillera de TilarÃ¡n along Highway 142 about 15 km north of San Ramon in San Ramon Canton, Angeles District.			2007-07-05	D. H. Norris
Moss	UC2053443	110365	Entodon		Entodontaceae	On moist, diffusely lit boulder along Trail "C" in cloud forest on moderate slopes of the watershed of the Quebrada Verde in the Cordillera de TilarÃ¡n along Highway 142 about 15 km north of San Ramon in San Ramon Canton, Angeles District.			2007-07-05	D. H. Norris
Moss	UC2053870	110200A	Fissidens		Fissidentaceae	On moist, diffusely lit soil at edge of clearing at crest of Trail "A" in clou forest border adjacent to pastured lands			2007-07-05	D. H. Norris
Moss	UC2053524	110857	Fissidens		Fissidentaceae	On rocks of overflow dam from small artificial pond near headquarters of the Nectandra Reserve in cloud forest.			2009-03-26	D. H. Norris
Moss	UC2053527	110923	Fissidens		Fissidentaceae	On soil of trail bank along creek at bridge in Nectandra Reserve.			2009-03-26	D. H. Norris
Moss	UC2053763	17193	Fissidens		Fissidentaceae	On boulder in stream at edge of multi-layered tropical cloud forest abutting on Dracaena plantation.			2010-03-11	Allen Risk
Moss	UC2054004	19	Fissidens		Fissidentaceae	On soil in the Nectandra Gardens in cloud forest.			2010-03-11	P. Nonkulolu
Moss	UC2053528		Fissidens		Fissidentaceae	On soil in the Nectandra Garddens in area of cloud forest			2009-04-23	D. H. Norris
Moss	UC2053770	17200	Fissidens	asplenioides	Fissidentaceae	On rock in stream at edge of multi-layered tropical cloud forest abutting on Dracaena plantation.			2010-03-11	Allen Risk
Moss	UC2053523	110868	Fissidens	dubius	Fissidentaceae	On moist to submerged rounded boulder in stream in canyon near entrance to the Nectandra Reserve where small stream crosses the highway in cloud forest.			2009-03-26	D. H. Norris
Moss	UC2053526	110312	Fissidens	rigidulus	Fissidentaceae	On moist, shaded prostrate log of Alsophila along Trail "E" in cloud forest on moderate slopes of the watershed of the Quebrada Verde in the Cordillera de TilarÃ¡n along Highway 142 about 15 km north of San Ramon in San Ramon Canton, Angeles District.			2007-07-05	D. H. Norris
Moss	UC2053727	17143	Fissidens	weirii	Fissidentaceae	Pendent from trunk of tree in cloud forest.			2010-03-11	D. H. Norris
Moss	UC2053866	110199A	Entosthodon	bonplandii	Funariaceae	On moist, diffusely lit soil at edge of clearing at crest of Trail "A" in cloud forest border			2007-07-05	D. H. Norris
Moss		110199	Entosthodon	bonplandii	Funariaceae	On moist, diffusely lit soil at edge of clearing at crest of Trail "A" in cloud forest border adjacent to pastured lands on moderate slopes of the watershed of the Quebrada Verde in the Cordillera de TilarÃ¡n along Highway 142 about 15 km north of San Ramon in San Ramon Canton, Angeles District.			2007-07-05	D. H. Norris
Moss	UC2053494	110234	Entosthodon	bonplandii	Funariaceae	On moist, sunny fencepost at crest of Trail "A" in cloud forest border adjacent to pastured lands on moderate slopes of the watershed of the Quebrada Verde			2007-07-05	D. H. Norris
Moss	UC2053493	110273	Entosthodon	bonplandii	Funariaceae	On moist, sunny soil in trail at crest of Trail "A" in cloud forest border adjacent to pastured lands on moderate slopes of the watershed of the Quebrada Verde in the Cordillera de TilarÃ¡n along Highway 142 about 15 km north of San Ramon in San Ramon Canton, Angeles District.			2007-07-05	D. H. Norris
Moss	UC2053492	110297	Entosthodon	bonplandii	Funariaceae	On moist, sunny soil in trail at crest of Trail "A" in cloud forest border adjacent to pastured lands on moderate slopes of the watershed of the Quebrada Verde in the Cordillera de TilarÃ¡n along Highway 142 about 15 km north of San Ramon in San Ramon Canton, Angeles District.			2007-07-05	D. H. Norris
Moss	UC2054901	110126G	Calyptrochaeta		Hookeriaceae Schimp	On moist, shaded leaves of fern along Trail "E" in cloud forest.			2007-07-05	D. H. Norris
Moss	UC2053657	110462	Calyptrochaeta		Hookeriaceae Schimp	On moist, rather shaded trunk of tree fern at edge of cloud forest on moderate slopes of the watershed of the Quebrada Verde in the Cordillera de TilarÃ¡n at entrance to Nectandra Gardens along Highway 142 about 15 km north of San Ramon in San Ramon Canton, Angeles District.			2007-07-05	D. H. Norris
Moss	UC2053368	110586	Hemiragis	aurea	Hookeriaceae Schimp	On moist, shaded boulder in cloud forest along Trail "E" on moderate slopes of the watershed of the Quebrada Verde in the Cordillera de TilarÃ¡n at Nectandra Gardens along Highway 142 about 15 km north of San Ramon in San Ramon Canton, Angeles District.			2007-07-05	D. H. Norris
Moss	UC2053369	110319	Hookeria		Hookeriaceae Schimp	On moist, shaded rock along Trail "E" in cloud forest on moderate slopes of the watershed of the Quebrada Verde in the Cordillera de TilarÃ¡n along Highway 142 about 15 km north of San Ramon in San Ramon Canton, Angeles District.			2007-07-05	D. H. Norris
Moss	UC2053241	110380	Hookeriopsis		Hookeriaceae Schimp	On moist, shaded leaning trunk of tree along Trail "C" in cloud forest on moderate slopes of the watershed of the Quebrada Verde in the Cordillera de TilarÃ¡n along Highway 142 about 15 km north of San Ramon in San Ramon Canton, Angeles District.			2007-07-05	D. H. Norris
Moss	UC2053867	110199B	Hypnella		Hookeriaceae Schimp	On moist, diffusrely lit soil at edge of clearing at crest of Trail "A" in cloud forest border			2007-07-05	D. H. Norris
Moss	UC2053852	111093D	Hypnella		Hookeriaceae Schimp	On sunny fencepost at edge of Ocotea portion of Nectandra Gardens in area of cloud forest			2009-04-23	D. H. Norris
Moss		110003	Hypnella		Hookeriaceae Schimp	On leaves of shrub along Trail "A" in cloud forest on moderate slopes of the watershed of the Quebrada Verde in the Cordillera de TilarÃ¡n along Highway 142 about 15 km north of San Ramon in San Ramon Canton, Angeles District.			2007-07-05	D. H. Norris
Moss		110134A	Hypnella	diversifolia	Hookeriaceae Schimp	Pendent from moist, shaded branches of shrub along Trail "E" in cloud forest on moderate slopes of the watershed of the Quebrada Verde in the Cordillera de TilarÃ¡n along Highway 142 about 15 km north of San Ramon in San Ramon Canton, Angeles District.			2007-07-05	D. H. Norris
Moss		110145 N	Hypnella	diversifolia	Hookeriaceae Schimp	On moist, shaded leaf of Araceae along Trail "E" in cloud forest on moderate slopes of the watershed of the Quebrada Verde			2007-07-05	D. H. Norris
Moss	UC2054044	110402J	Hypnella	diversifolia	Hookeriaceae Schimp	On moist, shaded leaves of shrub along Trail "C" in cloud forest			2007-07-05	D. H. Norris
Moss	UC2053624	2	Hypnella	diversifolia	Hookeriaceae Schimp	On stone			2010-03-11	P. Nonkulolu
Moss	UC2053270	110906	Hypnella	diversifolia	Hookeriaceae Schimp	On rocks in estero at bridge in Nectandra Reserve.			2009-03-26	D. H. Norris
Moss	UC2053535	111211	Hypnella	diversifolia	Hookeriaceae Schimp	On moist, diffusely lit base of tree in area of cloud forest.			2010-03-11	D. H. Norris
Moss		110035	Hypnella	diversifolia	Hookeriaceae Schimp	On moist, sunny bark of isolated tree at crest of Trail "A" in cloud forest border adjacent to pastured lands on moderate slopes of the watershed of the Quebrada Verde in the Cordillera de TilarÃ¡n along Highway 142 about 15 km north of San Ramon in San Ramon Canton, Angeles District.			2007-07-05	D. H. Norris
Moss		110096	Hypnella	diversifolia	Hookeriaceae Schimp	On moist, diffusely lit top of large rock in stream along Trail "E" in cloud forest on moderate slopes of the watershed of the Quebrada Verde in the Cordillera de TilarÃ¡n along Highway 142 about 15 km north of San Ramon in San Ramon Canton, Angeles District.			2007-07-05	D. H. Norris
Moss	UC2054040	110160 A	Hypnella	diversifolia	Hookeriaceae Schimp	On moist, shaded leaves of shrub along Trail "E" in cloud forest			2007-07-05	D. H. Norris
Moss	UC2053901	110166 E	Hypnella	diversifolia	Hookeriaceae Schimp	On moist, shaded leaf of Araceae along Trail "E" in cloud forest.			2007-07-05	D. H. Norris
Moss	UC2053358	110178	Hypnella	diversifolia	Hookeriaceae Schimp	On moist, sunny limbs of shrub at crest of Trail "A" in cloud forest border adjacent to pastured lands on moderate slopes of the watershed of the Quebrada Verde in the Cordillera de TilarÃ¡n along Highway 142 about 15 km north of San Ramon in San Ramon Canton, Angeles District.			2007-07-05	D. H. Norris
Moss	UC2053378	110240	Hypnella	diversifolia	Hookeriaceae Schimp	On moist, diffusely lit base of large and isolated tree at crest of Trail "A" in cloud forest border adjacent to pastured lands on moderate slopes of the watershed of the Quebrada Verde in the Cordillera de TilarÃ¡n along Highway 142 about 15 km north of San Ramon in San Ramon Canton, Angeles District.			2007-07-05	D. H. Norris
Moss	UC2053384	110268	Hypnella	diversifolia	Hookeriaceae Schimp	On moist, diffusely lit small tree at crest of Trail "A" in cloud forest border adjacent to pastured lands on moderate slopes of the watershed of the Quebrada Verde in the Cordillera de TilarÃ¡n along Highway 142 about 15 km north of San Ramon in San Ramon Canton, Angeles District.			2007-07-05	D. H. Norris
Moss	UC2053886	110032	Hypnella	diversifolia	Hookeriaceae Schimp	On moist, rather sunny limb of tree at crest of Trail "A" in cloud forest border adjacent to pastured lands on moderate slopes of the watershed of the Quebrada Verde in the Cordillera de TilarÃ¡n along Highway 142 about 15 km north of San Ramon in San Ramon Canton, Angeles District.			2007-07-05	D. H. Norris
Moss	UC2053833	110197B	Hypnella	pallescens	Hookeriaceae Schimp	On moist, sunny fencepost at crest of Trail "A" in cloud forest border			2007-07-05	D. H. Norris
Moss		110363	Hypnella	pallescens	Hookeriaceae Schimp	On moist, diffusely lit boulder along Trail "C" in cloud forest on moderate slopes of the watershed of the Quebrada Verde in the Cordillera de TilarÃ¡n along Highway 142 about 15 km north of San Ramon in San Ramon Canton, Angeles District.			2007-07-05	D. H. Norris
Moss	UC2053266	111227	Hypnella	pallescens	Hookeriaceae Schimp	On rather sunny boulder along highway in area of cloud forest			2010-03-11	D. H. Norris
Moss	UC2053242	111258	Rhynchostegiopsis		Hookeriaceae Schimp	On small branches of shrub near waterline of small stram along Trail "E" of Nectandra Gardens near rope bridge in area of cloud forest			2010-03-11	D. H. Norris
Moss	UC2053367	111251	Stenodictyon		Hookeriaceae Schimp	On small branches of shrub near waterline of small stream along Trail "E" of Nectandra gardens near ropes bridge in area of cloud forest			2010-03-17	D. H. Norris
Moss	UC2053366	111254	Stenodictyon		Hookeriaceae Schimp	ON log along small stream along Trail "E" of Nectandra Gardens near rope bridge in area of cloud forest			2010-03-11	D. H. Norris
Moss	UC2053619	109955	Stenodictyon	crosbyi	Hookeriaceae Schimp	On decaying log in cloud forest along road near entrance gate to Nectandra Garden on moderate slopes of the watershed of the Quebrada Verde in the Cordillera de TilarÃ¡n along Highway 142 about 15 km north of San Ramon in San Ramon Canton, Angeles District.			2007-07-05	D. H. Norris
Moss	UC2053743	17169	Stenodictyon	wrightii	Hookeriaceae Schimp	On trunk of tree in cloud forest.			2010-03-11	Allen Risk
Moss	UC2053876	110147A	Chryso-hypnum	diminutivum	Hypnaceae	On moist, shaded log along Trail "E" in cloud forest			2007-07-05	D. H. Norris
Moss	UC2053592	109963	Ectropothecium	leptochaeton	Hypnaceae	On creosote of roadway in cloud forest along road near entrance gate to Nectandra Garden on moderate slopes of the watershed of the Quebrada Verde in the Cordillera de TilarÃ¡n along Highway 142 about 15 km north of San Ramon in San Ramon Canton, Angeles District.			2007-07-05	D. H. Norris
Moss	UC2053591	110102	Ectropothecium	leptochaeton	Hypnaceae	On moist, shaded log along Trail "E" in cloud forest on moderate slopes of the watershed of the Quebrada Verde in the Cordillera de TilarÃ¡n along Highway 142 about 15 km north of San Ramon in San Ramon Canton, Angeles District.			2007-07-05	D. H. Norris
Moss	UC2053993	5	Ectropothecium	leptochaeton	Hypnaceae	On rock in cloud forest.			2010-03-11	Frida Rosengren
Moss	UC2053487	110893	Ectropothecium		Hypnaceae	On login Nectandra Reserve.			2009-03-26	D. H. Norris
Moss	UC2053488	111248	Ectropothecium		Hypnaceae	On gravel in Trail "A" near parking lot for Nectandra Gardens in area of cloud forest on moderate slopes of the watershed of the Quebrada Verde in the Cordillera de TilarÌÁn about 15 km north of San Ramon in San Ramon Canton, Angeles District.			2010-03-11	D. H. Norris
Moss	UC2053908	38	Ectropothecium		Hypnaceae	On tree in the Nectandra Gardens in cloud forest.			2010-03-11	D. Lucas
Moss	UC2053767	17197	Herzogiella		Hypnaceae	On twig overarching stream at edge of multi-layered tropical cloud forest abutting on Dracaena plantation.			2010-03-11	Allen Risk
Moss	UC2053799	5728	Herzogiella	cylindricarpa	Hypnaceae	On wet rock in stream in Ocotea portion of Nectandra Gardens.			2010-03-15	Dorothy Allard
Moss	UC2053905	53	Herzogiella	cylindricarpa	Hypnaceae	On stump in cloud forest.			2010-03-11	D. Lucas
Moss	UC2053825	1	Mittenothamnium		Hypnaceae	On tree fern near greenhouse in the Nectandra Gardens in cloud forest.			2010-03-11	D. Lucas
Moss	UC2053828	8	Mittenothamnium		Hypnaceae	On tree in the Nectandra Gardens in cloud forest.			2010-03-11	D. Lucas
Moss	UC2053829	9	Mittenothamnium		Hypnaceae	In the Nectandra Gardens in cloud forest.			2010-03-11	D. Lucas
Moss	UC2053826	49	Mittenothamnium		Hypnaceae	On rock in trail in the Nectandra Gardens in cloud forest.			2010-03-11	D. Lucas
Moss	UC2053827	50	Mittenothamnium		Hypnaceae	On rock in trail in the Nectandra Gardens in cloud forest.			2010-03-11	D. Lucas
Moss	UC2053481	110168	Mittenothamnium	reptans	Hypnaceae	On moist, shaded branches of shrub along Trail "E" in cloud forest on moderate slopes of the watershed of the Quebrada Verde			2007-07-05	D. H. Norris
Moss	UC2053596	110011	Mittenothamnium	reptans	Hypnaceae	On moist, diffusely lit rocks along Trail "A" in cloud forest on moderate slopes of the watershed of the Quebrada Verde in the Cordillera de TilarÃ¡n along Highway 142 about 15 km north of San Ramon in San Ramon Canton, Angeles District.			2007-07-05	D. H. Norris
Moss	UC2053579	110120	Mittenothamnium	reptans	Hypnaceae	On moist shaded log along Trail "E" in cloud forest on moderate slopes of the watershed of the Quebrada Verde in the Cordillera de TilarÃ¡n along Highway 142 about 15 km north of San Ramon in San Ramon Canton, Angeles District.			2007-07-05	D. H. Norris
Moss		110163 B	Mittenothamnium	reptans	Hypnaceae	On moist, shaded bark of small tree along Trail "E" in cloud forest on moderate slopes of the watershed of the Quebrada Verde in the Cordillera de TilarÃ¡n along Highway 142 about 15 km north of San Ramon in San Ramon Canton, Angeles District.			2007-07-05	D. H. Norris
Moss	UC2053480	110346	Mittenothamnium	reptans	Hypnaceae	On moist, shaded rock along Trail "E" in cloud forest on moderate slopes of the watershed of the Quebrada Verde in the Cordillera de TilarÃ¡n along Highway 142 about 15 km north of San Ramon in San Ramon Canton, Angeles District.			2007-07-05	D. H. Norris
Moss	UC2053479	110352	Mittenothamnium	reptans	Hypnaceae	On moist, shaded bark of small tree along Trail "E" in cloud forest on moderate slopes of the watershed of the Quebrada Verde in the Cordillera de TilarÃ¡n along Highway 142 about 15 km north of San Ramon in San Ramon Canton, Angeles District.			2007-07-05	D. H. Norris
Moss	UC2053484	110405	Mittenothamnium	reptans	Hypnaceae	On moist, rather shaded boulder along Trail "C" in cloud forest on moderate slopes of the watershed of the Quebrada Verde in the Cordillera de TilarÃ¡n along Highway 142 about 15 km north of San Ramon in San Ramon Canton, Angeles District.			2007-07-05	D. H. Norris
Moss		110416	Mittenothamnium	reptans	Hypnaceae	On moist, shaded rocks lining trail along Trail "C" in cloud forest on moderate slopes of the watershed of the Quebrada Verde in the Cordillera de TilarÃ¡n along Highway 142 about 15 km north of San Ramon in San Ramon Canton, Angeles District.			2007-07-05	D. H. Norris
Moss	UC2053485	110508	Mittenothamnium	reptans	Hypnaceae	On very moist, rather shaded rock wall in cloud forest on moderate slopes of the watershed of the Quebrada Verde in the Cordillera de TilarÃ¡n near headquarters of Nectandra Gardens along Highway 142 about 15 km north of San Ramon in San Ramon Canton, Angeles District.			2007-07-05	D. H. Norris
Moss	UC2053483	110511	Mittenothamnium	reptans	Hypnaceae	On very moist, rather shaded rock wall in cloud forest on moderate slopes of the watershed of the Quebrada Verde in the Cordillera de TilarÃ¡n near headquarters of Nectandra Gardens along Highway 142 about 15 km north of San Ramon in San Ramon Canton, Angeles District.			2007-07-05	D. H. Norris
Moss	UC2053482	110514	Mittenothamnium	reptans	Hypnaceae	On very moist, rather shaded rock wall in cloud forest on moderate slopes of the watershed of the Quebrada Verde in the Cordillera de TilarÃ¡n near headquarters of Nectandra Gardens along Highway 142 about 15 km north of San Ramon in San Ramon Canton, Angeles District.			2007-07-05	D. H. Norris
Moss	UC2053588	110592	Mittenothamnium	reptans	Hypnaceae	On moist, diffusely lit twigs of shrub in cloud forest along Trail "E" on moderate slopes of the watershed of the Quebrada Verde in the Cordillera de TilarÃ¡n at Nectandra Gardens along Highway 142 about 15 km north of San Ramon in San Ramon Canton, Angeles District.			2007-07-05	D. H. Norris
Moss	UC2053580	110832	Mittenothamnium	reptans	Hypnaceae	On fence post along boundary of the Nectandra Reserve at top of Trail "A" in cloud forest.			2009-03-26	D. H. Norris
Moss	UC2053489	110321	Vesicularia	vesicularis	Hypnaceae	On moist, diffusely lit stones along Trail "E" in cloud forest on moderate slopes of the watershed of the Quebrada Verde in the Cordillera de TilarÃ¡n along Highway 142 about 15 km north of San Ramon in San Ramon Canton, Angeles District.			2007-07-05	D. H. Norris
Moss	UC2053364	111231	Hypopterygium		Hypopterygiaceae	On log in area of cloud forest			2010-03-11	D. H. Norris
Moss	UC2053742	17168	Octoblepharum	albidum	Leucobryaceae	On trunk of tree in cloud forest.			2010-03-11	Allen Risk
Moss	UC2054011	24	Octoblepharum	cocuiense	Leucobryaceae	On trunk of tree in area of cloud forest.			2010-03-11	P. Nonkulolu
Moss	UC2053251	110423	Octoblepharum	cylindricum	Leucobryaceae	On moist, shaded log along Trail "C" in cloud forest on moderate slopes of the watershed of the Quebrada Verde in the Cordillera de TilarÃ¡n along Highway 142 about 15 km north of San Ramon in San Ramon Canton, Angeles District.			2007-07-05	D. H. Norris
Moss	UC2053617	110014	Octoblepharum	erectifolium	Leucobryaceae	On moist, diffusely lit dead branches of tree along Trail "A" in cloud forest on moderate slopes of the watershed of the Quebrada Verde in the Cordillera de TilarÃ¡n along Highway 142 about 15 km north of San Ramon in San Ramon Canton, Angeles District.			2007-07-05	D. H. Norris
Moss	UC2053254	110555	Octoblepharum	erectifolium	Leucobryaceae	On moist, shaded bark of tree in cloud forest along Trail "E" on moderate slopes of the watershed of the Quebrada Verde in the Cordillera de TilarÃ¡n at Nectandra Gardens along Highway 142 about 15 km north of San Ramon in San Ramon Canton, Angeles District.			2007-07-05	D. H. Norris
Moss	UC2053729	17146	Octoblepharum	erectifolium	Leucobryaceae	On log in cloud forest.			2010-03-11	D. H. Norris
Moss	UC2053253	111219	Octoblepharum	pulvinatum	Leucobryaceae	On moist, diffusely lit base of tree in area of cloud forest			2010-03-11	D. H. Norris
Moss		110152	Octoblepharum	pulvinatum	Leucobryaceae	On moist, shaded bark of tree along Trail "E" in cloud forest on moderate slopes of the watershed of the Quebrada Verde in the Cordillera de TilarÃ¡n along Highway 142 about 15 km north of San Ramon in San Ramon Canton, Angeles District.			2007-07-05	D. H. Norris
Moss	UC2053252	110552	Octoblepharum	pulvinatum	Leucobryaceae	On moist, shaded log in cloud forest along Trail "E" on moderate slopes of the watershed of the Quebrada Verde in the Cordillera de TilarÃ¡n at Nectandra Gardens along Highway 142 about 15 km north of San Ramon in San Ramon Canton, Angeles District.			2007-07-05	D. H. Norris
Moss	UC2053950	18	Leucomium		Leucomiaceae	In area of cloud forest.			2010-03-11	D. H. Norris
Moss		109961	Leucomium	strumosum	Leucomiaceae	On creosote of roadway in cloud forest along road near entrance gate to Nectandra Garden on moderate slopes of the watershed of the Quebrada Verde in the Cordillera de TilarÃ¡n along Highway 142 about 15 km north of San Ramon in San Ramon Canton, Angeles District.			2007-07-05	D. H. Norris
Moss	UC2053359	110361	Leucomium	strumosum	Leucomiaceae	On moist, diffusely lit boulder along Trail "C" in cloud forest on moderate slopes of the watershed of the Quebrada Verde in the Cordillera de TilarÃ¡n along Highway 142 about 15 km north of San Ramon in San Ramon Canton, Angeles District.			2007-07-05	D. H. Norris
Moss	UC2053390	111062	Floribundaria	flaccida	Meteoriaceae	On sunny bark of shrub in the Nectandra Gardens in area of cloud forest			2009-04-23	D. H. Norris
Moss	UC2053385	110479	Squamidium		Meteoriaceae	On moist, diffusely lit twigs at edge of cloud forest on moderate slopes of the watershed of the Quebrada Verde in the Cordillera de TilarÃ¡n at entrance to Nectandra Gardens along Highway 142 about 15 km north of San Ramon in San Ramon Canton, Angeles District.			2007-07-05	D. H. Norris
Moss	UC2053578	110018	Squamidium	leucotrichum	Meteoriaceae	On moist, diffusely lit branches of tree along Trail "A" in cloud forest on moderate slopes of the watershed of the Quebrada Verde in the Cordillera de TilarÃ¡n along Highway 142 about 15 km north of San Ramon in San Ramon Canton, Angeles District.			2007-07-05	D. H. Norris
Moss		110447	Squamidium	leucotrichum	Meteoriaceae	On very moist, diffusely lit rock wall at edge of cloud forest on moderate slopes of the watershed of the Quebrada Verde in the Cordillera de TilarÃ¡n at entrance to Nectandra Gardens along Highway 142 about 15 km north of San Ramon in San Ramon Canton, Angeles District.			2007-07-05	D. H. Norris
Moss	UC2054012	25	Squamidium	livens	Meteoriaceae	In area of cloud forest.			2010-03-11	D. H. Norris
Moss	UC2053813	62	Toloxis	imponderosa	Meteoriaceae	On bark of tree in creek near headquarters of the Nectandra Gardens.			2010-03-11	D. H. Norris
Moss	UC2053104	110451	Zelometeorium	recurvifolium	Meteoriaceae	On very moist, diffusely lit rock wall at edge of cloud forest on moderate slopes of the watershed of the Quebrada Verde in the Cordillera de TilarÃ¡n at entrance to Nectandra Gardens along Highway 142 about 15 km north of San Ramon in San Ramon Canton, Angeles District.			2007-07-05	D. H. Norris
Moss	UC2053709	110100	Plagiomnium	rhynchophorus	Mniaceae	On moist, diffusely lit top of large rock in stream along Trail "E" in cloud forest on moderate slopes of the watershed of the Quebrada Verde in the Cordillera de TilarÃ¡n along Highway 142 about 15 km north of San Ramon in San Ramon Canton, Angeles District.			2007-07-05	D. H. Norris
Moss	UC2053801	51	Homalia	glabella	Neckeraceae	On rock in creek near headquarters of the Nectandra Gardens.			2010-03-11	D. H. Norris
Moss		110145 H	Isodrepanium	lentulum	Neckeraceae	On moist, shaded leaf of Araceae along Trail "E" in cloud forest on moderate slopes of the watershed of the Quebrada Verde			2007-07-05	D. H. Norris
Moss		110438	Isodrepanium	lentulum	Neckeraceae	On moist, shaded tree along Trail "C" in cloud forest on moderate slopes of the watershed of the Quebrada Verde in the Cordillera de TilarÃ¡n along Highway 142 about 15 km north of San Ramon in San Ramon Canton, Angeles District.			2007-07-05	D. H. Norris
Moss	UC2053616	110004	Isodrepanium	lentulum	Neckeraceae	On moist, diffusely lit branches of tree along Trail "A" in cloud forest on moderate slopes of the watershed of the Quebrada Verde in the Cordillera de TilarÃ¡n along Highway 142 about 15 km north of San Ramon in San Ramon Canton, Angeles District.			2007-07-05	D. H. Norris
Moss		110118	Isodrepanium	lentulum	Neckeraceae	Pendent from moist, shaded branches of shrub along Trail "E" in cloud forest on moderate slopes of the watershed of the Quebrada Verde in the Cordillera de TilarÃ¡n along Highway 142 about 15 km north of San Ramon in San Ramon Canton, Angeles District.			2007-07-05	D. H. Norris
Moss	UC2053105	110876	Neckeropsis	disticha	Neckeraceae	On base of small tree in Nectandra Reserve.			2009-03-26	D. H. Norris
Moss	UC2053812	61	Orthostichella		Neckeraceae	On bark of tree in creek near headquarters of the Nectandra Gardens.			2010-03-11	Freddy Castillo
Moss	UC2053620	110121	Porotrichum		Neckeraceae	On moist, shaded bark of large tree along Trail "E" in cloud forest on moderate slopes of the watershed of the Quebrada Verde in the Cordillera de TilarÃ¡n along Highway 142 about 15 km north of San Ramon in San Ramon Canton, Angeles District.			2007-07-05	D. H. Norris
Moss	UC2053615	110374	Porotrichum		Neckeraceae	On moist, shaded boulder along Trail "C" in cloud forest on moderate slopes of the watershed of the Quebrada Verde in the Cordillera de TilarÃ¡n along Highway 142 about 15 km north of San Ramon in San Ramon Canton, Angeles District.			2007-07-05	D. H. Norris
Moss	UC2053245	110843	Porotrichum		Neckeraceae	On leaf of palm along boundary of the Nectandra Reserve at top of Trail "A" in cloud forest.			2009-03-26	D. H. Norris
Moss	UC2053772	17206	Porotrichum		Neckeraceae	On twigs of fallen tree near stream at edge of multi-layered tropical cloud forest abutting on Dracaena plantation.			2010-03-11	Allen Risk
Moss	UC2053946	17	Porotrichum		Neckeraceae	In the Nectandra Gardens in cloud forest.			2010-03-11	P. Nonkulolu
Moss	UC2053246	111072	Porotrichum	longirostre	Neckeraceae	On trunk of tree in the Nectandra Gardens in area of cloud forest			1905-07-01	D. H. Norris
Moss		110072	Porotrichum	longirostre	Neckeraceae	On very moist, shaded rounded boulder in stream along Trail "E" in cloud forest on moderate slopes of the watershed of the Quebrada Verde in the Cordillera de TilarÃ¡n along Highway 142 about 15 km north of San Ramon in San Ramon Canton, Angeles District.			2007-07-05	D. H. Norris
Moss	UC2053621	110112	Porotrichum	longirostre	Neckeraceae	Pendent from moist, shaded twigs of shrub along Trail "E" in cloud forest on moderate slopes of the watershed of the Quebrada Verde in the Cordillera de TilarÃ¡n along Highway 142 about 15 km north of San Ramon in San Ramon Canton, Angeles District.			2007-07-05	D. H. Norris
Moss	UC2053244	110454	Porotrichum	longirostre	Neckeraceae	On very moist, diffusely lit trunk of tree fern at edge of cloud forest on moderate slopes of the watershed of the Quebrada Verde in the Cordillera de TilarÃ¡n at entrance to Nectandra Gardens along Highway 142 about 15 km north of San Ramon in San Ramon Canton, Angeles District.			2007-07-05	D. H. Norris
Moss	UC2053795	5722	Porotrichum	longirostre	Neckeraceae	On vertical surface of wet rock at water's edge near stream in Ocotea portion of Nectandra Gardens.			2010-03-15	Dorothy Allard
Moss	UC2053255	110150	Porotrichum	mutabile	Neckeraceae	On moist, shaded log along Trail "E" in cloud forest on moderate slopes of the watershed of the Quebrada Verde in the Cordillera de TilarÃ¡n along Highway 142 about 15 km north of San Ramon in San Ramon Canton, Angeles District.			2007-07-05	D. H. Norris
Moss	UC2053248	110299	Porotrichum	mutabile	Neckeraceae	On moist, diffusely lit stem of vine along Trail "E" in cloud forest on moderate slopes of the watershed of the Quebrada Verde in the Cordillera de TilarÃ¡n along Highway 142 about 15 km north of San Ramon in San Ramon Canton, Angeles District.			2007-07-05	D. H. Norris
Moss	UC2053247	110464	Porotrichum	mutabile	Neckeraceae	On moist, shaded leaf????? of Araceae at edge of cloud forest on moderate slopes of the watershed of the Quebrada Verde in the Cordillera de TilarÃ¡n at entrance to Nectandra Gardens along Highway 142 about 15 km north of San Ramon in San Ramon Canton, Angeles District.			2007-07-05	D. H. Norris
Moss	UC2053439	110444	Groutiella	chimborazensis	Orthotrichaceae	On very moist, diffusely lit rock wall at edge of cloud forest on moderate slopes of the watershed of the Quebrada Verde in the Cordillera de TilarÃ¡n at entrance to Nectandra Gardens along Highway 142 about 15 km north of San Ramon in San Ramon Canton, Angeles District.			2007-07-05	D. H. Norris
Moss	UC2053438	110453	Groutiella	chimborazensis	Orthotrichaceae	On very moist, diffusely lit trunk of tree fern at edge of cloud forest on moderate slopes of the watershed of the Quebrada Verde in the Cordillera de TilarÃ¡n at entrance to Nectandra Gardens along Highway 142 about 15 km north of San Ramon in San Ramon Canton, Angeles District.			2007-07-05	D. H. Norris
Moss	UC2053603	110045	Macromitrium		Orthotrichaceae	On moist, sunny twigs of shrub at crest of Trail "A" in cloud forest border adjacent to pastured lands on moderate slopes of the watershed of the Quebrada Verde in the Cordillera de TilarÃ¡n along Highway 142 about 15 km north of San Ramon in San Ramon Canton, Angeles District.			2007-07-05	D. H. Norris
Moss	UC2053428	110466	Macromitrium		Orthotrichaceae	On moist, sunny soil along highway at edge of cloud forest on moderate slopes of the watershed of the Quebrada Verde in the Cordillera de TilarÃ¡n at entrance to Nectandra Gardens along Highway 142 about 15 km north of San Ramon in San Ramon Canton, Angeles District.			2007-07-05	D. H. Norris
Moss	UC2053437	110522	Macromitrium		Orthotrichaceae	On moist, sunny rock wall in cloud forest on moderate slopes of the watershed of the Quebrada Verde in the Cordillera de TilarÃ¡n near headquarters of Nectandra Gardens along Highway 142 about 15 km north of San Ramon in San Ramon Canton, Angeles District.			2007-07-05	D. H. Norris
Moss	UC2053432	111025	Macromitrium		Orthotrichaceae	On tree in the Nectandra Gardens in area of cloud forest.			23 April- 7 May 2009	D. H. Norris
Moss	UC2053433	111034	Macromitrium		Orthotrichaceae	On branches of shrub in the Nectandra Gardens in area of cloud forest.			23 April- 7 May 2009	D. H. Norris
Moss	UC2053604	111224	Macromitrium		Orthotrichaceae	On log in area of cloud forest.			2010-03-11	D. H. Norris
Moss	UC2053895	52	Macromitrium		Orthotrichaceae	In cloud forest.			2010-03-11	D. Lucas
Moss	UC2053424	110932	Macromitrium	cirrosum	Orthotrichaceae	On bark of tree in open area beyond rope bridge in Nectandra Reserve.			2010-03-26	D. H. Norris
Moss	UC2053425	110933	Macromitrium	flavopilosum	Orthotrichaceae	On bark of tree in open area beyond bridge in Nectandra Reserve.			2009-03-26	D. H. Norris
Moss	UC2053435	110371	Macromitrium	fusco-aureum	Orthotrichaceae	On moist, diffusely lit rock wall along Trail "C" in cloud forest on moderate slopes of the watershed of the Quebrada Verde in the Cordillera de TilarÃ¡n along Highway 142 about 15 km north of San Ramon in San Ramon Canton, Angeles District.			2007-07-05	D. H. Norris
Moss	UC1944218	110181	Macromitrium	punctatum	Orthotrichaceae	On moist, sunny limbs of shrub at crest of Trail "A" in cloud forest border adjacent to pastured lands on moderate slopes of the watershed of the Quebrada Verde in the Cordillera de TilarÃ¡n along Highway 142 about 15 km north of San Ramon in San Ramon Canton, Angeles District.			2007-07-05	D. H. Norris
Moss	UC2053430	110490	Macromitrium	punctatum	Orthotrichaceae	On moist, shaded bark of small tree at edge of cloud forest on moderate slopes of the watershed of the Quebrada Verde in the Cordillera de TilarÃ¡n at entrance to Nectandra Gardens along Highway 142 about 15 km north of San Ramon in San Ramon Canton, Angeles District.			2007-07-05	D. H. Norris
Moss	UC2053429	110492	Macromitrium	punctatum	Orthotrichaceae	On moist, shaded bark of tree at edge of cloud forest on moderate slopes of the watershed of the Quebrada Verde in the Cordillera de TilarÃ¡n at entrance to Nectandra Gardens along Highway 142 about 15 km north of San Ramon in San Ramon Canton, Angeles District.			2007-07-05	D. H. Norris
Moss	UC2053434	111094	Macromitrium	punctatum	Orthotrichaceae	On sunny fencepost at edge of Ocotea portion of Nectandra Garens in area of cloud forest			2009-04-23	D. H. Norris
Moss	UC2053803	52	Macromitrium	punctatum	Orthotrichaceae	On bark of tree in creek near headquarters of the Nectandra Gardens.			2010-03-11	Freddy Castillo
Moss		110177	Macromitrium	punctatum	Orthotrichaceae	On moist, sunny limbs of shrub at crest of Trail "A" in cloud forest border adjacent to pastured lands on moderate slopes of the watershed of the Quebrada Verde in the Cordillera de TilarÃ¡n along Highway 142 about 15 km north of San Ramon in San Ramon Canton, Angeles District.			2007-07-05	D. H. Norris
Moss	UC2054047	110235 B	Macromitrium	scoparium	Orthotrichaceae	On moist, sunny fencepost at crest of trail "A" in cloud forest border adjacent to pastured lands			2007-07-05	D. H. Norris
Moss	UC2053431	110149	Macromitrium	scoparium	Orthotrichaceae	On moist, shaded log along Trail "E" in cloud forest on moderate slopes of the watershed of the Quebrada Verde in the Cordillera de TilarÃ¡n along Highway 142 about 15 km north of San Ramon in San Ramon Canton, Angeles District.			2007-07-05	D. H. Norris
Moss	UC2053426	110178	Macromitrium	scoparium	Orthotrichaceae	On moist, sunny fencepost at crest of Trail "A" in cloud forest border adjacent to pastured lands on moderate slopes of the watershed of the Quebrada Verde			2007-07-05	D. H. Norris
Moss	UC2053427	110230	Macromitrium	scoparium	Orthotrichaceae	On moist, sunny fencepost at crest of Trail "A" in cloud forest border adjacent to pastured lands on moderate slopes of the watershed of the Quebrada Verde			2007-07-05	D. H. Norris
Moss	UC2053436	110524	Macromitrium	scoparium	Orthotrichaceae	On moist, diffusely lit branch fallen from canopy in cloud forest on moderate slopes of the watershed of the Quebrada Verde in the Cordillera de TilarÃ¡n near headquarters of Nectandra Gardens along Highway 142 about 15 km north of San Ramon in San Ramon Canton, Angeles District.			2007-07-05	D. H. Norris
Moss	UC2053601	110515	Phyllogonium	fulgens	Phyllogoniaceae	On very moist, rather shaded rock wall in cloud forest on moderate slopes of the watershed of the Quebrada Verde in the Cordillera de TilarÃ¡n near headquarters of Nectandra Gardens along Highway 142 about 15 km north of San Ramon in San Ramon Canton, Angeles District.			2007-07-05	D. H. Norris
Moss	UC2053394	110826	Phyllogonium	fulgens	Phyllogoniaceae	On tree fern near entrance to the Nectandra Reserve in cloud forest			2009-03-26	D. H. Norris
Moss	UC2053602	110498	Phyllogonium	viride	Phyllogoniaceae	Pendent from moist, shaded branches of tree at edge of cloud forest on moderate slopes of the watershed of the Quebrada Verde in the Cordillera de TilarÃ¡n at entrance to Nectandra Gardens along Highway 142 about 15 km north of San Ramon in San Ramon Canton, Angeles District.			2007-07-05	D. H. Norris
Moss	UC2053677	110443	Brymela	parkeriana	Pilotrichaceae kindb.	On very moist, diffusely lit rock wall at edge of cloud forest on moderate slopes of the watershed of the Quebrada Verde in the Cordillera de TilarÃ¡n at entrance to Nectandra Gardens along Highway 142 about 15 km north of San Ramon in San Ramon Canton, Angeles District.			2007-07-05	D. H. Norris
Moss	UC2054042	110392B	Callicostella	pallida	Pilotrichaceae kindb.	On moist, shaded boulder along intermittent stream along Trail "C" in cloud forest			2007-07-05	D. H. Norris
Moss	UC2053365	111213	Callicostella	pallida	Pilotrichaceae kindb.	On moist, diffusely lit base of tree in area of cloud forest			2010-03-11	D. H. Norris
Moss		110163 C	Callicostella	pallida	Pilotrichaceae kindb.	On moist, shaded bark of small tree along Trail "E" in cloud forest on moderate slopes of the watershed of the Quebrada Verde in the Cordillera de TilarÃ¡n along Highway 142 about 15 km north of San Ramon in San Ramon Canton, Angeles District.			2007-07-05	D. H. Norris
Moss		110512	Crossomitrium	epiphyllum	Pilotrichaceae kindb.	On very moist, rather shaded rock wall in cloud forest on moderate slopes of the watershed of the Quebrada Verde in the Cordillera de TilarÃ¡n near headquarters of Nectandra Gardens along Highway 142 about 15 km north of San Ramon in San Ramon Canton, Angeles District.			2007-07-05	D. H. Norris
Moss	UC2053361	110843	Crossomitrium		Pilotrichaceae kindb.	On leaf of palm along boundary of the Nectandra Reserve at top of Trail "A" in cloud forest.			2009-03-26	D. H. Norris
Moss	UC2054066	110904A	Crossomitrium		Pilotrichaceae kindb.	On leaf in Nectandra Reserve			2009-03-26	D. H. Norris
Moss	UC2053631	17136	Crossomitrium		Pilotrichaceae kindb.	On leaves of tree in cloud forest			2010-03-11	Allen Risk
Moss	UC2053832	110301B	Cyclodictyon	varians	Pilotrichaceae kindb.	On moist, rather shaded log along Trail "E" in cloud forest			2007-07-05	D. H. Norris
Moss	UC1944221	110303	Cyclodictyon	varians	Pilotrichaceae kindb.	On moist, rather shaded log along Trail "E" in cloud forest on moderate slopes of the watershed of the Quebrada Verde in the Cordillera de TilarÃ¡n along Highway 142 about 15 km north of San Ramon in San Ramon Canton, Angeles District.			2007-07-05	D. H. Norris
Moss	UC2053382	111237	Cyclodictyon		Pilotrichaceae kindb.	On log in area of cloud forest			2010-03-11	D. H. Norris
Moss	UC2053383	110304	Cyclodictyon	albicans	Pilotrichaceae kindb.	On moist, rather shaded log along Trail "E" in cloud forest on moderate slopes of the watershed of the Quebrada Verde in the Cordillera de TilarÃ¡n along Highway 142 about 15 km north of San Ramon in San Ramon Canton, Angeles District.			2007-07-05	D. H. Norris
Moss	UC2053267	111252	Cyclodictyon	rubrisetum	Pilotrichaceae kindb.	On small branches of shrub near waterline of small stream along Trail "E" of Nectandra Gardens near rope bridge in area of cloud forest			2010-03-17	D. H. Norris
Moss	UC2053853	110398E	Thamniopsis		Pilotrichaceae kindb.	On moist, shaded leaves of shrub along Trail "C" in cloud forest			2007-07-05	D. H. Norris
Moss	UC2053918	27	Thamniopsis		Pilotrichaceae kindb.	In the Nectandra Gardens in cloud forest.			2010-03-11	D. Lucas
Moss	UC2053679	110419	Thamniopsis	crugariani	Pilotrichaceae kindb.	On moist, diffusely lit rocks lining trail along Trail "C" in cloud forest on moderate slopes of the watershed of the Quebrada Verde in the Cordillera de TilarÃ¡n along Highway 142 about 15 km north of San Ramon in San Ramon Canton, Angeles District.			2007-07-05	D. H. Norris
Moss	UC2053612	110094	Thamniopsis	incurva	Pilotrichaceae kindb.	On moist, diffusely lit log along Trail "E" in cloud forest on moderate slopes of the watershed of the Quebrada Verde in the Cordillera de TilarÃ¡n along Highway 142 about 15 km north of San Ramon in San Ramon Canton, Angeles District.			2007-07-05	D. H. Norris
Moss	UC2053879	110148B	Thamniopsis	incurva	Pilotrichaceae kindb.	On moist, shaded log along trail "E" in cloud forest			2007-07-05	D. H. Norris
Moss	UC2053644	110393	Thamniopsis	undata	Pilotrichaceae kindb.	On moist, shaded log along Trail "C" in cloud forest on moderate slopes of the watershed of the Quebrada Verde in the Cordillera de TilarÃ¡n along Highway 142 about 15 km north of San Ramon in San Ramon Canton, Angeles District.			2007-07-05	D. H. Norris
Moss	UC2053645	111257	Thamniopsis	undata	Pilotrichaceae kindb.	On small branches of shrub near waterline of small stream along Trail "E" of Nectandra Gardens near rope bridge in area of cloud forest.			2010-03-11	D. H. Norris
Moss	UC2053945	16	Thamniopsis	undata	Pilotrichaceae kindb.	On stone in cloud forest.			2010-03-11	P. Nonkulolu
Moss	UC2053223	110542A	Trachyxiphium	guadalupense	Pilotrichaceae kindb.	On moist, shaded boulder along trail in cloud forest along Trail "E" on moderate slopes of the watershed of the Quebrada Verde in the Cordillera de TilarÃ¡n at Nectandra Gardens along Highway 142 about 15 km north of San Ramon in San Ramon Canton, Angeles District.			2007-07-05	D. H. Norris
Moss	UC2053834	110148A	Trachyxiphium	guadalupense	Pilotrichaceae kindb.	On moist, shaded log along Trail "E" in cloud forest			2007-07-05	D. H. Norris
Moss	UC2053641	110373	Trachyxiphium	guadalupense	Pilotrichaceae kindb.	On moist, shaded boulder along Trail "C" in cloud forest on moderate slopes of the watershed of the Quebrada Verde in the Cordillera de TilarÃ¡n along Highway 142 about 15 km north of San Ramon in San Ramon Canton, Angeles District.			2007-07-05	D. H. Norris
Moss	UC2053671	110412	Trachyxiphium	guadalupense	Pilotrichaceae kindb.	On moist, diffusely lit boulder along Trail "C" in cloud forest on moderate slopes of the watershed of the Quebrada Verde in the Cordillera de TilarÃ¡n along Highway 142 about 15 km north of San Ramon in San Ramon Canton, Angeles District.			2007-07-05	D. H. Norris
Moss	UC2053622	110420	Trachyxiphium	guadalupense	Pilotrichaceae kindb.	On moist, diffusely lit stones in Trail "C" in cloud forest on moderate slopes of the watershed of the Quebrada Verde in the Cordillera de TilarÃ¡n along Highway 142 about 15 km north of San Ramon in San Ramon Canton, Angeles District.			2007-07-05	D. H. Norris
Moss	UC2053887	110421	Trachyxiphium	guadalupense	Pilotrichaceae kindb.	On moist, diffusely lit stones in Trail "C" in cloud forest on moderate slopes of the watershed of the Quebrada Verde in the Cordillera de TilarÃ¡n along Highway 142 about 15 km north of San Ramon in San Ramon Canton, Angeles District.			2007-07-05	D. H. Norris
Moss	UC2053537	110422	Trachyxiphium	guadalupense	Pilotrichaceae kindb.	On moist, diffusely lit stones in Trail "C" in cloud forest on moderate slopes of the watershed of the Quebrada Verde in the Cordillera de TilarÃ¡n along Highway 142 about 15 km north of San Ramon in San Ramon Canton, Angeles District.			2007-07-05	D. H. Norris
Moss	UC2053642	110509	Trachyxiphium	guadalupense	Pilotrichaceae kindb.	On very moist, rather shaded rock wall in cloud forest on moderate slopes of the watershed of the Quebrada Verde in the Cordillera de TilarÃ¡n near headquarters of Nectandra Gardens along Highway 142 about 15 km north of San Ramon in San Ramon Canton, Angeles District.			2007-07-05	D. H. Norris
Moss	UC2053678	110594	Trachyxiphium	guadalupense	Pilotrichaceae kindb.	On moist, shaded log in cloud forest along Trail "E" on moderate slopes of the watershed of the Quebrada Verde in the Cordillera de TilarÃ¡n at Nectandra Gardens along Highway 142 about 15 km north of San Ramon in San Ramon Canton, Angeles District.			2007-07-05	D. H. Norris
Moss	UC2053633	110831	Trachyxiphium	guadalupense	Pilotrichaceae kindb.	On bark of tree along boundary of the Nectandra Reserve at top of Trail "A" in cloud forest			2009-03-26	D. H. Norris
Moss	UC2054059	111057B	Trachyxiphium	guadalupense	Pilotrichaceae kindb.	On bark of large tree in the Nectandra Gardens in area of cloud forest			2009-03-26	D. H. Norris
Moss	UC2053222	111240	Trachyxiphium	guadalupense	Pilotrichaceae kindb.	On stone along Trail "A" of Nectandra Gardens in area of cloud forest			2010-03-11	D. H. Norris
Moss	UC2053734	17154	Trachyxiphium	guadalupense	Pilotrichaceae kindb.	On tree buttress by trail in cloud forest.			2010-03-11	Allen Risk
Moss	UC2053931	5	Trachyxiphium	guadalupense	Pilotrichaceae kindb.	On stone in area of cloud forest.			2010-03-11	P. Nonkulolu
	UC2053672	110415	Trachyxiphina	guadelupengi	Pilotrichaceae kindb.	On moist, rather shaded leaves along Trail "C" in cloud forest on moderate slopes of the watershed of the Quebrada Verde in the Cordillera de TilarÃ¡n along Highway 142 about 15 km north of San Ramon in San Ramon Canton, Angeles District.			2007-07-05	D. H. Norris
Moss	UC2053789	110424	Trachyxiphium	heteroica	Pilotrichaceae kindb.	On moist, shaded log along Trail "C" in cloud forest on moderate slopes of the watershed of the Quebrada Verde in the Cordillera de TilarÃ¡n along Highway 142 about 15 km north of San Ramon in San Ramon Canton, Angeles District.			2007-07-05	D. H. Norris
Moss	UC2053634	110095	Trachyxiphium	hypnaceum	Pilotrichaceae kindb.	On moist, diffusely lit log along Trail "E" in cloud forest on moderate slopes of the watershed of the Quebrada Verde in the Cordillera de TilarÃ¡n along Highway 142 about 15 km north of San Ramon in San Ramon Canton, Angeles District.			2007-07-05	D. H. Norris
Moss	UC2053815	4	Trachyxiphium	repens	Pilotrichaceae kindb.	On stump in the Nectandra Gardens in cloud forest.			2010-03-11	D. Lucas
Moss	UC2053629	110093	Trachyxiphium		Pilotrichaceae kindb.	On moist, diffusely lit log along Trail "E" in cloud forest on moderate slopes of the watershed of the Quebrada Verde in the Cordillera de TilarÃ¡n along Highway 142 about 15 km north of San Ramon in San Ramon Canton, Angeles District.			2007-07-05	D. H. Norris
Moss	UC2053440	110931	Atrichum		Polytrichaceae Schwagr.	On soil in open area beyond rope bridge in Nectandra Reserve.			2009-03-26	D. H. Norris
Moss		110212	Pogonatum	tortile	Polytrichaceae Schwagr.	On moist, diffusely lit soil on root wad of recently fallen tree at crest of Trail "A" in cloud forest border adjacent to pastured lands on moderate slopes of the watershed of the Quebrada Verde			2007-07-05	D. H. Norris
Moss	UC2053407	110446	Hyophila		Pottiaceae	On very moist, diffusely lit rock wall at edge of cloud forest on moderate slopes of the watershed of the Quebrada Verde in the Cordillera de TilarÃ¡n at entrance to Nectandra Gardens along Highway 142 about 15 km north of San Ramon in San Ramon Canton, Angeles District.			2007-07-05	D. H. Norris
Moss	UC2053936	9	Hyophila	involuta	Pottiaceae	In area of cloud forest.			2010-03-11	P. Nonkulolu
Moss	UC2053599	110360	Hyophila	involuta	Pottiaceae	On moist, diffusely lit boulder along Trail "C" in cloud forest on moderate slopes of the watershed of the Quebrada Verde in the Cordillera de TilarÃ¡n along Highway 142 about 15 km north of San Ramon in San Ramon Canton, Angeles District.			2007-07-05	D. H. Norris
Moss	UC2053410	110465	Hyophila	involuta	Pottiaceae	On moist, sunny soil along highway at edge of cloud forest on moderate slopes of the watershed of the Quebrada Verde in the Cordillera de TilarÃ¡n at entrance to Nectandra Gardens along Highway 142 about 15 km north of San Ramon in San Ramon Canton, Angeles District.			2007-07-05	D. H. Norris
Moss	UC2053408	110506	Hyophila	involuta	Pottiaceae	On very moist, rather shaded rock wall in cloud forest on moderate slopes of the watershed of the Quebrada Verde in the Cordillera de TilarÃ¡n near headquarters of Nectandra Gardens along Highway 142 about 15 km north of San Ramon in San Ramon Canton, Angeles District.			2007-07-05	D. H. Norris
Moss	UC2053409	110529	Hyophila	involuta	Pottiaceae	On moist, diffusely lit cement of steps in cloud forest along Trail "E" on moderate slopes of the watershed of the Quebrada Verde in the Cordillera de TilarÃ¡n at Nectandra Gardens along Highway 142 about 15 km north of San Ramon in San Ramon Canton, Angeles District.			2007-07-05	D. H. Norris
Moss	UC2053411	110467	Trichostomum	crispulum	Pottiaceae	On moist, sunny soil along highway at edge of cloud forest on moderate slopes of the watershed of the Quebrada Verde in the Cordillera de TilarÃ¡n at entrance to Nectandra Gardens along Highway 142 about 15 km north of San Ramon in San Ramon Canton, Angeles District.			2007-07-05	D. H. Norris
Moss	UC2053386	110468	Orthostichopsis	praetermissa	Pterobryaceae	On moist, sunny fencepost at crest of Trail "A" in cloud forest border adjacent to pastured lands on moderate slopes of the watershed of the Quebrada Verde			2007-07-05	D. H. Norris
Moss	UC2053906	12	Pylaisiadelpha	tenuirostris	Pylaisiadelphaceae	On bark of tree in the Nectandra Gardens in cloud forest.			2010-03-11	D. Lucas
Moss	UC2053732	17152	Pyrrhobryum	spiniforme	Rhizogoniaceae	On cobble by trail in cloud forest.			2010-03-11	Allen Risk
Moss	UC2053940	12	Pyrrhobryum	spiniforme	Rhizogoniaceae	In area of cloud forest.			2010-03-11	P. Nonkulolu
Moss	UC2053904	37	Pyrrhobryum	spiniforme	Rhizogoniaceae	On tree near laboratory in the Nectandra Gardens in cloud forest.			2010-03-11	D. Lucas
Moss	UC2053995	6	Pyrrhobryum	spiniforme	Rhizogoniaceae	On soil in cloud forest.			2010-03-11	Frida Rosengren
Moss	UC2053214	109968	Pyrrhobryum	spiniforme	Rhizogoniaceae	On creosote of roadway in cloud forest along road near entrance gate to Nectandra Garden on moderate slopes of the watershed of the Quebrada Verde in the Cordillera de TilarÃ¡n along Highway 142 about 15 km north of San Ramon in San Ramon Canton, Angeles District.			2007-07-05	D. H. Norris
Moss	UC2053532	109975	Pyrrhobryum	spiniforme	Rhizogoniaceae	On bark of Guarea along Trail "A" in cloud forest on moderate slopes of the watershed of the Quebrada Verde in the Cordillera de TilarÃ¡n along Highway 142 about 15 km north of San Ramon in San Ramon Canton, Angeles District.			2007-07-05	D. H. Norris
Moss	UC2053600	110088	Pyrrhobryum	spiniforme	Rhizogoniaceae	On very moist, shaded buttress of large tree fern along Trail "E" in cloud forest on moderate slopes of the watershed of the Quebrada Verde in the Cordillera de TilarÃ¡n along Highway 142 about 15 km north of San Ramon in San Ramon Canton, Angeles District.			2007-07-05	D. H. Norris
Moss	UC2053392	110326	Pyrrhobryum	spiniforme	Rhizogoniaceae	On moist, shaded rocls along Trail "E" in cloud forest on moderate slopes of the watershed of the Quebrada Verde in the Cordillera de TilarÃ¡n along Highway 142 about 15 km north of San Ramon in San Ramon Canton, Angeles District.			2007-07-05	D. H. Norris
Moss	UC2053391	110329	Pyrrhobryum	spiniforme	Rhizogoniaceae	On moist, shaded rocks along Trail "E" in cloud forest on moderate slopes of the watershed of the Quebrada Verde in the Cordillera de TilarÃ¡n along Highway 142 about 15 km north of San Ramon in San Ramon Canton, Angeles District.			2007-07-05	D. H. Norris
Moss	UC2053393	110437	Pyrrhobryum	spiniforme	Rhizogoniaceae	On moist, shaded tree along Trail "C" in cloud forest on moderate slopes of the watershed of the Quebrada Verde in the Cordillera de TilarÃ¡n along Highway 142 about 15 km north of San Ramon in San Ramon Canton, Angeles District.			2007-07-05	D. H. Norris
Moss	UC2053937	10	Pyrrhobryum	spiniforme	Rhizogoniaceae	In area of cloud forest.			2010-03-11	P. Nonkulolu
Moss	UC2053464	110224	Acroporium	estrellae	Sematophyllaceae	On moist, sunny fencepost at crest of Trail "A" in cloud forest border adjacent to pastured lands on moderate slopes of the watershed of the Quebrada Verde in the Cordillera de Tilarán along Highway 142 about 15 km north of San Ramon in San Ramon Canton, Angeles District.			2007-07-05	D. H. Norris
Moss	UC2053467	110261	Acroporium	estrellae	Sematophyllaceae	On moist, rather shaded base of shrub at crest of Trail "A" in cloud forest border adjacent to pastured lands on moderate slopes of the watershed of the Quebrada Verde in the Cordillera de TilarÃ¡n along Highway 142 about 15 km north of San Ramon in San Ramon Canton, Angeles District.			2007-07-05	D. H. Norris
Moss	UC2053473	110343	Acroporium	estrellae	Sematophyllaceae	On moist, rather shaded bark of small tree along Trail "E" in cloud forest on moderate slopes of the watershed of the Quebrada Verde in the Cordillera de TilarÃ¡n along Highway 142 about 15 km north of San Ramon in San Ramon Canton, Angeles District.			2007-07-05	D. H. Norris
Moss	UC2053465	111076	Acroporium	estrellae	Sematophyllaceae	On bark of tree in the Nectandra Gardens in area of cloud forest			2009-04-23	D. H. Norris
Moss		110145 I	Acroporium	estrellae	Sematophyllaceae	On moist, shaded leaf of Araceae along Trail "E" in cloud forest on moderate slopes of the watershed of the Quebrada Verde			2007-07-05	D. H. Norris
Moss	UC2053723	17134	Acroporium		Sematophyllaceae	NO Habitat given			2010-03-11	Allen Risk
Moss		110038	Acroporium	pungens	Sematophyllaceae	On moist, rather sunny small tree at crest of Trail "A" in cloud forest border adjacent to pastured lands on moderate slopes of the watershed of the Quebrada Verde in the Cordillera de TilarÃ¡n along Highway 142 about 15 km north of San Ramon in San Ramon Canton, Angeles District.			2007-07-05	D. H. Norris
Moss	UC2053472	111007	Acroporium	pungens	Sematophyllaceae	On bark of tree in the Nectandra Gardens in area of cloud forest.			23 April- 7 May 2009	D. H. Norris
Moss	UC2053982	122	Acroporium	pungens	Sematophyllaceae	On stick that is leaning against a tree in abandoned Dracaena plantation at edge of cloud forest.			2010-03-11	Mike Tessler
Moss	UC2053470	110169	Acroporium	pungens	Sematophyllaceae	On moist, shaded branches of shrub along Trail "E" in cloud forest on moderate slopes of the watershed of the Quebrada Verde			2007-07-05	D. H. Norris
Moss	UC2053476	110211	Acroporium	pungens	Sematophyllaceae	On moist, diffusely lit base of tree at crest of Trail "A" in cloud forest border adjacent to pastured lands on moderate slopes of the watershed of the Quebrada Verde			2007-07-05	D. H. Norris
Moss	UC2053468	110345	Acroporium	pungens	Sematophyllaceae	On moist, shaded rock along Trail "E" in cloud forest on moderate slopes of the watershed of the Quebrada Verde in the Cordillera de TilarÃ¡n along Highway 142 about 15 km north of San Ramon in San Ramon Canton, Angeles District.			2007-07-05	D. H. Norris
Moss	UC2053469	110348	Acroporium	pungens	Sematophyllaceae	On moist, diffusely lit twigs of shrub along Trail "E" in cloud forest on moderate slopes of the watershed of the Quebrada Verde in the Cordillera de TilarÃ¡n along Highway 142 about 15 km north of San Ramon in San Ramon Canton, Angeles District.			2007-07-05	D. H. Norris
Moss	UC2053466	110364	Acroporium	pungens	Sematophyllaceae	On moist, diffusely lit boulder along Trail "C" in cloud forest on moderate slopes of the watershed of the Quebrada Verde in the Cordillera de TilarÃ¡n along Highway 142 about 15 km north of San Ramon in San Ramon Canton, Angeles District.			2007-07-05	D. H. Norris
Moss	UC2053477	110432	Acroporium	pungens	Sematophyllaceae	On moist, rather shaded log along Trail "C" in cloud forest on moderate slopes of the watershed of the Quebrada Verde in the Cordillera de TilarÃ¡n along Highway 142 about 15 km north of San Ramon in San Ramon Canton, Angeles District.			2007-07-05	D. H. Norris
Moss	UC2053463	110481	Acroporium	pungens	Sematophyllaceae	On moist, diffusely lit twigs at edge of cloud forest on moderate slopes of the watershed of the Quebrada Verde in the Cordillera de TilarÃ¡n at entrance to Nectandra Gardens along Highway 142 about 15 km north of San Ramon in San Ramon Canton, Angeles District.			2007-07-05	D. H. Norris
Moss	UC2053471	111003	Acroporium	pungens	Sematophyllaceae	On bark of tree in the Nectandra Gardens in area of cloud forest.			23 April- 7 May 2009	D. H. Norris
Moss	UC2053462	111032	Acroporium	pungens	Sematophyllaceae	On leaf of shrub in the Nectandra Gardens in area of cloud forest.			23 April- 7 May 2009	D. H. Norris
Moss	UC2053474	111265	Acroporium	pungens	Sematophyllaceae	On small branches of shrub near waterline of small stream along Trail "E" of Nectandra gardens near rope bridge in area of cloud forest			2010-03-11	D. H. Norris
Moss	UC2053585	110033	Sematophyllum		Sematophyllaceae	On moist, rather sunny limb of tree at crest of Trail "A" in cloud forest border adjacent to pastured lands on moderate slopes of the watershed of the Quebrada Verde in the Cordillera de TilarÃ¡n along Highway 142 about 15 km north of San Ramon in San Ramon Canton, Angeles District.			2007-07-05	D. H. Norris
Moss		110569	Sematophyllum		Sematophyllaceae	On moist, shaded bark of tree in cloud forest along Trail "E" on moderate slopes of the watershed of the Quebrada Verde in the Cordillera de TilarÃ¡n at Nectandra Gardens along Highway 142 about 15 km north of San Ramon in San Ramon Canton, Angeles District.			2007-07-05	D. H. Norris
Moss	UC2053830	33	Sematophyllum		Sematophyllaceae	On horizontal face of boulder in the Nectandra Gardens in cloud forest.			2010-03-11	D. H. Norris
Moss	UC2053445	110356	Sematophyllum	adnatum	Sematophyllaceae	On moist, diffusely lit boulder along Trail "C" in cloud forest on moderate slopes of the watershed of the Quebrada Verde in the Cordillera de TilarÃ¡n along Highway 142 about 15 km north of San Ramon in San Ramon Canton, Angeles District.			2007-07-05	D. H. Norris
Moss	UC2053457	110499	Sematophyllum	adnatum	Sematophyllaceae	On moist, sunny asphalt of highway at edge of cloud forest on moderate slopes of the watershed of the Quebrada Verde in the Cordillera de TilarÃ¡n at entrance to Nectandra Gardens along Highway 142 about 15 km north of San Ramon in San Ramon Canton, Angeles District.			2007-07-05	D. H. Norris
Moss	UC2053764	17193	Sematophyllum	adnatum	Sematophyllaceae	On boulder in stream at edge of multi-layered tropical cloud forest abutting on Dracaena plantation.			2010-03-11	Allen Risk
Moss	UC2053458	110233	Sematophyllum	cuspidatum	Sematophyllaceae	On moist, sunny fencepost at crest of Trail "A" in cloud forest border adjacent to pastured lands on moderate slopes of the watershed of the Quebrada Verde			2007-07-05	D. H. Norris
Moss	UC2053452	110291	Sematophyllum	cuspidatum	Sematophyllaceae	On submerged, diffusely lit rock in small creek at crest of Trail "A" in cloud forest border adjacent to pastured lands on moderate slopes of the watershed of the Quebrada Verde in the Cordillera de TilarÃ¡n along Highway 142 about 15 km north of San Ramon in San Ramon Canton, Angeles District.			2007-07-05	D. H. Norris
Moss	UC2053441	110480	Sematophyllum	cuspidatum	Sematophyllaceae	On moist, diffusely lit twigs at edge of cloud forest on moderate slopes of the watershed of the Quebrada Verde in the Cordillera de TilarÃ¡n at entrance to Nectandra Gardens along Highway 142 about 15 km north of San Ramon in San Ramon Canton, Angeles District.			2007-07-05	D. H. Norris
Moss	UC2053461	110502	Sematophyllum	cuspidatum	Sematophyllaceae	On very moist, rather shaded rock wall in cloud forest on moderate slopes of the watershed of the Quebrada Verde in the Cordillera de TilarÃ¡n near headquarters of Nectandra Gardens along Highway 142 about 15 km north of San Ramon in San Ramon Canton, Angeles District.			2007-07-05	D. H. Norris
Moss	UC2053447	111024	Sematophyllum	cuspidatum	Sematophyllaceae	On tree in the Nectandra Gardens in area of cloud forest.			23 April- 7 May 2009	D. H. Norris
Moss	UC2053444	110359	Sematophyllum	cuspidifera	Sematophyllaceae	On moist, diffusely lit boulder along Trail "C" in cloud forest on moderate slopes of the watershed of the Quebrada Verde in the Cordillera de TilarÃ¡n along Highway 142 about 15 km north of San Ramon in San Ramon Canton, Angeles District.			2007-07-05	D. H. Norris
Moss	UC2053454	110440	Sematophyllum	cuspidifera	Sematophyllaceae	On very moist, diffusely lit rock wall at edge of cloud forest on moderate slopes of the watershed of the Quebrada Verde in the Cordillera de TilarÃ¡n at entrance to Nectandra Gardens along Highway 142 about 15 km north of San Ramon in San Ramon Canton, Angeles District.			2007-07-05	D. H. Norris
Moss	UC2053451	110330	Sematophyllum	cuspidiferum	Sematophyllaceae	On moist, shaded stones along Trail "E" in cloud forest on moderate slopes of the watershed of the Quebrada Verde in the Cordillera de TilarÃ¡n along Highway 142 about 15 km north of San Ramon in San Ramon Canton, Angeles District.			2007-07-05	D. H. Norris
Moss	UC2053757	17186	Sematophyllum	galipense	Sematophyllaceae	On boulder in stream at edge of multi-layered tropical cloud forest abutting on Dracaena plantation.			2010-03-11	Allen Risk
Moss	UC2053587	109964	Sematophyllum	galipense	Sematophyllaceae	On boulder at edge of road in cloud forest along road near entrance gate to Nectandra Garden on moderate slopes of the watershed of the Quebrada Verde in the Cordillera de TilarÃ¡n along Highway 142 about 15 km north of San Ramon in San Ramon Canton, Angeles District.			2007-07-05	D. H. Norris
Moss	UC2053453	110289	Sematophyllum	galipense	Sematophyllaceae	On moist, diffusely lit rock in small creek at crest of Trail "A" in cloud forest border adjacent to pastured lands on moderate slopes of the watershed of the Quebrada Verde in the Cordillera de TilarÃ¡n along Highway 142 about 15 km north of San Ramon in San Ramon Canton, Angeles District.			2007-07-05	D. H. Norris
Moss	UC2053449	110413	Sematophyllum	galipense	Sematophyllaceae	On moist, diffusely lit boulder along Trail "C" in cloud forest on moderate slopes of the watershed of the Quebrada Verde in the Cordillera de TilarÃ¡n along Highway 142 about 15 km north of San Ramon in San Ramon Canton, Angeles District.			2007-07-05	D. H. Norris
Moss	UC2053442	110445	Sematophyllum	galipense	Sematophyllaceae	On very moist, diffusely lit rock wall at edge of cloud forest on moderate slopes of the watershed of the Quebrada Verde in the Cordillera de TilarÃ¡n at entrance to Nectandra Gardens along Highway 142 about 15 km north of San Ramon in San Ramon Canton, Angeles District.			2007-07-05	D. H. Norris
Moss	UC2053450	110450	Sematophyllum	galipense	Sematophyllaceae	On very moist, diffusely lit rock wall at edge of cloud forest on moderate slopes of the watershed of the Quebrada Verde in the Cordillera de TilarÃ¡n at entrance to Nectandra Gardens along Highway 142 about 15 km north of San Ramon in San Ramon Canton, Angeles District.			2007-07-05	D. H. Norris
Moss	UC2053460	110501	Sematophyllum	galipense	Sematophyllaceae	On moist, sunny trunk of tree fern at edge of cloud forest on moderate slopes of the watershed of the Quebrada Verde in the Cordillera de TilarÃ¡n at entrance to Nectandra Gardens along Highway 142 about 15 km north of San Ramon in San Ramon Canton, Angeles District.			2007-07-05	D. H. Norris
Moss	UC2053455	110287	Sematophyllum	sect.	Sematophyllaceae	On moist, diffusely lit rock in small creek at crest of Trail "A" in cloud forest border adjacent to pastured lands on moderate slopes of the watershed of the Quebrada Verde in the Cordillera de TilarÃ¡n along Highway 142 about 15 km north of San Ramon in San Ramon Canton, Angeles District.			2007-07-05	D. H. Norris
Moss	UC2053456	110284	Sematophyllum	subpinnatum	Sematophyllaceae	On moist, diffusely lit rock in small creek at crest of Trail "A" in cloud forest border adjacent to pastured lands on moderate slopes of the watershed of the Quebrada Verde in the Cordillera de TilarÃ¡n along Highway 142 about 15 km north of San Ramon in San Ramon Canton, Angeles District.			2007-07-05	D. H. Norris
Moss	UC2053610	109959	Sematophyllum	subsimplex	Sematophyllaceae	On creosote of roadway in cloud forest along road near entrance gate to Nectandra Garden on moderate slopes of the watershed of the Quebrada Verde in the Cordillera de TilarÃ¡n along Highway 142 about 15 km north of San Ramon in San Ramon Canton, Angeles District.			2007-07-05	D. H. Norris
Moss	UC2053446	110266	Sematophyllum	subsimplex	Sematophyllaceae	On moist, diffusely lit small tree at crest of Trail "A" in cloud forest border adjacent to pastured lands on moderate slopes of the watershed of the Quebrada Verde in the Cordillera de TilarÃ¡n along Highway 142 about 15 km north of San Ramon in San Ramon Canton, Angeles District.			2007-07-05	D. H. Norris
Moss	UC2053459	110239	Sematophyllum		Sematophyllaceae	On moist, diffusely lit base of large and isolated tree at crest of Trail "A" in cloud forest border adjacent to pastured lands on moderate slopes of the watershed of the Quebrada Verde in the Cordillera de TilarÃ¡n along Highway 142 about 15 km north of San Ramon in San Ramon Canton, Angeles District.			2007-07-05	D. H. Norris
Moss	UC2053782	110290	Sematophyllum		Sematophyllaceae	On moist, diffusely lit rock in small creek at crest of Trail "A" in cloud forest border adjacent to pastured lands on moderate slopes of the watershed of the Quebrada Verde in the Cordillera de TilarÃ¡n along Highway 142 about 15 km north of San Ramon in San Ramon Canton, Angeles District.			2007-07-05	D. H. Norris
Moss	UC2053448	110587	Sematophyllum		Sematophyllaceae	On moist, shaded boulder in cloud forest along Trail "E" on moderate slopes of the watershed of the Quebrada Verde in the Cordillera de TilarÃ¡n at Nectandra Gardens along Highway 142 about 15 km north of San Ramon in San Ramon Canton, Angeles District.			2007-07-05	D.H.Norris, 2008.
Moss	UC2053935	8	Sematophyllum		Sematophyllaceae	On stone in area of cloud forest.			2010-03-11	P. Nonkulolu
Moss	UC2053590	111238	Trichosteleum		Sematophyllaceae	On stone along Trail "A" of Nectandra Gardens in area of cloud forest.			2010-03-11	D. H. Norris
Moss	UC2053478	111078	Trichosteleum	sentosum	Sematophyllaceae	On bark of tree in the Nectandra Gardens in ara of cloud forest			2009-04-23	D. H. Norris
Moss		110414H	Wijkia		Sematophyllaceae	On moist, rather shaded leaves along Trail "C" in cloud forest on moderate slopes of the watershed of the Quebrada Verde in the Cordillera de TilarÃ¡n along Highway 142 about 15 km north of San Ramon in San Ramon Canton, Angeles District.			2007-07-05	D. H. Norris
Moss	UC2053831	23	Cyrto-hypnum	schistocalyx	Thuidiaceae	On rock in the Nectandra Gardens in cloud forest.			2010-03-11	D. Lucas
Moss	UC2053402	110282	Cyrto-hypnum	schistocalyx	Thuidiaceae	On moist, diffusely lit soil in trail at crest of Trail "A" in cloud forest border adjacent to pastured lands on moderate slopes of the watershed of the Quebrada Verde in the Cordillera de TilarÃ¡n along Highway 142 about 15 km north of San Ramon in San Ramon Canton, Angeles District.			2007-07-05	D. H. Norris
Moss	UC2053598	109960	Thuidium	schistocalyx	Thuidiaceae	On creosote of roadway in cloud forest along road near entrance gate to Nectandra Garden on moderate slopes of the watershed of the Quebrada Verde			2007-07-05	D. H. Norris
Moss	UC2053595	110010	Thuidium	schistocalyx	Thuidiaceae	On moist, diffusely lit rocks along Trail "A" in cloud forest on moderate slopes of the watershed of the Quebrada Verde in the Cordillera de TilarÃ¡n along Highway 142 about 15 km north of San Ramon in San Ramon Canton, Angeles District.			2007-07-05	D. H. Norris
Moss	UC2053403	110496	Thuidium	schistocalyx	Thuidiaceae	On moist, shaded bark of tree at edge of cloud forest on moderate slopes of the watershed of the Quebrada Verde in the Cordillera de TilarÃ¡n at entrance to Nectandra Gardens along Highway 142 about 15 km north of San Ramon in San Ramon Canton, Angeles District.			2007-07-05	D. H. Norris
Moss	UC2053405	110510	Thuidium	schistocalyx	Thuidiaceae	On very moist, rather shaded rock wall in cloud forest on moderate slopes of the watershed of the Quebrada Verde in the Cordillera de TilarÃ¡n near headquarters of Nectandra Gardens along Highway 142 about 15 km north of San Ramon in San Ramon Canton, Angeles District.			2007-07-05	D. H. Norris
Moss	UC2053401	110316	Thuidium	schistocalyx	Thuidiaceae	On moist, shaded vine along Trail "E" in cloud forest on moderate slopes of the watershed of the Quebrada Verde in the Cordillera de TilarÃ¡n along Highway 142 about 15 km north of San Ramon in San Ramon Canton, Angeles District.			2007-07-05	D. H. Norris
Moss	UC2053399	111246	Thuidium	schistocalyx	Thuidiaceae	On stone along Trail "A" of Nectandra Gardens in area of cloud forest			2010-03-11	D. H. Norris
Moss	UC2053597	110009	Thuidium	tamariscinum	Thuidiaceae	On moist, diffusely lit rocks along Trail "A" in cloud forest on moderate slopes of the watershed of the Quebrada Verde in the Cordillera de TilarÃ¡n along Highway 142 about 15 km north of San Ramon in San Ramon Canton, Angeles District.			2007-07-05	D. H. Norris
Moss	UC2053400	110379	Thuidium	urceolatum	Thuidiaceae	On moist, shaded leaning trunk of tree along Trail "C" in cloud forest on moderate slopes of the watershed of the Quebrada Verde in the Cordillera de TilarÃ¡n along Highway 142 about 15 km north of San Ramon in San Ramon Canton, Angeles District.			2007-07-05	Nancy Hillyard
Moss	UC2053406	110518	Thuidium	urceolatum	Thuidiaceae	On moist, shaded boulder in cloud forest on moderate slopes of the watershed of the Quebrada Verde in the Cordillera de TilarÃ¡n near headquarters of Nectandra Gardens along Highway 142 about 15 km north of San Ramon in San Ramon Canton, Angeles District.			2007-07-05	D. H. Norris
Moss	UC2053387	111044	Thuidium	urceolatum	Thuidiaceae	On base of small shrub in the Nectandra Gardens in area of cloud forest			2009-04-23	D. H. Norris
